# Supplementary material for: Facile synthesis of 2-sulfonylbenzothiazoles via cascade SO2−–NCS addition and S–C(sp2) coupling
Source: Royal Society of Chemistry journal article supplement (doi:10.1039/d4cc05010j), 2025-01-01
Supplement: d4cc05010j1.pdf [file d4cc05010j1.pdf]

# Supporting Information

## Facile Synthesis of 2-Sulfonylbenzothiazoles *via* Cascade SO<sub>2</sub>-NCS Addition and S-C(sp<sup>2</sup>) Coupling

Wenjie Liu<sup>a,b</sup>, Xuehui Zhang<sup>b</sup>, Qian Wu<sup>b</sup>, Zhi-bing Dong<sup>a,\*</sup>, Xiaojing  
Bi<sup>b,\*</sup>, and Enxue Shi<sup>b,\*</sup>

<sup>a</sup>School of Chemistry and Environmental Engineering, Wuhan Institute of  
Technology, Wuhan 430205, China.

E-mail: [dz04982@163.com](mailto:dz04982@163.com)

<sup>b</sup>State Key Laboratory of NBC Protection for Civilian, Beijing 102205, P. R. China.

E-mail: [exshi@sina.com](mailto:exshi@sina.com)

# Contents

|                                                                 |    |
|-----------------------------------------------------------------|----|
| <b>1. Experimental Section</b> .....                            | 1  |
| 1.1 General information .....                                   | 1  |
| 1.2 General procedure for synthesis of compounds <b>3</b> ..... | 1  |
| 1.3 LC-MS monitoring experiments .....                          | 2  |
| <b>2. Characterization data of products 3</b> .....             | 3  |
| <b>3. Copies of NMR spectra of products 3</b> .....             | 12 |
| <b>4. Reference</b> .....                                       | 47 |

# 1. Experimental Section

## 1.1 General information

Reagents were purchased at the highest commercial quality and used without further purification, unless otherwise stated. All reactions were performed in oven-dried glassware with magnetic stirring. Reactions were monitored by LC/MS or thin layer chromatography (TLC). NMR spectra were recorded on Bruker 300 instruments and calibrated using residual undeuterated solvents. The following abbreviations were used to explain multiplicities: s = singlet, d = doublet, t = triplet, q = quartet, m = multiplet, br = broad. Flash column chromatography was performed using Qingdao Haiyang silica (silica gel for thin-layer chromatography, HG/T2354-2010). High-resolution mass spectra (HRMS) were obtained on an Agilent 6545 Q-TOF HPLC and mass spectrometry. The melting point (MP) was measured by Mettler Toledo MP90 melting point system.

## 1.2 General procedure for synthesis of compounds 3

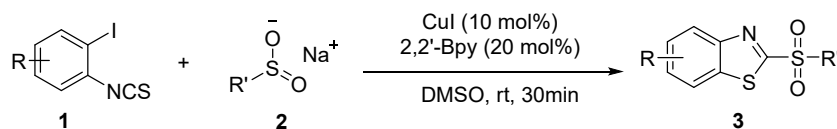

In a reaction flask, **1** (0.20 mmol, 1 equiv.) and **2** (0.40 mmol, 2 equiv.), CuI (10 mol%), 2,2'-Bpy (20 mol%) and DMSO (2 mL) were added. The mixture was stirred for about 30 min at room temperature. The reaction was monitored by thin layer chromatography (TLC) until the substrates disappeared completely. The reaction mixture was added diluted hydrochloric acid (10%, 5 mL) and ethyl acetate (10 mL). The separated organic layer was washed saturated aqueous brine (10 mL × 5), and dried over anhydrous Na<sub>2</sub>SO<sub>4</sub>. After the solvent was evaporated by a rotary evaporator, the concentrated crude products are generally of high-purity as evidenced by the NMR spectroscopy. (The few low-pure products were further isolated and purified by column chromatography (ethyl acetate and petroleum ether, 1:7) to obtain the pure **3**.)

### 1.3 LC-MS monitoring experiments

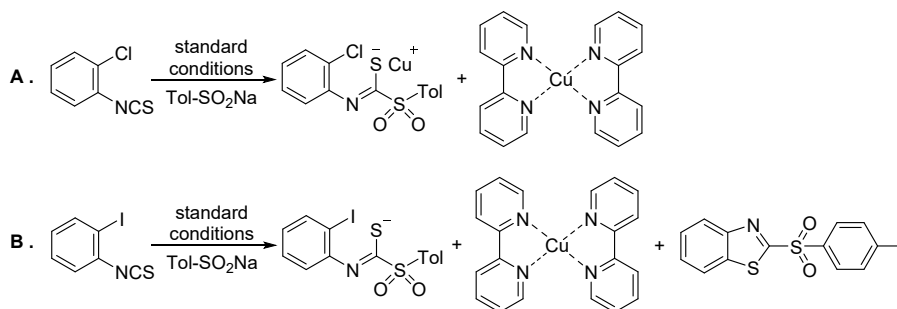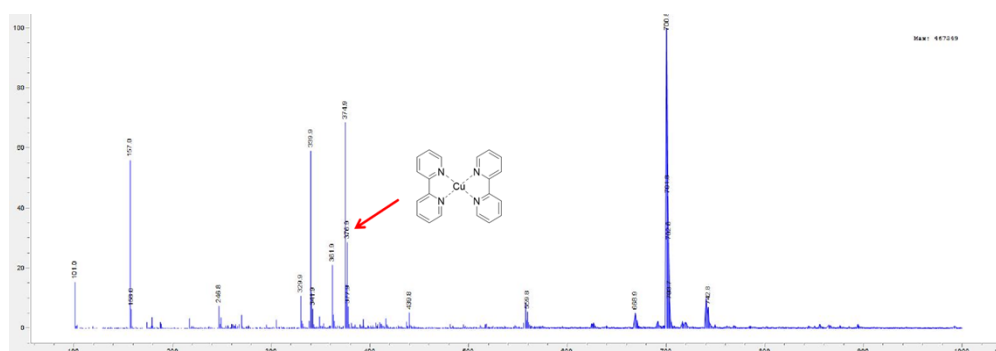

**A-1: Reaction mixture of 2-Cl-PhNCS (5 min)**

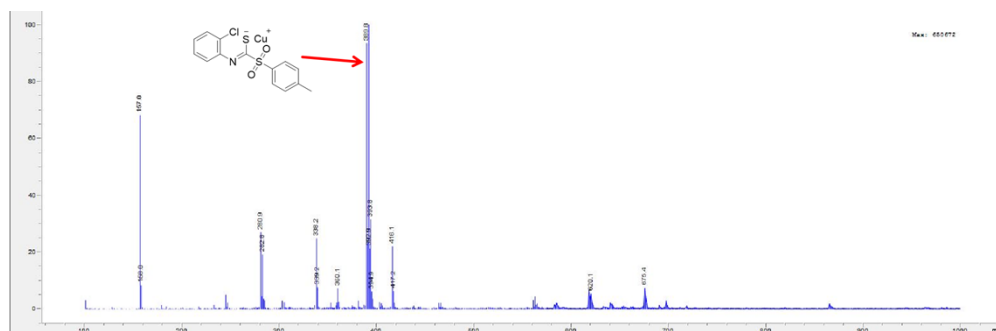

**A-2: Reaction mixture of 2-Cl-PhNCS (10 min)**

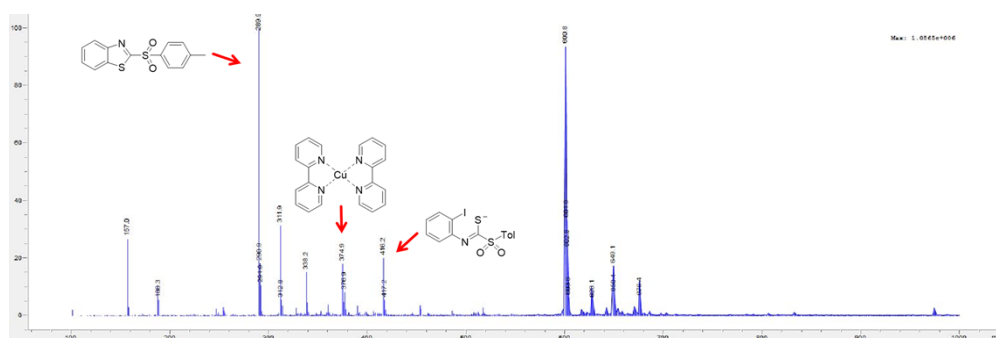

**B: Reaction mixture of 2-I-PhNCS (5 min)**

## 2. Characterization data of products 3

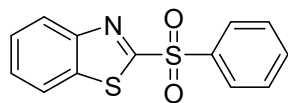

### 2-(phenylsulfonyl)benzo[d]thiazole (3aa)<sup>1</sup>

White solid; mp: 166.4 – 167.2 °C.  $R_f$  = 0.5 (petroleum ether/ethyl acetate 7:1); 51.7 mg, yield 94%. <sup>1</sup>H NMR (300 MHz, Chloroform-*d*) δ 8.22 – 8.10 (m, 3H), 7.96 (dd,  $J$  = 6.9, 2.0 Hz, 1H), 7.70 – 7.50 (m, 5H). <sup>13</sup>C NMR (75 MHz, Chloroform-*d*) δ 167.26, 152.92, 138.47, 137.07, 134.62, 129.58, 128.98, 127.94, 127.56, 125.58, 122.25. HRMS (ESI)  $m/z$ : [M + H]<sup>+</sup> Calcd for C<sub>13</sub>H<sub>10</sub>NO<sub>2</sub>S<sub>2</sub> 276.0148; Found: 276.0151.

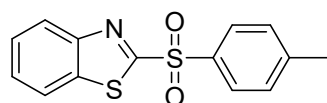

### 2-tosylbenzo[d]thiazole (3ab)<sup>1</sup>

White solid; mp: 146.2 – 147.8 °C.  $R_f$  = 0.5 (petroleum ether/ethyl acetate 7:1); 57.2 mg, yield 99%. <sup>1</sup>H NMR (300 MHz, Chloroform-*d*) δ 8.13 (dd,  $J$  = 6.8, 1.7 Hz, 1H), 8.04 (d,  $J$  = 8.3 Hz, 2H), 7.94 (dd,  $J$  = 7.2, 2.3 Hz, 1H), 7.61 – 7.47 (m, 2H), 7.36 (d,  $J$  = 8.1 Hz, 2H), 2.41 (s, 3H). <sup>13</sup>C NMR (75 MHz, Chloroform-*d*) δ 167.63, 152.86, 146.01, 136.99, 135.40, 130.25, 129.00, 127.86, 127.51, 125.46, 122.25, 21.79. HRMS (ESI)  $m/z$ : [M + H]<sup>+</sup> Calcd for C<sub>14</sub>H<sub>12</sub>NO<sub>2</sub>S<sub>2</sub> 290.0304; Found: 290.0301.

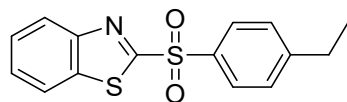

### 2-((4-ethylphenyl)sulfonyl)benzo[d]thiazole (3ac)

White solid; mp: 104.9 – 105.7 °C.  $R_f$  = 0.5 (petroleum ether/ethyl acetate 7:1); 58.2 mg, yield 96%. <sup>1</sup>H NMR (300 MHz, Chloroform-*d*) δ 8.15 (dd,  $J$  = 7.1, 1.8 Hz, 1H), 8.07 (d,  $J$  = 8.4 Hz, 2H), 7.98 – 7.91 (m, 1H), 7.55 (m, 2H), 7.40 (d,  $J$  = 8.5 Hz, 2H), 2.72 (q,  $J$  = 7.6 Hz, 2H), 1.24 (t,  $J$  = 7.6 Hz, 3H). <sup>13</sup>C NMR (75 MHz, Chloroform-*d*) δ 167.68, 152.91, 151.99, 137.04, 135.59, 129.13, 129.11, 127.82, 127.48, 125.52, 122.23, 29.01, 15.00. HRMS (ESI)  $m/z$ : [M + H]<sup>+</sup> Calcd for C<sub>15</sub>H<sub>14</sub>NO<sub>2</sub>S<sub>2</sub> 304.0460; Found: 304.0458.

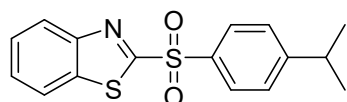

### 2-((4-isopropylphenyl)sulfonyl)benzo[d]thiazole (3ad)<sup>2</sup>

White solid; mp: 133.4 – 134.8 °C.  $R_f$  = 0.5 (petroleum ether/ethyl acetate 7:1); 57.1 mg, yield 90%. <sup>1</sup>H NMR (300 MHz, Chloroform-*d*) δ 8.16 (dd,  $J$  = 7.6, 1.2 Hz, 1H), 8.07 (d,  $J$  = 8.4 Hz, 2H), 7.95 (dd,  $J$  = 7.9, 1.4 Hz, 1H), 7.62 – 7.48 (m, 2H), 7.42 (d,  $J$  = 8.5 Hz, 2H), 3.02 – 2.92 (m, 1H), 1.25 (d,  $J$  = 7.0 Hz, 6H). <sup>13</sup>C NMR (75 MHz, Chloroform-*d*) δ 167.70, 156.49, 152.95, 137.07, 135.72, 129.16, 127.79, 127.74,

127.46, 125.54, 122.21, 34.37, 23.53. HRMS (ESI)  $m/z$ :  $[M + H]^+$  Calcd for  $C_{16}H_{16}NO_2S_2$  318.0617; Found: 318.0619.

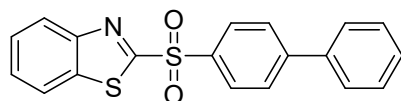

### 2-((1,1'-biphenyl)-4-ylsulfonyl)benzo[d]thiazole (3ae)<sup>2</sup>

White solid; mp: 187.4 – 189.0 °C.  $R_f$  = 0.5 (petroleum ether/ethyl acetate 7:1); 67.4 mg, yield 96%. <sup>1</sup>H NMR (300 MHz, Chloroform-*d*)  $\delta$  8.25 – 8.16 (m, 3H), 7.99 – 7.94 (m, 1H), 7.77 (d,  $J$  = 8.5 Hz, 2H), 7.60 – 7.42 (m, 7H). <sup>13</sup>C NMR (75 MHz, Chloroform-*d*)  $\delta$  167.45, 152.97, 147.62, 138.93, 137.09, 136.87, 129.53, 129.13, 128.88, 128.18, 127.91, 127.55, 127.44, 125.58, 122.25. HRMS (ESI)  $m/z$ :  $[M + H]^+$  Calcd for  $C_{19}H_{14}NO_2S_2$  352.0460; Found: 352.0457.

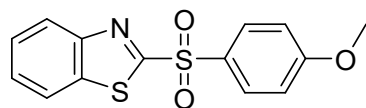

### 2-((4-methoxyphenyl)sulfonyl)benzo[d]thiazole (3af)<sup>1</sup>

White solid; mp: 117.3 – 118.6 °C.  $R_f$  = 0.5 (petroleum ether/ethyl acetate 7:1); 50.6 mg, yield 83%. <sup>1</sup>H NMR (300 MHz, Chloroform-*d*)  $\delta$  8.17 – 8.04 (m, 3H), 7.97 – 7.91 (m, 1H), 7.52 (qd,  $J$  = 7.3, 1.5 Hz, 2H), 7.07 – 6.99 (m, 2H), 3.86 (s, 3H). <sup>13</sup>C NMR (75 MHz, Chloroform-*d*)  $\delta$  168.02, 164.60, 152.86, 138.38, 136.92, 131.33, 129.58, 127.76, 125.42, 122.23, 114.88, 55.83. HRMS (ESI)  $m/z$ :  $[M + H]^+$  Calcd for  $C_{14}H_{12}NO_3S_2$  306.0253; Found: 306.0255.

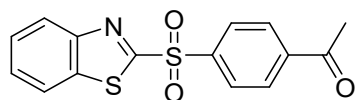

### 1-(4-(benzo[d]thiazol-2-ylsulfonyl)phenyl)ethan-1-one (3ag)<sup>3</sup>

White solid; mp: 163.7 – 165.1 °C.  $R_f$  = 0.5 (petroleum ether/ethyl acetate 7:1); 60.2 mg, yield 95%. <sup>1</sup>H NMR (300 MHz, Chloroform-*d*)  $\delta$  8.27 (d,  $J$  = 8.5 Hz, 2H), 8.14 (t,  $J$  = 8.5 Hz, 3H), 8.01 – 7.94 (m, 1H), 7.58 (tt,  $J$  = 7.3, 5.6 Hz, 2H), 2.65 (s, 3H). <sup>13</sup>C NMR (75 MHz, Chloroform-*d*)  $\delta$  196.60, 166.43, 152.94, 142.18, 141.33, 137.09, 129.38, 129.20, 128.19, 127.74, 125.65, 122.30, 26.98. HRMS (ESI)  $m/z$ :  $[M + H]^+$  Calcd for  $C_{15}H_{12}NO_3S_2$  318.0253; Found: 318.0256.

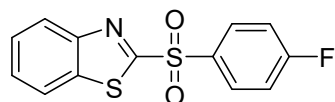

### 2-((4-fluorophenyl)sulfonyl)benzo[d]thiazole (3ah)<sup>2</sup>

White solid; mp: 153.2 – 155.1 °C.  $R_f$  = 0.5 (petroleum ether/ethyl acetate 7:1); 55.1 mg, yield 94%. <sup>1</sup>H NMR (300 MHz, Chloroform-*d*)  $\delta$  8.24 – 8.12 (m, 3H), 8.00 – 7.93 (m, 1H), 7.62 – 7.50 (m, 2H), 7.30 – 7.23 (m, 2H). <sup>13</sup>C NMR (75 MHz, Chloroform-*d*)  $\delta$  167.05, 166.4 (d,  $J$  = 256.5 Hz), 152.88, 136.97, 134.47, 132.00 (d,  $J$  = 9.75 Hz),

127.84 (d,  $J = 29.25$  Hz), 125.53, 122.28, 117.15, 116.85.  $^{19}\text{F}$  NMR (282 MHz, Chloroform-*d*)  $\delta$  -101.41. HRMS (ESI)  $m/z$ :  $[\text{M} + \text{H}]^+$  Calcd for  $\text{C}_{13}\text{H}_9\text{FNO}_2\text{S}_2$  294.0053; Found:294.0056.

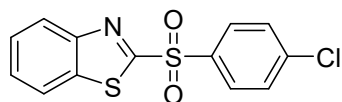

### 2-((4-chlorophenyl)sulfonyl)benzo[d]thiazole (3ai)<sup>2</sup>

White solid; mp: 155.7 – 157.1 °C.  $R_f = 0.5$  (petroleum ether/ethyl acetate 7:1); 57.5 mg, yield 93%.  $^1\text{H}$  NMR (300 MHz, Chloroform-*d*)  $\delta$  8.21 – 8.05 (m, 3H), 8.02 – 7.93 (m, 1H), 7.64 – 7.50 (m, 4H).  $^{13}\text{C}$  NMR (75 MHz, Chloroform-*d*)  $\delta$  166.80, 152.90, 141.58, 137.01, 136.90, 130.44, 129.93, 128.09, 127.68, 125.58, 122.29. HRMS (ESI)  $m/z$ :  $[\text{M} + \text{H}]^+$  Calcd for  $\text{C}_{13}\text{H}_9\text{ClNO}_2\text{S}_2$  309.9758; Found: 309.9760.

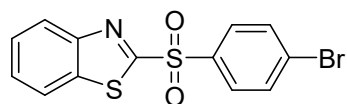

### 2-((4-bromophenyl)sulfonyl)benzo[d]thiazole (3aj)<sup>2</sup>

White solid; mp: 161.6 – 162.4 °C.  $R_f = 0.5$  (petroleum ether/ethyl acetate 7:1); 62.8 mg, yield 89%.  $^1\text{H}$  NMR (300 MHz, Chloroform-*d*)  $\delta$  8.20 – 8.11 (m, 1H), 8.06 – 7.92 (m, 3H), 7.72 (d,  $J = 8.6$  Hz, 2H), 7.63 – 7.52 (m, 2H).  $^{13}\text{C}$  NMR (75 MHz, Chloroform-*d*)  $\delta$  166.75, 152.92, 137.47, 137.02, 132.92, 130.45, 130.28, 128.08, 127.67, 125.61, 122.27. HRMS (ESI)  $m/z$ :  $[\text{M} + \text{H}]^+$  Calcd for  $\text{C}_{13}\text{H}_9\text{BrNO}_2\text{S}_2$  353.9253; Found: 353.9255.

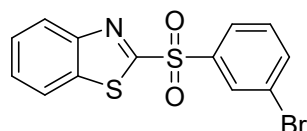

### 2-((3-bromophenyl)sulfonyl)benzo[d]thiazole (3ak)<sup>2</sup>

White solid; mp: 170.2 – 171.8 °C.  $R_f = 0.5$  (petroleum ether/ethyl acetate 7:1); 49.4 mg, yield 70%.  $^1\text{H}$  NMR (300 MHz, Chloroform-*d*)  $\delta$  8.30 (s, 1H), 8.18 (dd,  $J = 7.3$ , 1.8 Hz, 1H), 8.11 (d,  $J = 7.9$  Hz, 1H), 8.02 – 7.96 (m, 1H), 7.79 (d,  $J = 8.3$  Hz, 1H), 7.62 – 7.54 (m, 2H), 7.47 (t,  $J = 7.9$  Hz, 1H).  $^{13}\text{C}$  NMR (75 MHz, Chloroform-*d*)  $\delta$  166.45, 152.93, 140.32, 137.66, 137.11, 131.70, 131.03, 128.15, 127.72, 127.57, 125.69, 123.47, 122.29. HRMS (ESI)  $m/z$ :  $[\text{M} + \text{H}]^+$  Calcd for  $\text{C}_{13}\text{H}_9\text{BrNO}_2\text{S}_2$  353.9253; Found: 353.9249.

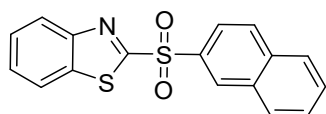

### 2-((naphthalen-2-yl)sulfonyl)benzo[d]thiazole (3al)<sup>2</sup>

White solid; mp: 158.6 – 159.9 °C.  $R_f = 0.5$  (petroleum ether/ethyl acetate 7:1); 60.5 mg, yield 93%.  $^1\text{H}$  NMR (300 MHz, Chloroform-*d*)  $\delta$  8.77 (s, 1H), 8.16 – 7.87 (m,

6H), 7.70 – 7.49 (m, 4H). <sup>13</sup>C NMR (75 MHz, Chloroform-*d*) δ 167.36, 152.93, 137.07, 135.68, 135.24, 132.20, 131.16, 129.92, 129.72, 128.04, 127.90, 127.54, 125.56, 123.16, 122.23. HRMS (ESI) *m/z*: [M + H]<sup>+</sup> Calcd for C<sub>17</sub>H<sub>12</sub>NO<sub>2</sub>S<sub>2</sub> 326.0304; Found: 326.0307.

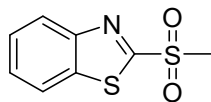

#### 2-(methylsulfonyl)benzo[*d*]thiazole (3am)<sup>1</sup>

White solid; mp: 185.3 – 186.9 °C. *R<sub>f</sub>* = 0.5 (petroleum ether/ethyl acetate 6:1); 42.2 mg, yield 99%. <sup>1</sup>H NMR (300 MHz, Chloroform-*d*) δ 8.24 – 8.16 (m, 1H), 8.04 – 7.98 (m, 1H), 7.68 – 7.56 (m, 2H), 3.42 (s, 3H). <sup>13</sup>C NMR (75 MHz, Chloroform-*d*) δ 166.36, 152.42, 136.59, 128.16, 127.76, 125.38, 122.44, 42.49. HRMS (ESI) *m/z*: [M + H]<sup>+</sup> Calcd for C<sub>8</sub>H<sub>8</sub>NO<sub>2</sub>S<sub>2</sub> 213.9991; Found: 213.9992.

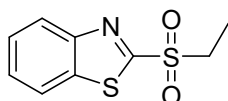

#### 2-(ethylsulfonyl)benzo[*d*]thiazole (3an)<sup>4</sup>

White solid; mp: 91.9 – 93.4 °C. *R<sub>f</sub>* = 0.5 (petroleum ether/ethyl acetate 6:1); 44.5 mg, yield 98%. <sup>1</sup>H NMR (300 MHz, Chloroform-*d*) δ 8.13 (d, *J* = 9.5 Hz, 1H), 7.96 (d, *J* = 7.7 Hz, 1H), 7.61 – 7.50 (m, 2H), 3.47 (q, *J* = 7.4 Hz, 2H), 1.36 (t, *J* = 7.4 Hz, 3H). <sup>13</sup>C NMR (75 MHz, Chloroform-*d*) δ 165.32, 152.76, 136.77, 128.06, 127.69, 125.46, 122.37, 49.35, 7.18. HRMS (ESI) *m/z*: [M + H]<sup>+</sup> Calcd for C<sub>9</sub>H<sub>10</sub>NO<sub>2</sub>S<sub>2</sub> 228.0147; Found: 228.0149.

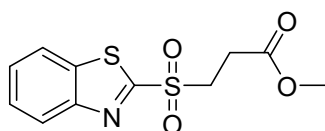

#### methyl 3-(benzo[*d*]thiazol-2-ylsulfonyl)propanoate (3ao)<sup>5</sup>

Colorless oily liquid. *R<sub>f</sub>* = 0.5 (petroleum ether/ethyl acetate 6:1); 52.5 mg, yield 92%. <sup>1</sup>H NMR (300 MHz, Chloroform-*d*) δ 8.25 – 8.19 (m, 1H), 8.06 – 7.99 (m, 1H), 7.69 – 7.57 (m, 2H), 3.89 – 3.82 (m, 2H), 3.67 (s, 3H), 3.01 – 2.93 (m, 2H). <sup>13</sup>C NMR (75 MHz, Chloroform-*d*) δ 170.10, 165.04, 152.61, 136.77, 128.26, 127.82, 125.52, 122.41, 52.48, 50.28, 27.57. HRMS (ESI) *m/z*: [M + H]<sup>+</sup> Calcd for C<sub>11</sub>H<sub>12</sub>NO<sub>4</sub>S<sub>2</sub> 286.0202; Found: 286.0219.

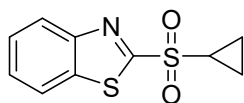

#### 2-(cyclopropylsulfonyl)benzo[*d*]thiazole (3ap)

White solid; mp: 118.8 – 119.6 °C. *R<sub>f</sub>* = 0.5 (petroleum ether/ethyl acetate 6:1); 46.9 mg, yield 98%. <sup>1</sup>H NMR (300 MHz, Chloroform-*d*) δ 8.23 (dd, *J* = 7.2, 1.6 Hz, 1H),



8.07 – 7.95 (m, 1H), 7.67 – 7.54(m, 2H), 2.89 (tt,  $J = 7.9, 4.7$  Hz, 1H), 1.59 – 1.49 (m, 2H), 1.25 – 1.17 (m, 2H).  $^{13}\text{C}$  NMR (75 MHz, Chloroform-*d*)  $\delta$  166.22, 152.76, 136.68, 127.96, 127.62, 125.46, 122.32, 31.70, 6.66. HRMS (ESI)  $m/z$ :  $[\text{M} + \text{H}]^+$  Calcd for  $\text{C}_{10}\text{H}_{10}\text{NO}_2\text{S}_2$  240.0147; Found: 240.0149.

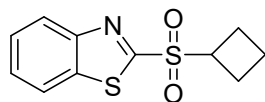

### 2-(cyclobutylsulfonyl)benzo[*d*]thiazole (3aq)

White solid; mp: 101.2 – 102.3 °C.  $R_f = 0.5$  (petroleum ether/ethyl acetate 6:1); 49.1 mg, yield 97%.  $^1\text{H}$  NMR (300 MHz, Chloroform-*d*)  $\delta$  8.21 (dd,  $J = 6.8, 1.4$  Hz, 1H), 8.01 (dd,  $J = 7.0, 1.8$  Hz, 1H), 7.67 – 7.54(m, 2H), 4.33 (p,  $J = 8.1$  Hz, 1H), 2.84 – 2.66 (m, 2H), 2.44 – 2.28 (m, 2H), 2.19 – 2.02 (m, 2H).  $^{13}\text{C}$  NMR (75 MHz, Chloroform-*d*)  $\delta$  164.95, 152.85, 136.80, 127.96, 127.61, 125.45, 122.32, 56.06, 22.72, 17.37. HRMS (ESI)  $m/z$ :  $[\text{M} + \text{H}]^+$  Calcd for  $\text{C}_{11}\text{H}_{12}\text{NO}_2\text{S}_2$  254.0304; Found: 254.0307.

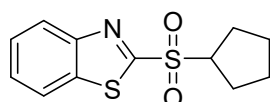

### 2-(cyclopentylsulfonyl)benzo[*d*]thiazole (3ar)<sup>6</sup>

White solid; mp: 113.4 – 114.9 °C.  $R_f = 0.5$  (petroleum ether/ethyl acetate 6:1); 51.8 mg, yield 97%.  $^1\text{H}$  NMR (300 MHz, Chloroform-*d*)  $\delta$  8.22 (dd,  $J = 7.6, 2.1$  Hz, 1H), 8.06 – 7.98 (m, 1H), 7.67 – 7.54(m, 2H), 4.04 (tt,  $J = 9.1, 6.7$  Hz, 1H), 2.26 (dq,  $J = 13.4, 7.1$  Hz, 2H), 2.11 – 1.97 (m, 2H), 1.83 (dd,  $J = 10.1, 5.4$  Hz, 2H), 1.75 – 1.60 (m, 2H).  $^{13}\text{C}$  NMR (75 MHz, Chloroform-*d*)  $\delta$  165.93, 152.87, 136.78, 127.96, 127.61, 125.43, 122.34, 63.29, 27.13, 26.03. HRMS (ESI)  $m/z$ :  $[\text{M} + \text{H}]^+$  Calcd for  $\text{C}_{12}\text{H}_{14}\text{NO}_2\text{S}_2$  268.0460; Found: 268.0462.

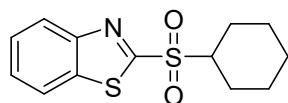

### 2-(cyclohexylsulfonyl)benzo[*d*]thiazole (3as)<sup>6</sup>

White solid; mp: 116.3 – 118.1 °C.  $R_f = 0.5$  (petroleum ether/ethyl acetate 6:1); 53.4 mg, yield 95%.  $^1\text{H}$  NMR (300 MHz, Chloroform-*d*)  $\delta$  8.24 (dd,  $J = 7.7, 2.1$  Hz, 1H), 8.08 – 7.98 (m, 1H), 7.67 – 7.54(m, 2H), 3.48 (tt,  $J = 12.2, 3.5$  Hz, 1H), 2.19 (d,  $J = 12.8$  Hz, 2H), 1.91 (d,  $J = 13.3$  Hz, 2H), 1.75 – 1.58 (m, 3H), 1.37 – 1.17 (m, 3H).  $^{13}\text{C}$  NMR (75 MHz, Chloroform-*d*)  $\delta$  165.04, 152.97, 136.98, 127.96, 127.61, 125.51, 122.31, 63.04, 25.11, 25.02, 24.98. HRMS (ESI)  $m/z$ :  $[\text{M} + \text{H}]^+$  Calcd for  $\text{C}_{13}\text{H}_{16}\text{NO}_2\text{S}_2$  282.0617; Found: 282.0619.

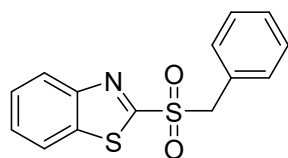

**2-(benzylsulfonyl)benzo[d]thiazole (3at)<sup>6</sup>**

White solid; mp: 109.7 – 110.9 °C.  $R_f$  = 0.5 (petroleum ether/ethyl acetate 15:1); 46.8 mg, yield 81%. <sup>1</sup>H NMR (300 MHz, Chloroform-*d*)  $\delta$  8.26 (d,  $J$  = 6.5 Hz, 1H), 7.94 (d,  $J$  = 7.9 Hz, 1H), 7.70 – 7.54 (m, 2H), 7.38 – 7.27 (m, 5H), 4.77 (s, 2H). <sup>13</sup>C NMR (75 MHz, Chloroform-*d*)  $\delta$  165.16, 152.57, 137.08, 131.15, 129.27, 128.94, 128.05, 127.70, 126.32, 125.51, 122.32, 121.39, 61.06. HRMS (ESI)  $m/z$ : [M + H]<sup>+</sup> Calcd for C<sub>14</sub>H<sub>12</sub>NO<sub>2</sub>S<sub>2</sub> 290.0304; Found: 290.0307.

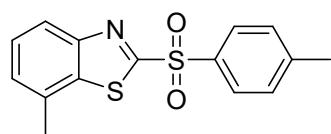

**7-methyl-2-tosylbenzo[d]thiazole (3ba)**

White solid; mp: 148.3 – 149.7 °C.  $R_f$  = 0.5 (petroleum ether/ethyl acetate 7:1); 56.4 mg, yield 93%. <sup>1</sup>H NMR (300 MHz, Chloroform-*d*)  $\delta$  7.93 (dd,  $J$  = 16.8, 8.3 Hz, 3H), 7.40 (t,  $J$  = 7.8 Hz, 1H), 7.26 (dd,  $J$  = 18.0, 7.7 Hz, 3H), 2.51 (s, 3H), 2.35 (s, 3H). <sup>13</sup>C NMR (75 MHz, Chloroform-*d*)  $\delta$  167.03, 152.80, 145.89, 137.77, 135.54, 132.45, 130.22, 128.99, 127.76, 127.71, 122.93, 21.78, 21.24. HRMS (ESI)  $m/z$ : [M + H]<sup>+</sup> Calcd for C<sub>15</sub>H<sub>14</sub>NO<sub>2</sub>S<sub>2</sub> 304.0460; Found: 304.0463.

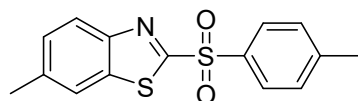

**6-methyl-2-tosylbenzo[d]thiazole (3bb)<sup>1</sup>**

White solid; mp: 142.8 – 144.1 °C.  $R_f$  = 0.5 (petroleum ether/ethyl acetate 7:1); 59.4 mg, yield 98%. <sup>1</sup>H NMR (300 MHz, Chloroform-*d*)  $\delta$  7.94 (s, 2H), 7.81 (s, 1H), 7.69 (d,  $J$  = 8.3 Hz, 1H), 7.30 – 7.20 (m, 3H), 2.38 (s, 3H), 2.31 (s, 3H). <sup>13</sup>C NMR (75 MHz, Chloroform-*d*)  $\delta$  167.47, 153.31, 145.88, 137.88, 135.54, 134.07, 130.20, 129.69, 128.93, 125.11, 121.66, 21.77, 21.53. HRMS (ESI)  $m/z$ : [M + H]<sup>+</sup> Calcd for C<sub>15</sub>H<sub>14</sub>NO<sub>2</sub>S<sub>2</sub> 304.0460; Found: 304.0461.

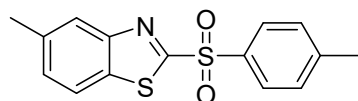

**5-methyl-2-tosylbenzo[d]thiazole (3bc)**

White solid; mp: 144.2 – 145.2 °C.  $R_f$  = 0.5 (petroleum ether/ethyl acetate 7:1); 59.4 mg, yield 98%. <sup>1</sup>H NMR (300 MHz, Chloroform-*d*)  $\delta$  8.01 (t,  $J$  = 8.3 Hz, 3H), 7.70 (s, 1H), 7.35 (d,  $J$  = 8.5 Hz, 3H), 2.49 (s, 3H), 2.41 (s, 3H). <sup>13</sup>C NMR (75 MHz, Chloroform-*d*)  $\delta$  166.31, 151.05, 145.85, 138.58, 137.28, 135.60, 130.20, 129.33, 128.91, 124.91, 121.66, 21.81, 21.77. HRMS (ESI)  $m/z$ : [M + H]<sup>+</sup> Calcd for

C<sub>15</sub>H<sub>14</sub>NO<sub>2</sub>S<sub>2</sub> 304.0460; Found: 304.0462.

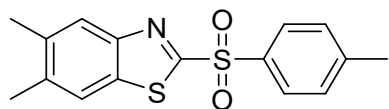

### 5,6-dimethyl-2-tosylbenzo[d]thiazole (3bd)

White solid; mp: 177.1 – 178.6 °C. *R<sub>f</sub>* = 0.5 (petroleum ether/ethyl acetate 7:1); 61.5 mg, yield 97%. <sup>1</sup>H NMR (300 MHz, Chloroform-*d*) δ 7.95 (d, *J* = 8.4 Hz, 2H), 7.82 (s, 1H), 7.61 (s, 1H), 7.28 (d, *J* = 8.1 Hz, 2H), 2.35 – 2.30 (m, 9H). <sup>13</sup>C NMR (75 MHz, Chloroform-*d*) δ 166.10, 151.79, 145.67, 138.11, 137.25, 135.78, 134.72, 130.14, 128.90, 125.24, 121.72, 21.76, 20.49, 20.30. HRMS (ESI) *m/z*: [M + H]<sup>+</sup> Calcd for C<sub>16</sub>H<sub>16</sub>NO<sub>2</sub>S<sub>2</sub> 318.0617; Found: 318.0619.

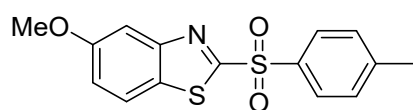

### 5-methoxy-2-tosylbenzo[d]thiazole (3be)

White solid; mp: 148.1 – 149.3 °C. *R<sub>f</sub>* = 0.5 (petroleum ether/ethyl acetate 7:1); 61.9 mg, yield 97%. <sup>1</sup>H NMR (300 MHz, Chloroform-*d*) δ 7.93 (dd, *J* = 16.9, 8.1 Hz, 3H), 7.40 (t, *J* = 7.8 Hz, 1H), 7.26 (dd, *J* = 18.1, 7.6 Hz, 3H), 2.51 (s, 3H), 2.35 (s, 3H). <sup>13</sup>C NMR (75 MHz, Chloroform-*d*) δ 167.03, 152.80, 145.89, 137.77, 135.54, 132.45, 130.22, 128.99, 127.76, 127.71, 122.93, 21.78, 21.24. HRMS (ESI) *m/z*: [M + H]<sup>+</sup> Calcd for C<sub>15</sub>H<sub>14</sub>NO<sub>3</sub>S<sub>2</sub> 320.0410; Found: 320.0411.

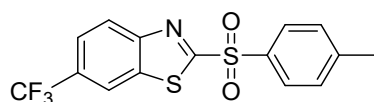

### 2-tosyl-6-(trifluoromethyl)benzo[d]thiazole (3bf)<sup>1</sup>

White solid; mp: 142.5 – 144.1 °C. *R<sub>f</sub>* = 0.5 (petroleum ether/ethyl acetate 7:1); 58.5 mg, yield 82%. <sup>1</sup>H NMR (300 MHz, Chloroform-*d*) δ 8.31 – 8.20 (m, 2H), 8.09 – 8.02 (m, 2H), 7.80 (d, *J* = 8.7 Hz, 1H), 7.40 (d, *J* = 8.2 Hz, 2H), 2.44 (s, 3H). <sup>13</sup>C NMR (75 MHz, Chloroform-*d*) δ 171.06, 154.66, 146.50, 136.91, 134.74, 130.40, 129.80 (q, *J* = 33Hz), 129.20, 126.05, 124.39 (q, *J* = 3Hz), 123.62 (q, *J* = 271.5Hz), 120.18 (q, *J* = 3.75Hz), 21.83. <sup>19</sup>F NMR (282 MHz, Chloroform-*d*) δ -61.30. HRMS (ESI) *m/z*: [M + H]<sup>+</sup> Calcd for C<sub>15</sub>H<sub>11</sub>F<sub>3</sub>NO<sub>2</sub>S<sub>2</sub> 358.0178; Found: 358.0181.

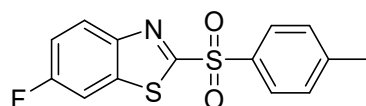

### 6-fluoro-2-tosylbenzo[d]thiazole (3bg)<sup>1</sup>

White solid; mp: 171.9 – 172.8 °C. *R<sub>f</sub>* = 0.5 (petroleum ether/ethyl acetate 7:1); 58.3 mg, yield 95%. <sup>1</sup>H NMR (300 MHz, Chloroform-*d*) δ 8.16 – 7.94 (m, 3H), 7.63 (dd, *J* = 7.9, 2.6 Hz, 1H), 7.43 – 7.28 (m, 3H), 2.44 (s, 3H). <sup>13</sup>C NMR (75 MHz, Chloroform-*d*) δ 167.38, 161.77 (d, *J* = 249.75Hz), 149.58, 146.11, 138.23 (d, *J* =

11.25Hz), 135.27, 130.29, 129.03, 126.89 (d,  $J = 9.75\text{Hz}$ ), 116.87 (d,  $J = 24.75\text{Hz}$ ), 108.25 (d,  $J = 26.25\text{Hz}$ ), 21.79.  $^{19}\text{F}$  NMR (282 MHz, Chloroform-*d*)  $\delta$  -110.47. HRMS (ESI)  $m/z$ :  $[\text{M} + \text{H}]^+$  Calcd for  $\text{C}_{14}\text{H}_{11}\text{FNO}_2\text{S}_2$  308.0210; Found: 308.0213.

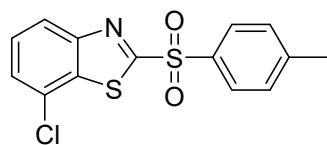

### 7-chloro-2-tosylbenzo[d]thiazole (3bh)

White solid; mp: 182.6 – 184.4 °C.  $R_f = 0.5$  (petroleum ether/ethyl acetate 7:1); 27.1 mg, yield 42%.  $^1\text{H}$  NMR (300 MHz, Chloroform-*d*)  $\delta$  8.11 – 7.96 (m, 3H), 7.57 – 7.46 (m, 2H), 7.39 (d,  $J = 8.2$  Hz, 2H), 2.44 (s, 3H).  $^{13}\text{C}$  NMR (75 MHz, Chloroform-*d*)  $\delta$  168.62, 153.30, 146.28, 137.41, 135.06, 130.34, 129.12, 128.42, 127.34, 127.24, 123.82, 21.81. HRMS (ESI)  $m/z$ :  $[\text{M} + \text{H}]^+$  Calcd for  $\text{C}_{14}\text{H}_{11}\text{ClNO}_2\text{S}_2$  323.9914; Found: 323.9917.

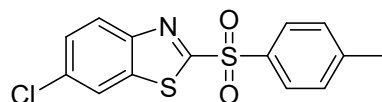

### 6-chloro-2-tosylbenzo[d]thiazole (3bi)<sup>1</sup>

White solid; mp: 184.7 – 186.1 °C.  $R_f = 0.5$  (petroleum ether/ethyl acetate 7:1); 59.4 mg, yield 92%.  $^1\text{H}$  NMR (300 MHz, Chloroform-*d*)  $\delta$  8.04 (dd,  $J = 8.6, 3.2$  Hz, 3H), 7.93 (d,  $J = 2.1$  Hz, 1H), 7.52 (dd,  $J = 8.8, 2.1$  Hz, 1H), 7.39 (d,  $J = 8.1$  Hz, 2H), 2.44 (s, 3H).  $^{13}\text{C}$  NMR (75 MHz, Chloroform-*d*)  $\delta$  168.23, 151.38, 146.21, 138.06, 135.13, 134.08, 130.31, 129.07, 128.58, 126.26, 121.77, 21.81. HRMS (ESI)  $m/z$ :  $[\text{M} + \text{H}]^+$  Calcd for  $\text{C}_{14}\text{H}_{11}\text{ClNO}_2\text{S}_2$  323.9914; Found: 323.9915.

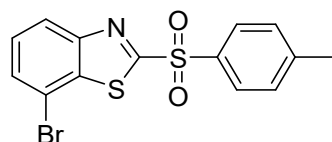

### 7-bromo-2-tosylbenzo[d]thiazole (3bk)

White solid; mp: 161.7 – 162.9 °C.  $R_f = 0.5$  (petroleum ether/ethyl acetate 7:1); 29.4 mg, yield 40%.  $^1\text{H}$  NMR (300 MHz, Chloroform-*d*)  $\delta$  8.11 (d,  $J = 8.3$  Hz, 1H), 8.06 (d,  $J = 8.0$  Hz, 2H), 7.67 (d,  $J = 7.7$  Hz, 1H), 7.48 (t,  $J = 8.0$  Hz, 1H), 7.42 (s, 1H), 7.40 (s, 1H), 2.46 (s, 3H).  $^{13}\text{C}$  NMR (75 MHz, Chloroform-*d*)  $\delta$  168.06, 152.46, 146.24, 140.12, 135.09, 130.41, 130.33, 129.13, 128.61, 124.34, 114.23, 21.82. HRMS (ESI)  $m/z$ :  $[\text{M} + \text{H}]^+$  Calcd for  $\text{C}_{14}\text{H}_{11}\text{BrNO}_2\text{S}_2$  367.9409; Found: 367.9411.

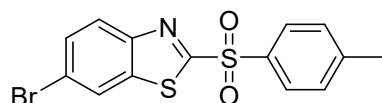

### 6-bromo-2-tosylbenzo[d]thiazole (3bl)<sup>1</sup>

White solid; mp: 185.2 – 186.6 °C.  $R_f = 0.5$  (petroleum ether/ethyl acetate 7:1); 67.5

mg, yield 92%. <sup>1</sup>H NMR (300 MHz, Chloroform-*d*) δ 8.17 – 7.83 (m, 4H), 7.64 (dd, *J* = 8.8, 1.9 Hz, 1H), 7.38 (d, *J* = 8.0 Hz, 2H), 2.43 (s, 3H). <sup>13</sup>C NMR (75 MHz, Chloroform-*d*) δ 168.24, 151.67, 146.24, 138.42, 135.09, 131.23, 130.33, 129.06, 126.49, 124.76, 121.88, 21.82. HRMS (ESI) *m/z*: [M + H]<sup>+</sup> Calcd for C<sub>14</sub>H<sub>11</sub>BrNO<sub>2</sub>S<sub>2</sub> 367.9409; Found: 367.9412.

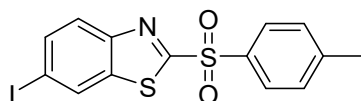

#### 6-iodo-2-tosylbenzo[*d*]thiazole (3bm)

White solid; mp: 174.6 – 176.1 °C. *R<sub>f</sub>* = 0.5 (petroleum ether/ethyl acetate 7:1); 69.7 mg, yield 84%. <sup>1</sup>H NMR (300 MHz, Chloroform-*d*) δ 8.30 (s, 1H), 8.03 (d, *J* = 8.4 Hz, 2H), 7.84 (d, *J* = 0.7 Hz, 2H), 7.38 (d, *J* = 7.8 Hz, 2H), 2.43 (s, 3H). <sup>13</sup>C NMR (75 MHz, Chloroform-*d*) δ 168.15, 152.15, 146.21, 138.76, 136.75, 135.10, 130.75, 130.32, 129.07, 126.71, 93.01, 21.82. HRMS (ESI) *m/z*: [M + H]<sup>+</sup> Calcd for C<sub>14</sub>H<sub>11</sub>INO<sub>2</sub>S<sub>2</sub> 415.9270; Found: 415.9272.

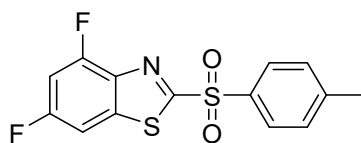

#### 4,6-difluoro-2-tosylbenzo[*d*]thiazole (3bn)<sup>1</sup>

White solid; mp: 164.8 – 165.6 °C. *R<sub>f</sub>* = 0.5 (petroleum ether/ethyl acetate 7:1); 61.8 mg, yield 95%. <sup>1</sup>H NMR (300 MHz, Chloroform-*d*) δ 7.96 (d, *J* = 8.4 Hz, 2H), 7.34 (dd, *J* = 17.7, 7.7 Hz, 3H), 6.99 (m, 1H), 2.37 (s, 3H). <sup>13</sup>C NMR (75 MHz, Chloroform-*d*) δ 167.94 (d, *J* = 3Hz) 163.44 (d, *J* = 10.5Hz), 160.09 (d, *J* = 10.5Hz), 156.46 (d, *J* = 13.5Hz), 154.95 (d, *J* = 13.5Hz), 146.37, 139.78 – 139.10 (m), 134.85, 130.34, 129.18, 104.44 – 103.51(m), 21.82. <sup>19</sup>F NMR (282 MHz, Chloroform-*d*) δ -106.58, -113.19. HRMS (ESI) *m/z*: [M + H]<sup>+</sup> Calcd for C<sub>14</sub>H<sub>10</sub>F<sub>2</sub>NO<sub>2</sub>S<sub>2</sub> 326.0116; Found: 326.0119.

### 3. Copies of NMR spectra of products 3

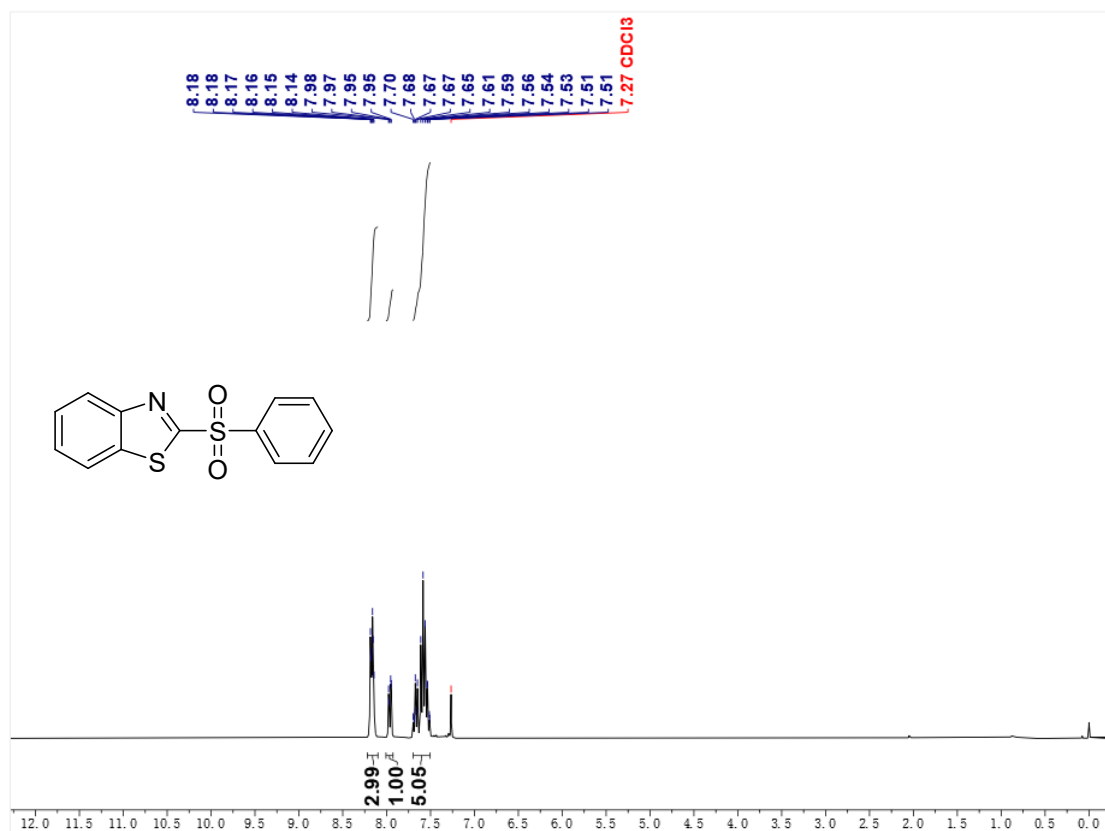

<sup>1</sup>H NMR (300 MHz, CDCl<sub>3</sub>) of 3aa.

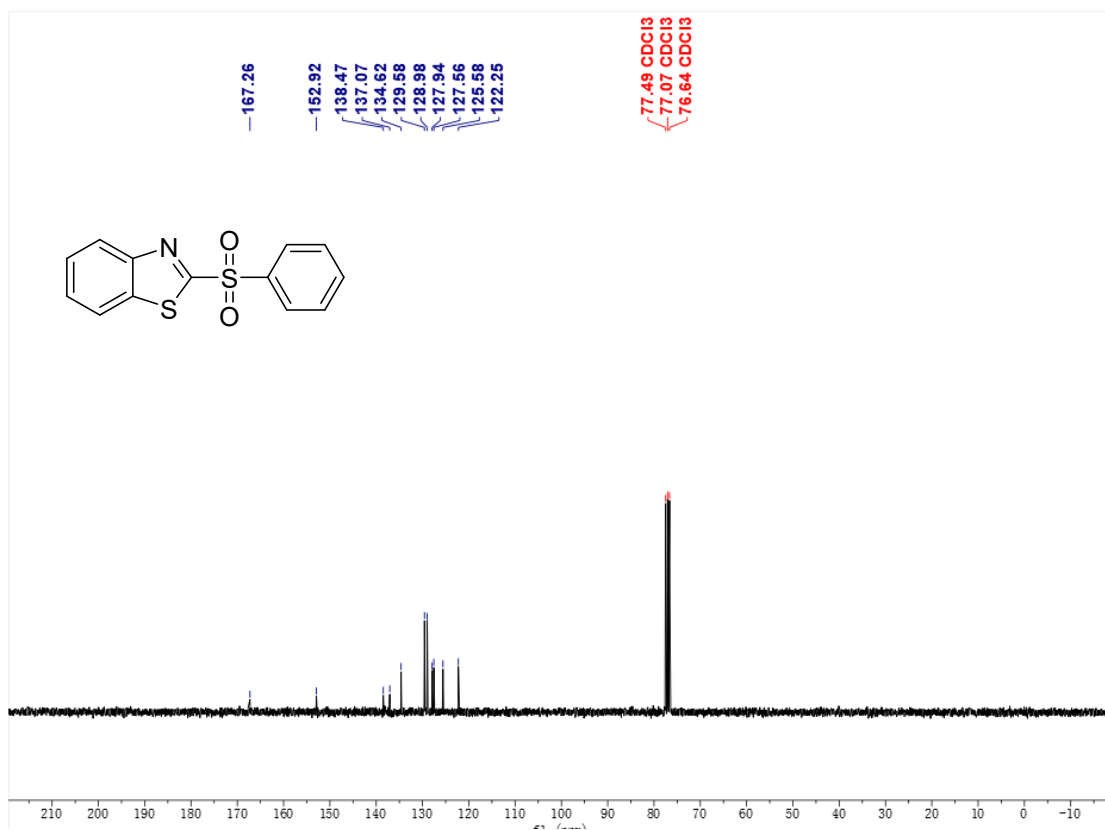

<sup>13</sup>C NMR (75 MHz, CDCl<sub>3</sub>) of 3aa.

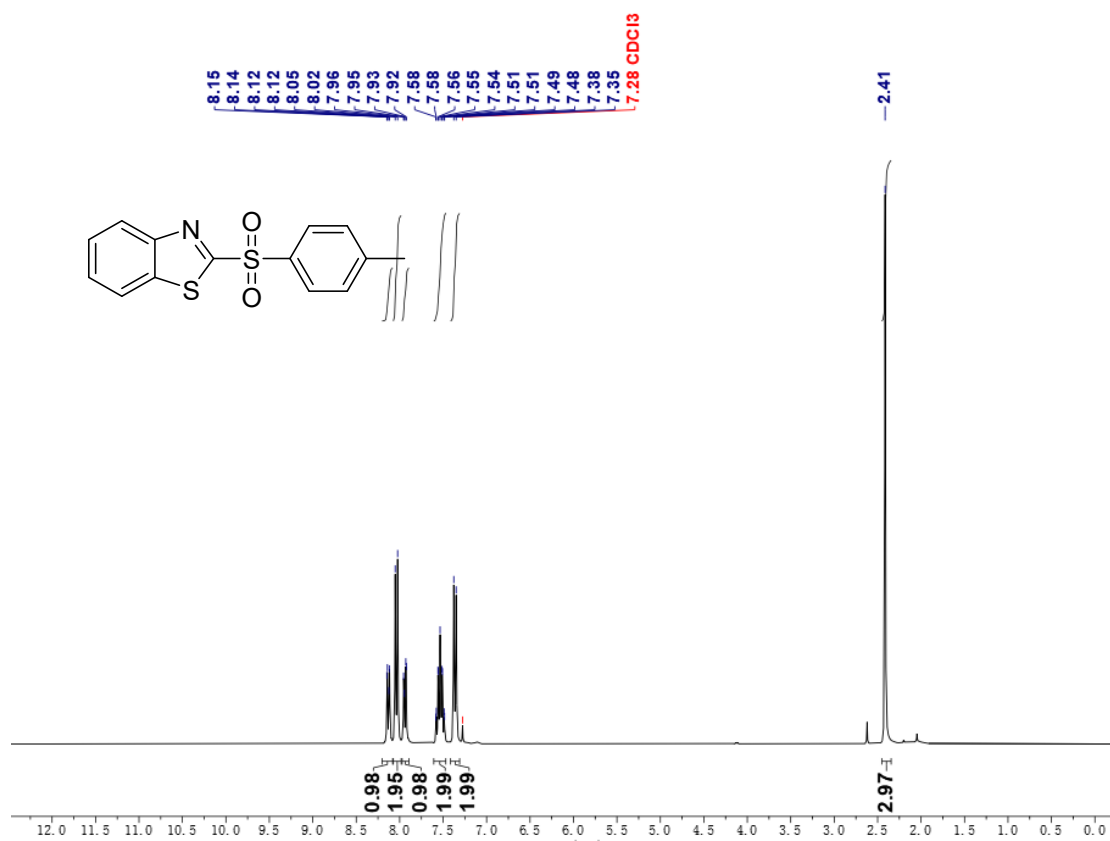

<sup>1</sup>H NMR (300 MHz, CDCl<sub>3</sub>) of **3ab**.

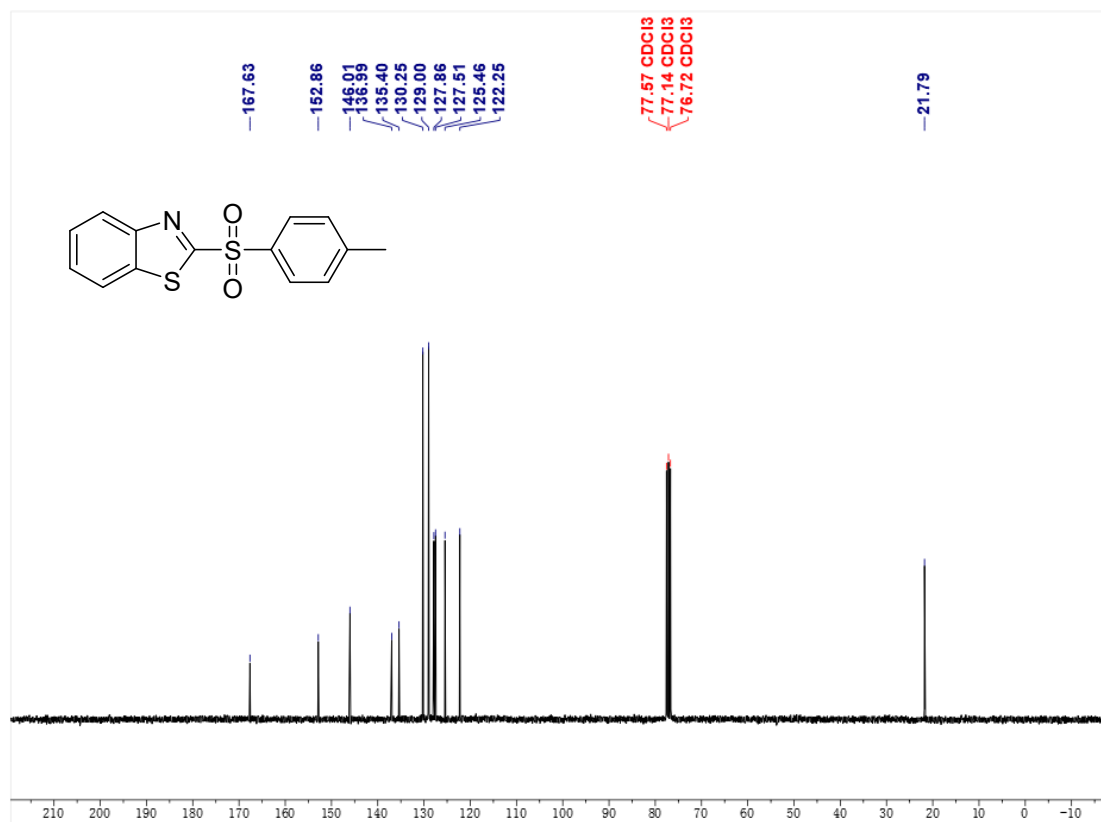

<sup>13</sup>C NMR (75 MHz, CDCl<sub>3</sub>) of **3ab**.

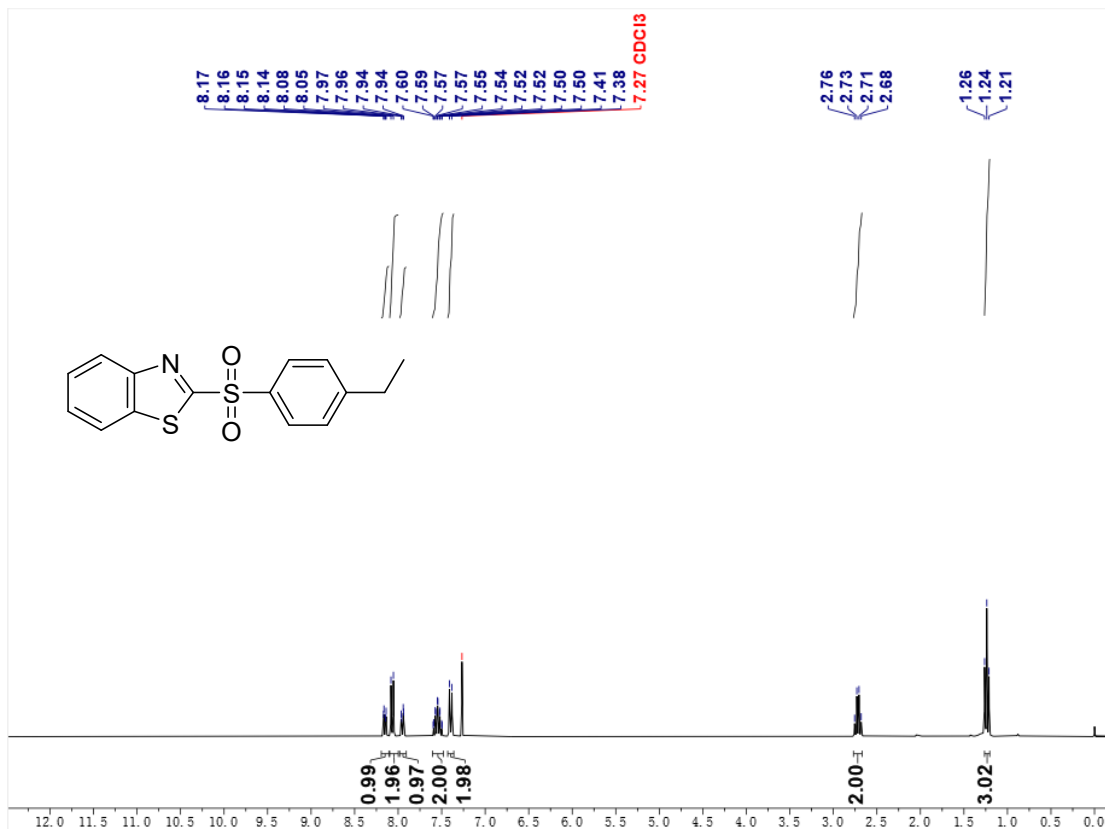

<sup>1</sup>H NMR (300 MHz, CDCl<sub>3</sub>) of 3ac.

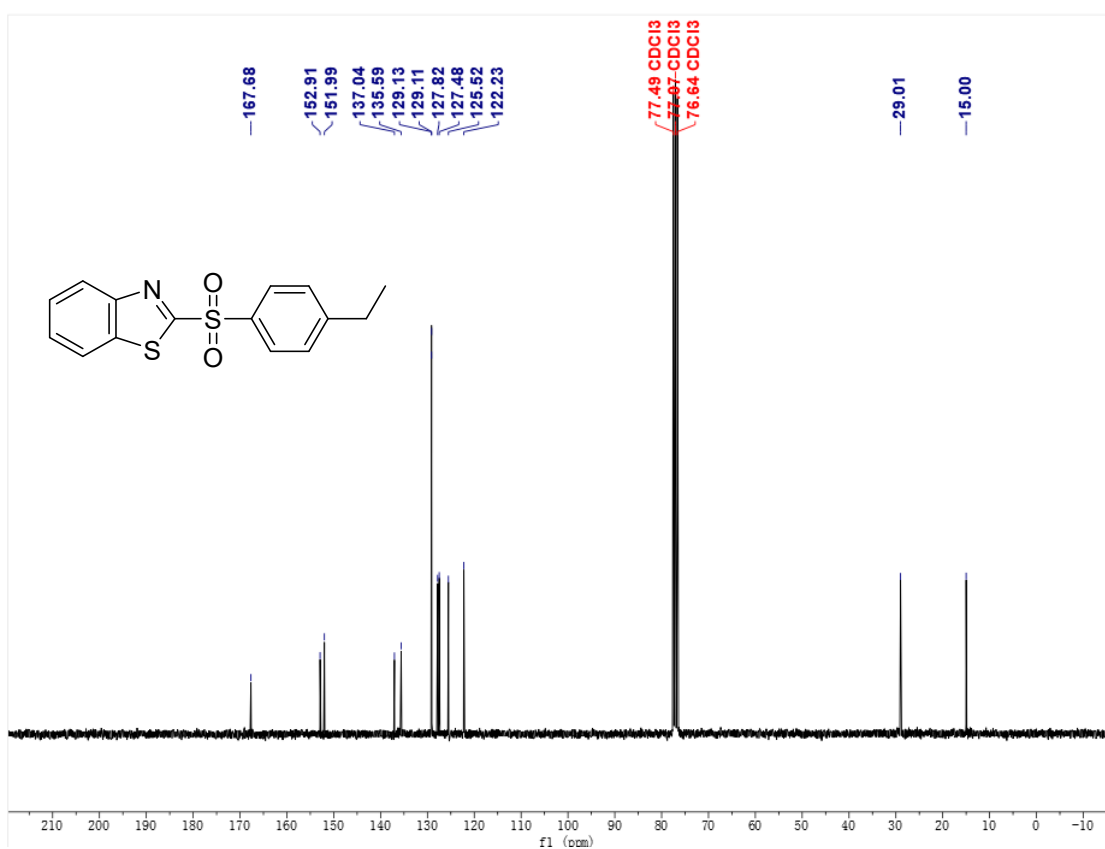

<sup>13</sup>C NMR (75 MHz, CDCl<sub>3</sub>) of 3ac.



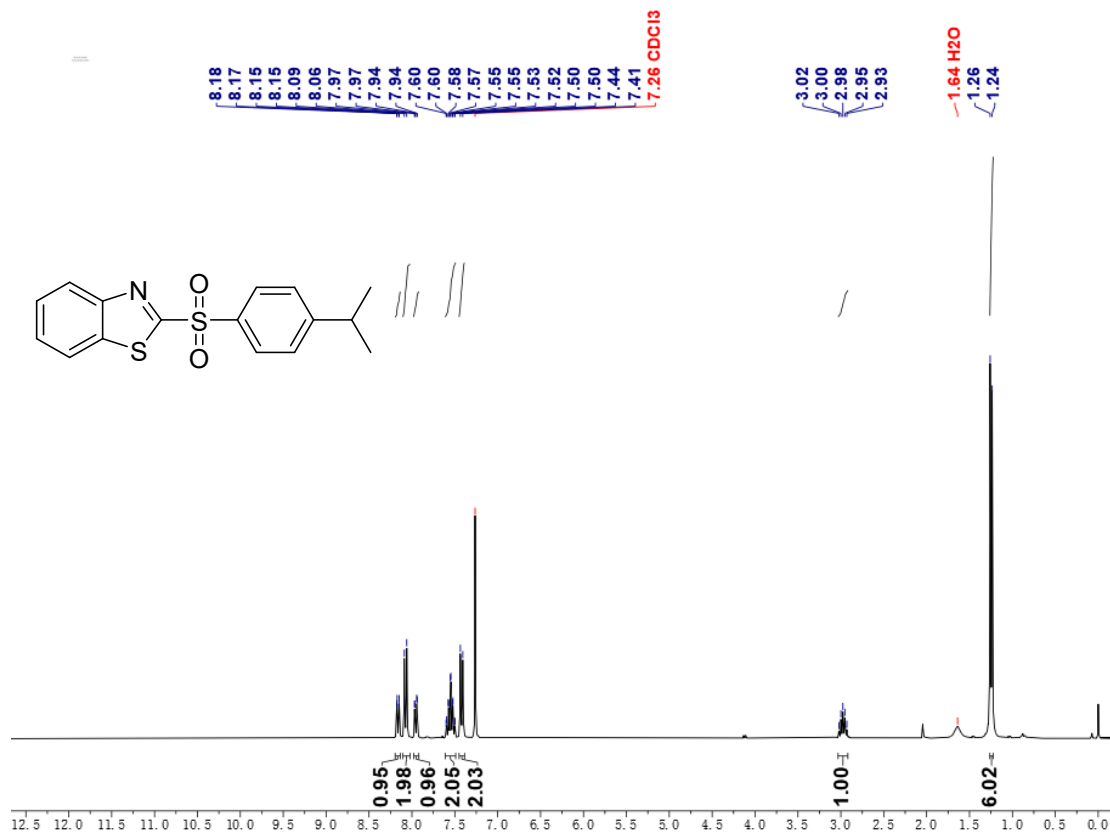

<sup>1</sup>H NMR (300 MHz, CDCl<sub>3</sub>) of **3ad**.

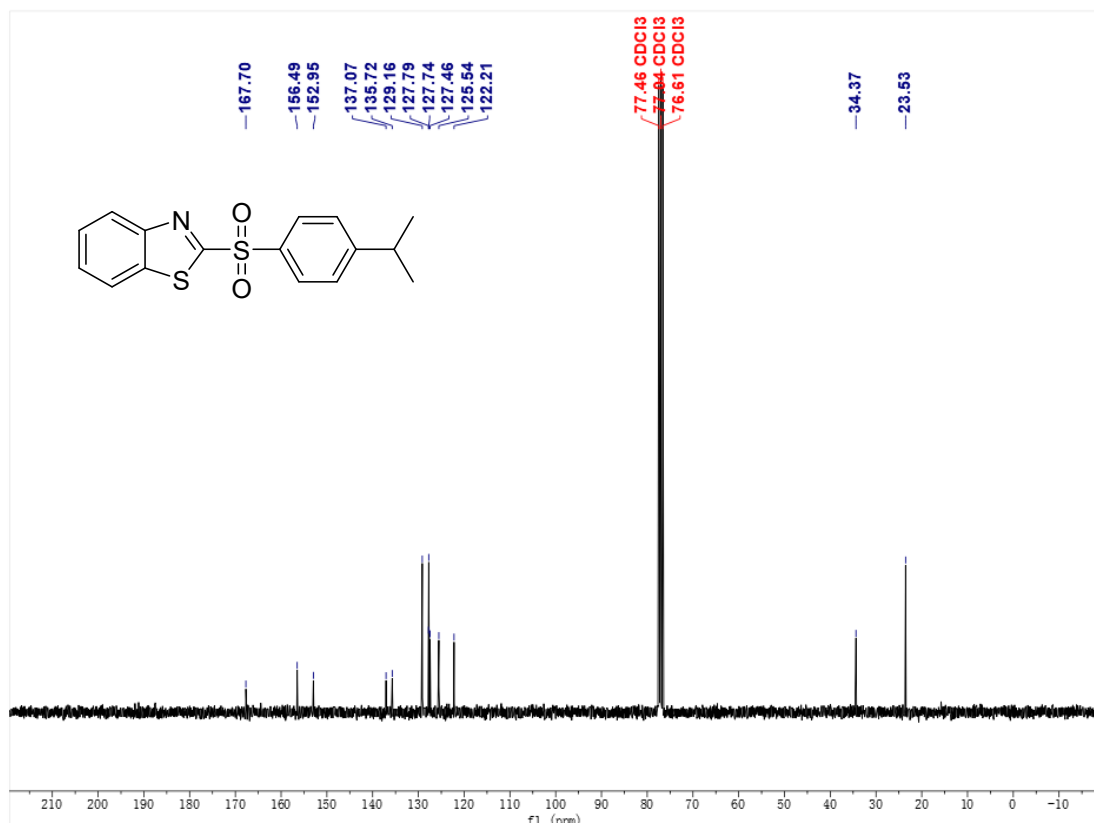

<sup>13</sup>C NMR (75 MHz, CDCl<sub>3</sub>) of **3ad**.

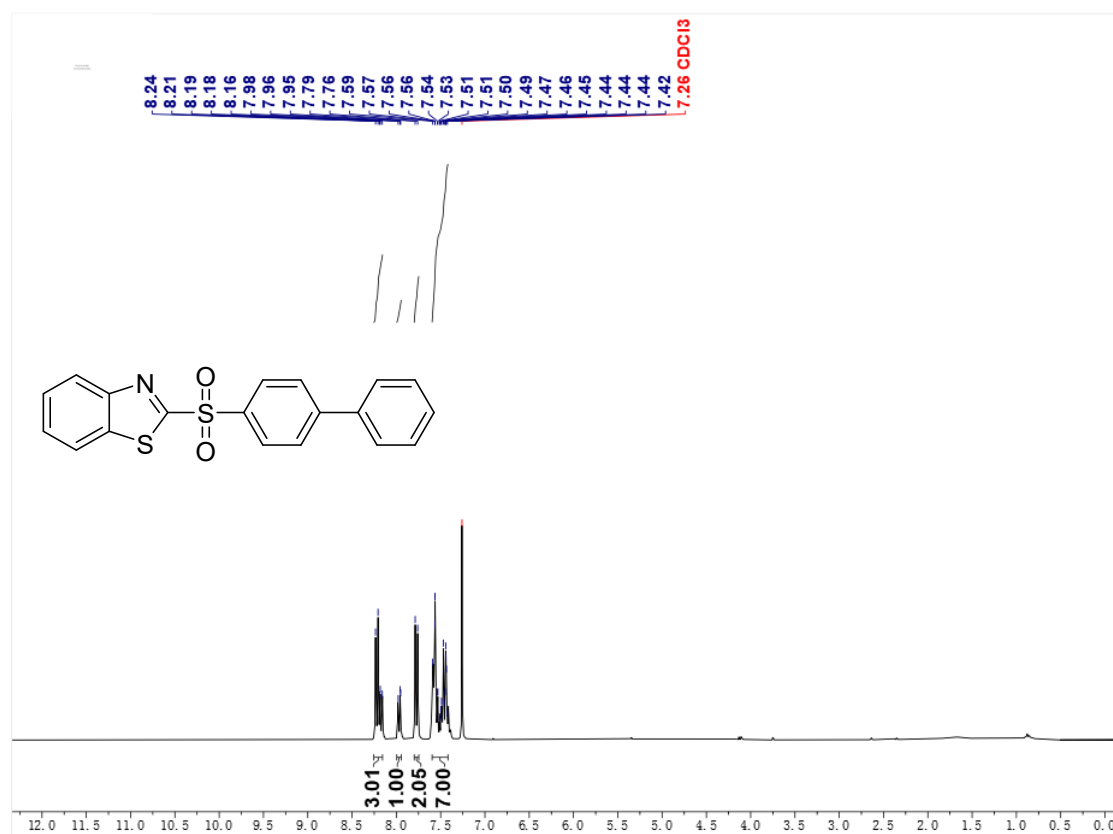

<sup>1</sup>H NMR (300 MHz, CDCl<sub>3</sub>) of 3ae.

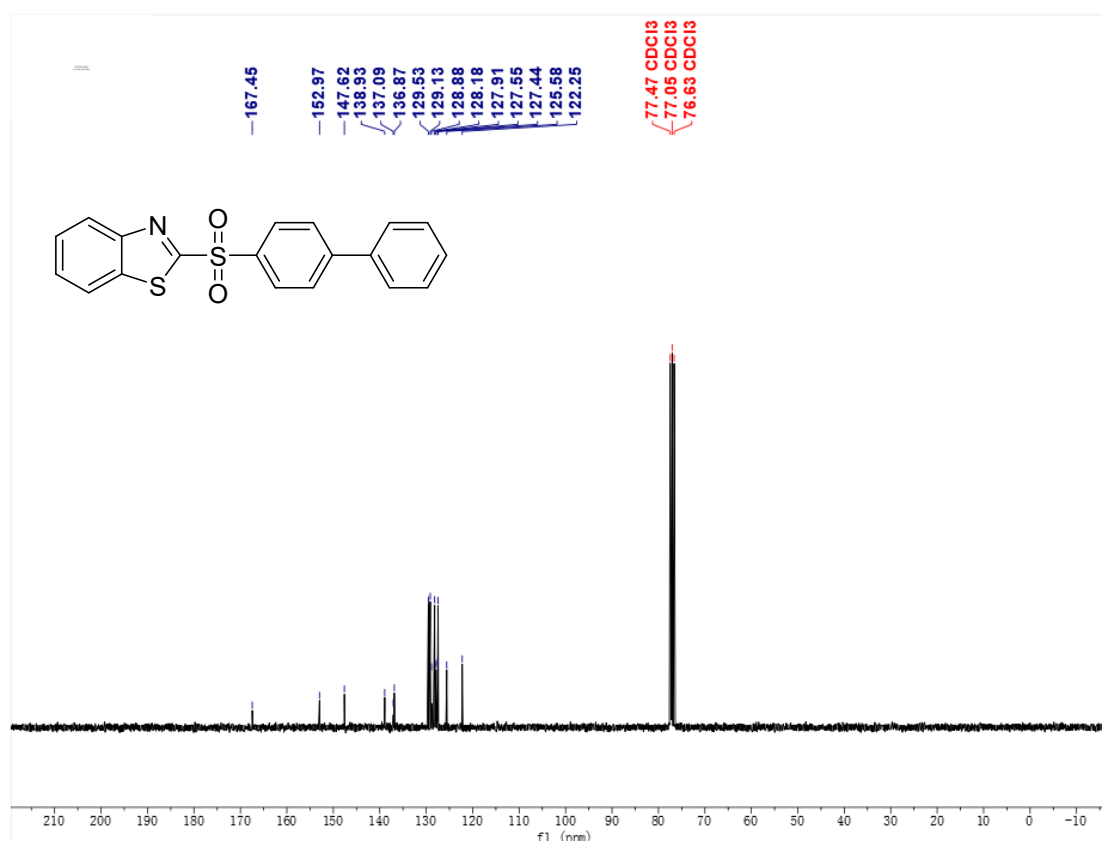

<sup>13</sup>C NMR (75 MHz, CDCl<sub>3</sub>) of 3ae.

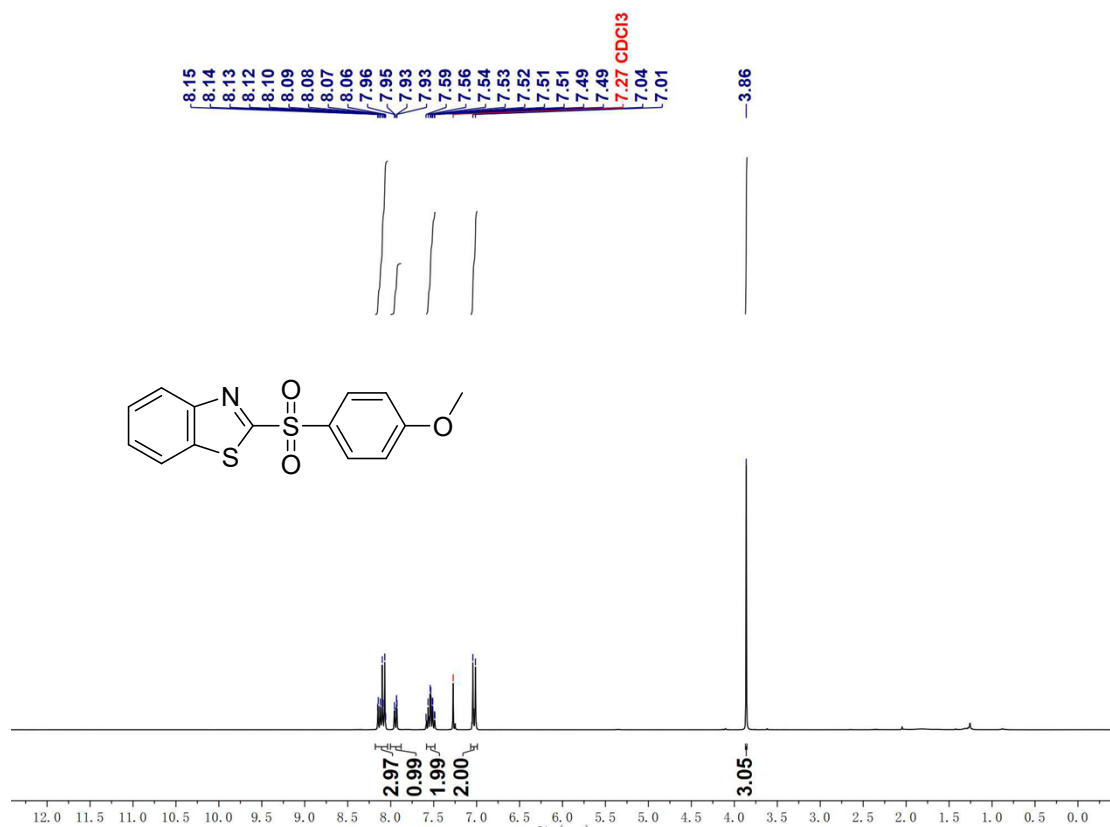

<sup>1</sup>H NMR (300 MHz, CDCl<sub>3</sub>) of 3af.

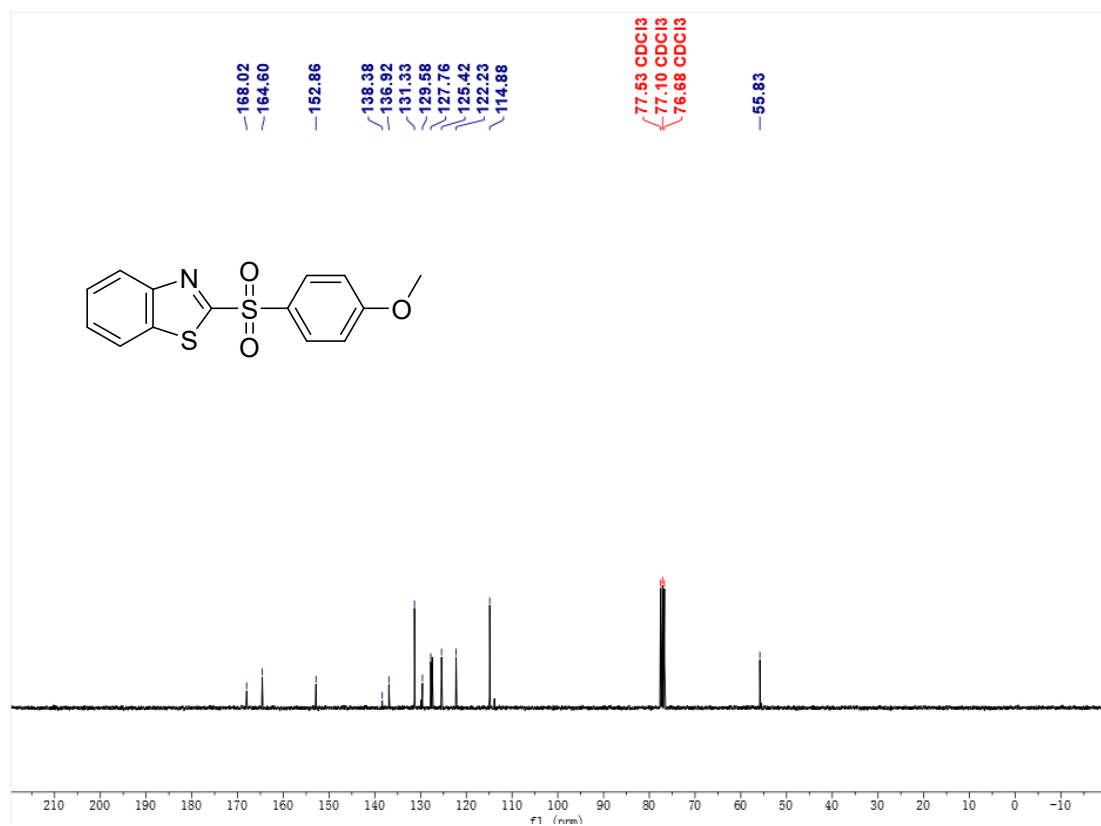

<sup>13</sup>C NMR (75 MHz, CDCl<sub>3</sub>) of 3af.

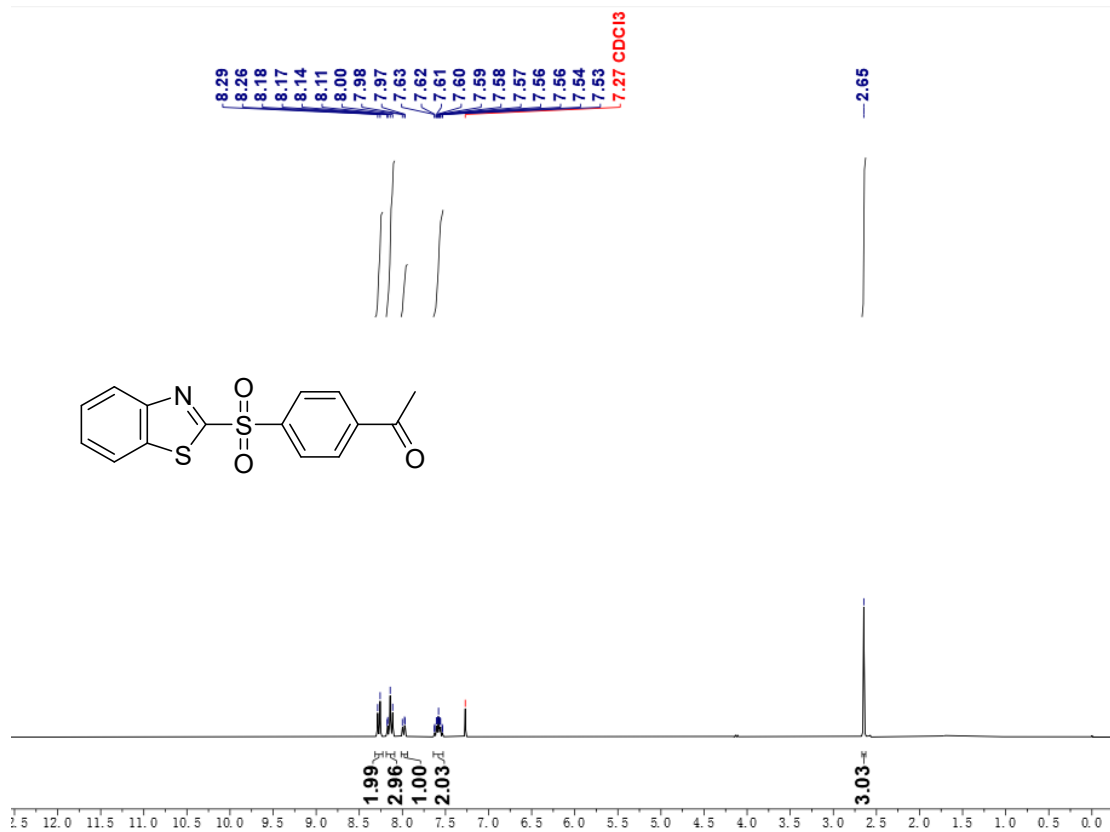

<sup>1</sup>H NMR (300 MHz, CDCl<sub>3</sub>) of **3ag**.

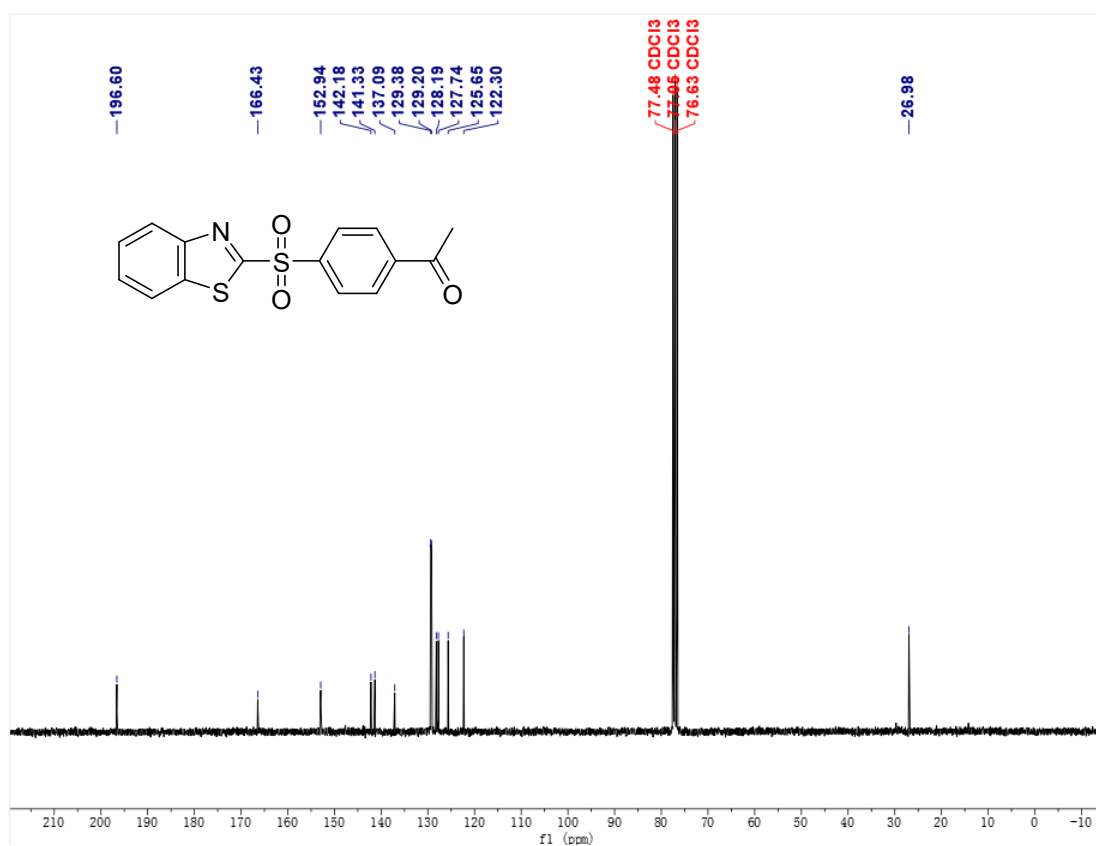

<sup>13</sup>C NMR (75 MHz, CDCl<sub>3</sub>) of **3ag**.

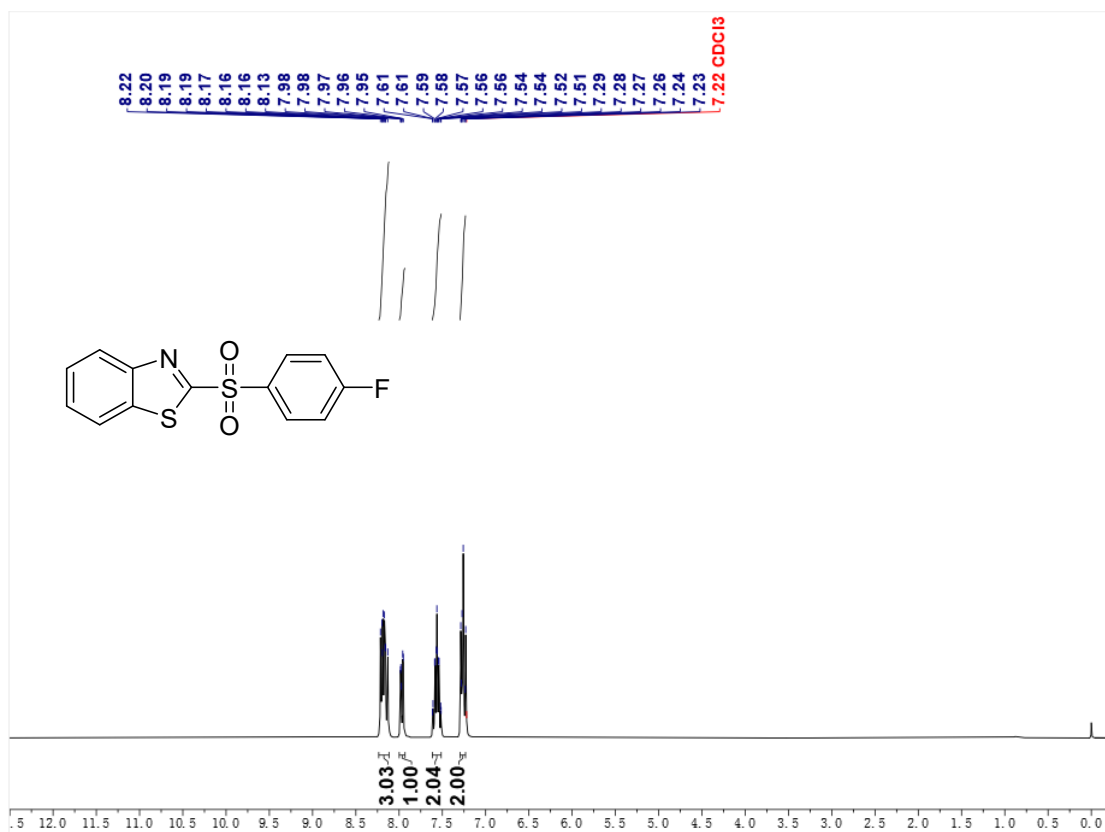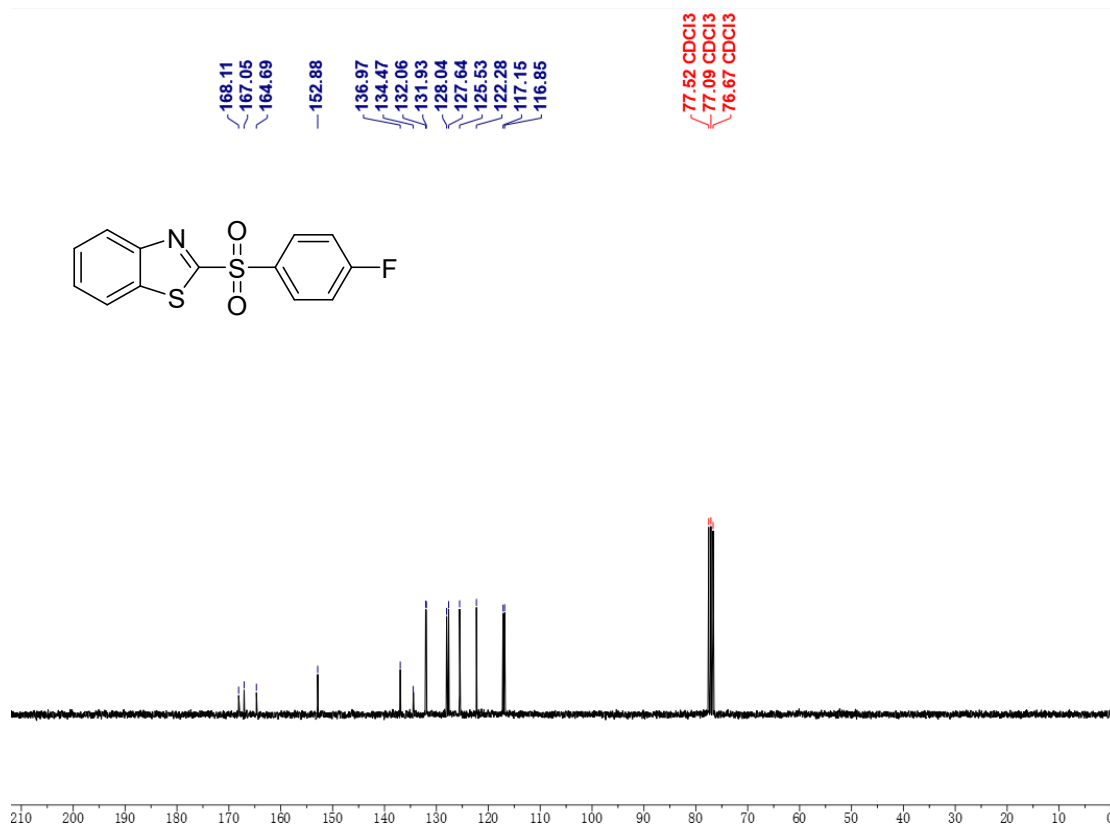

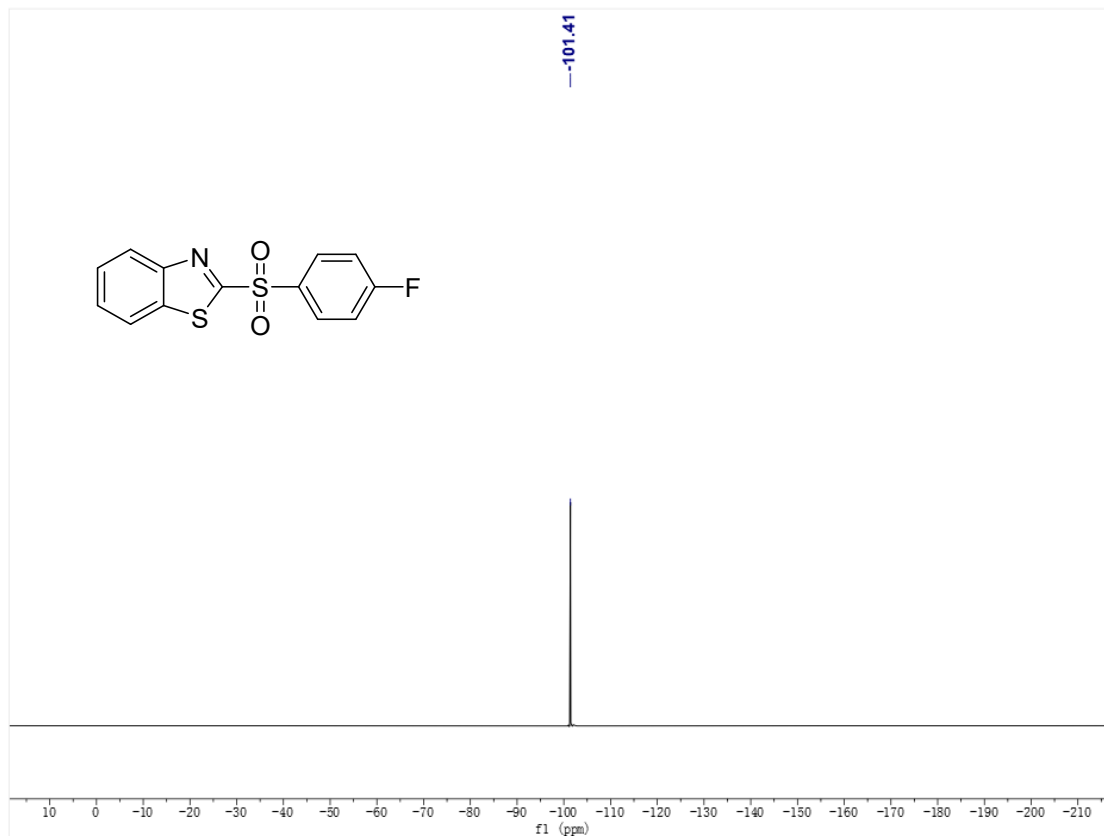

$^{19}\text{F}$  NMR (282 MHz,  $\text{CDCl}_3$ ) of **3ah**.

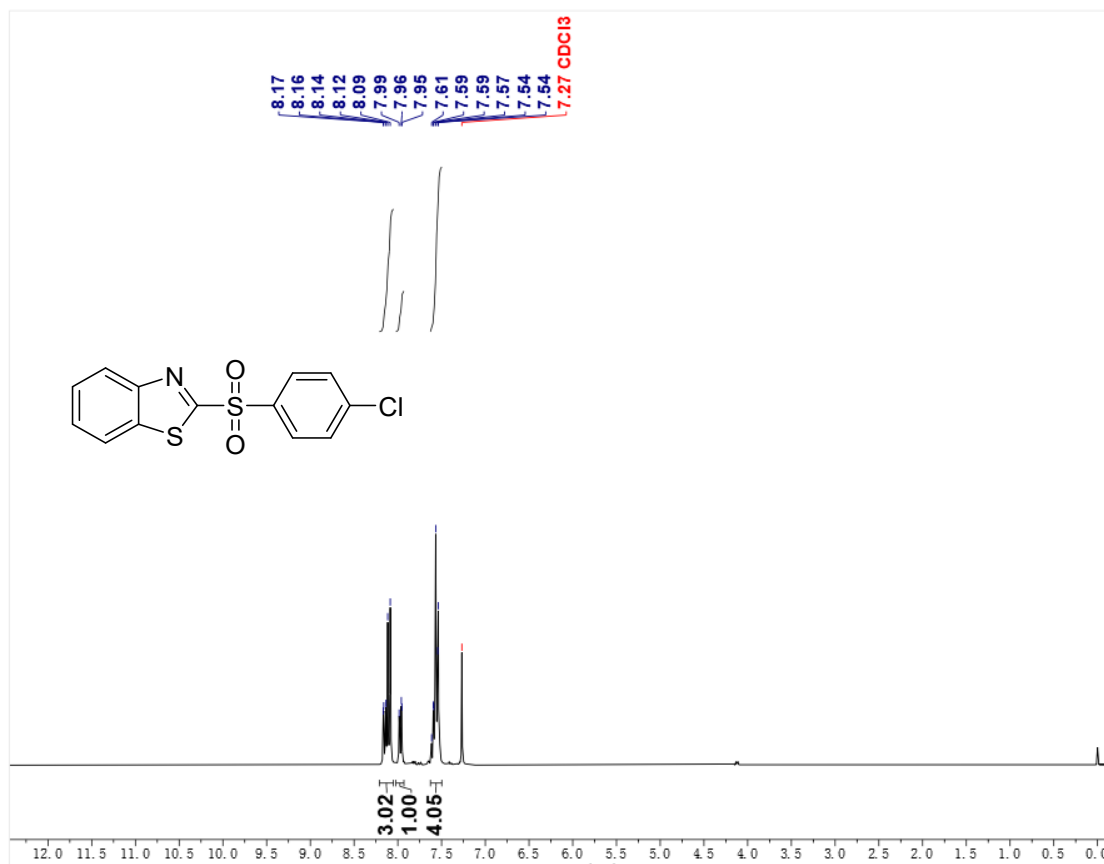

$^1\text{H}$  NMR (300 MHz,  $\text{CDCl}_3$ ) of **3ai**.

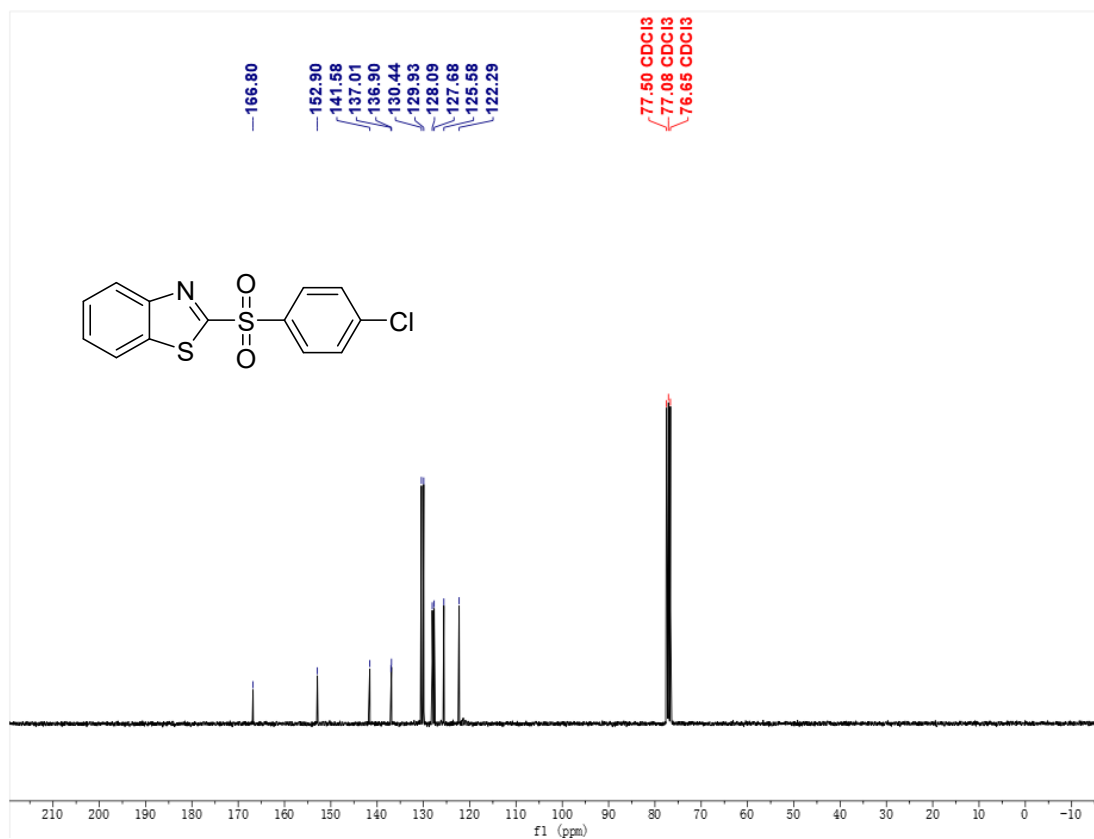

<sup>13</sup>C NMR (75 MHz, CDCl<sub>3</sub>) of **3ai**.

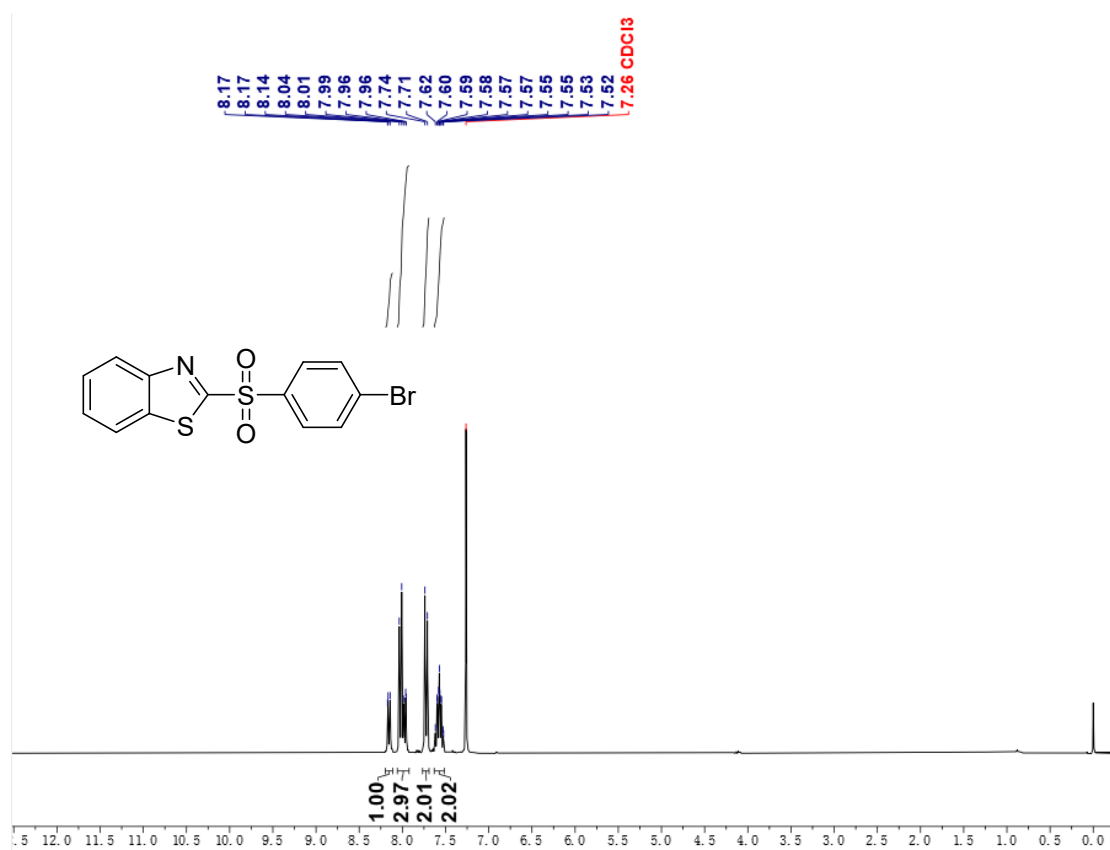

<sup>1</sup>H NMR (300 MHz, CDCl<sub>3</sub>) of **3aj**.

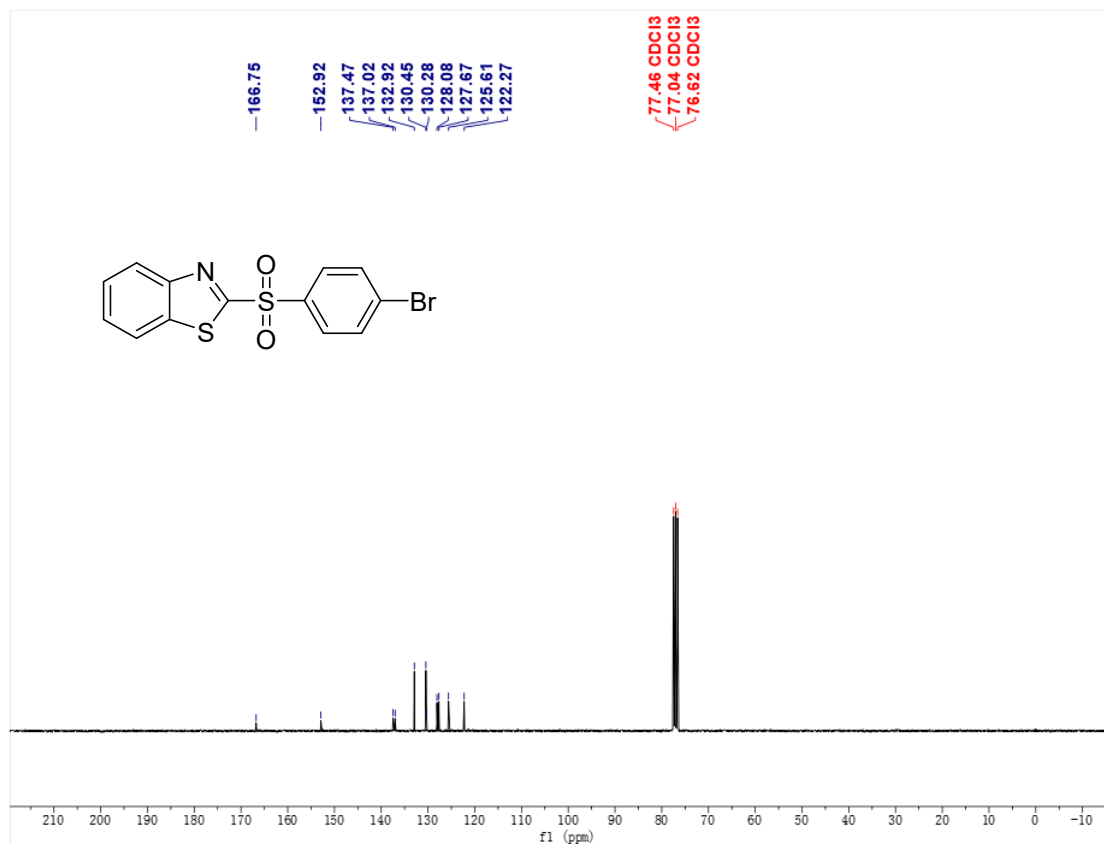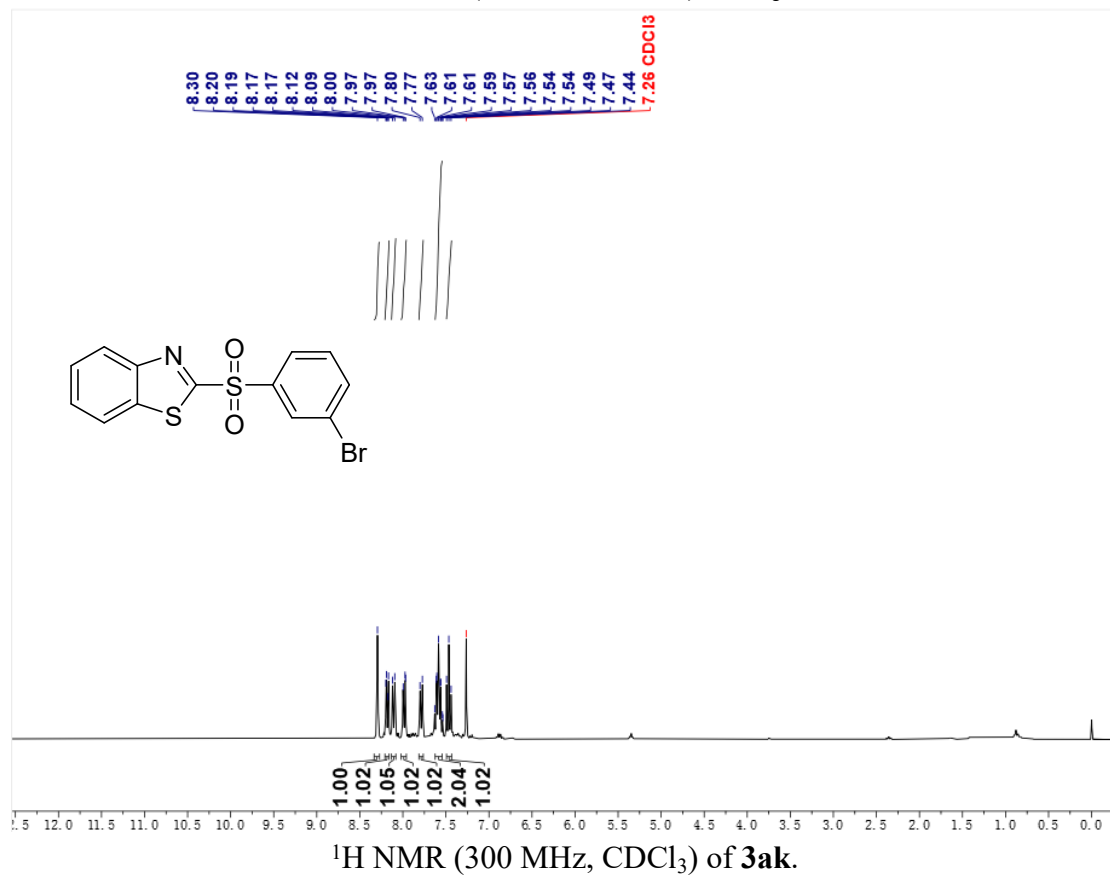



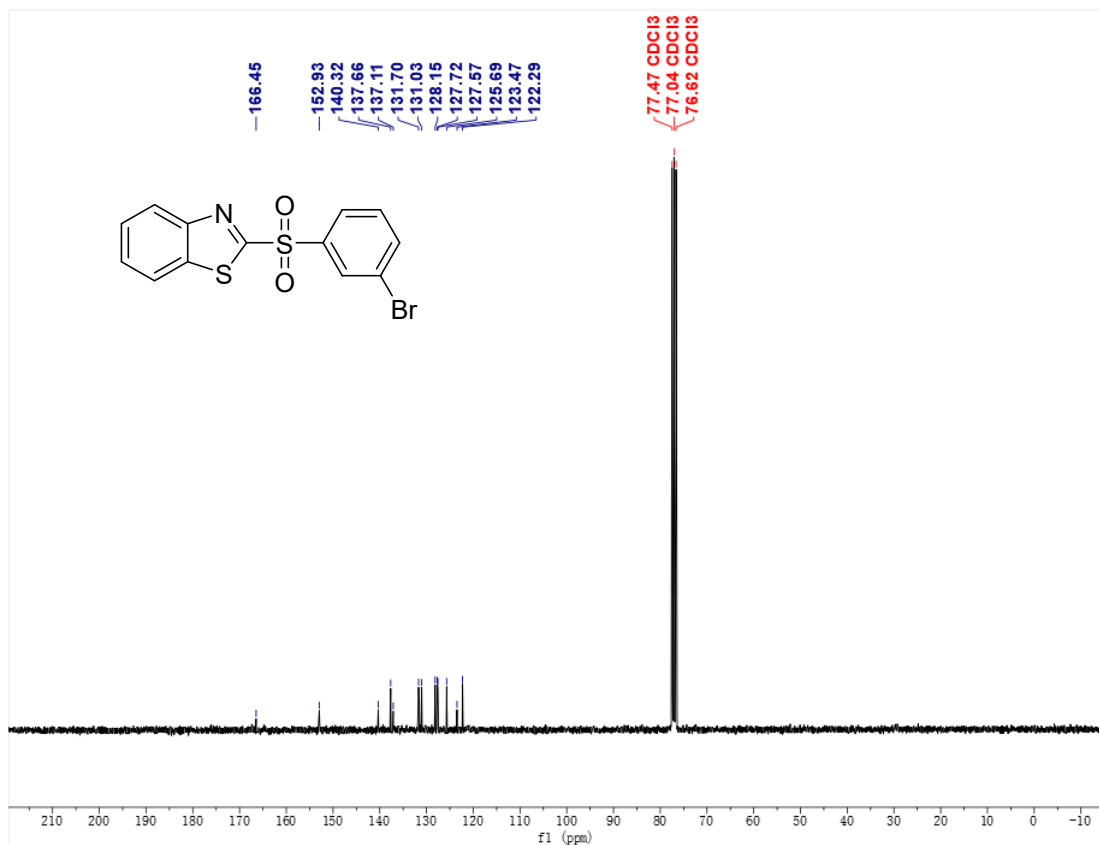

<sup>13</sup>C NMR (75 MHz, CDCl<sub>3</sub>) of **3ak**.

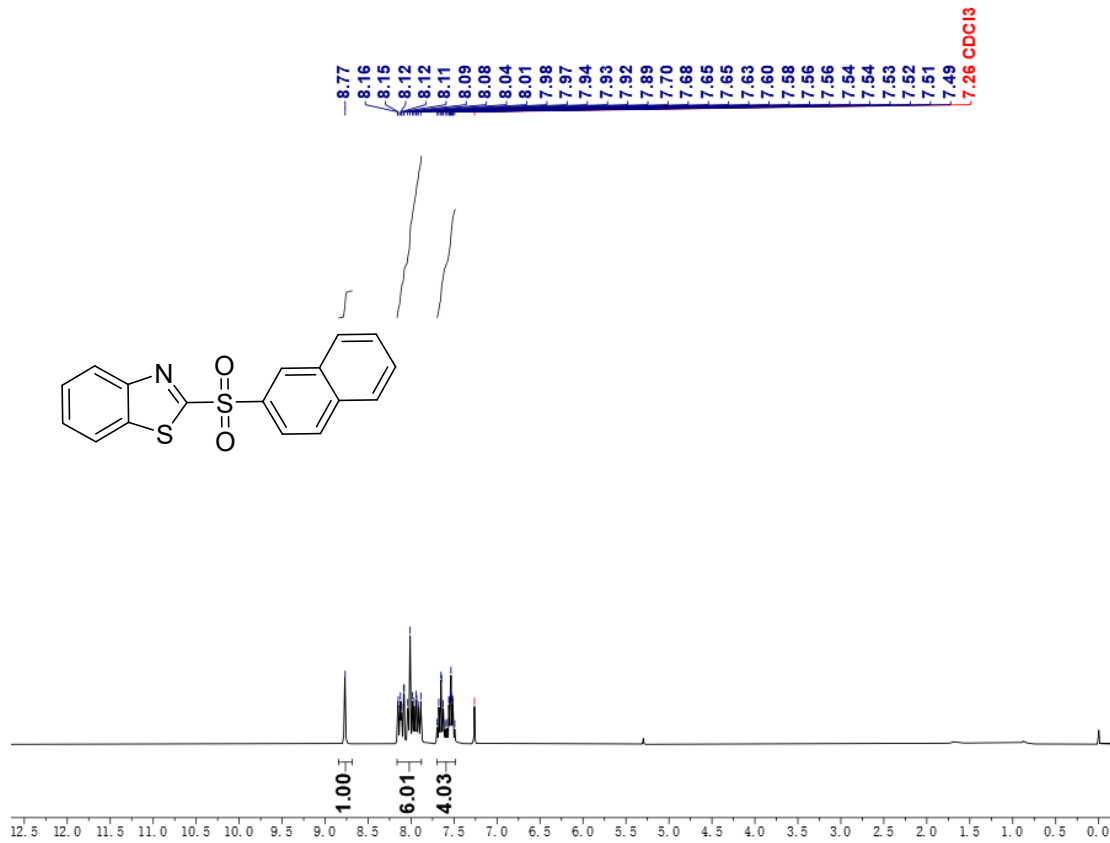

<sup>1</sup>H NMR (300 MHz, CDCl<sub>3</sub>) of **3al**.

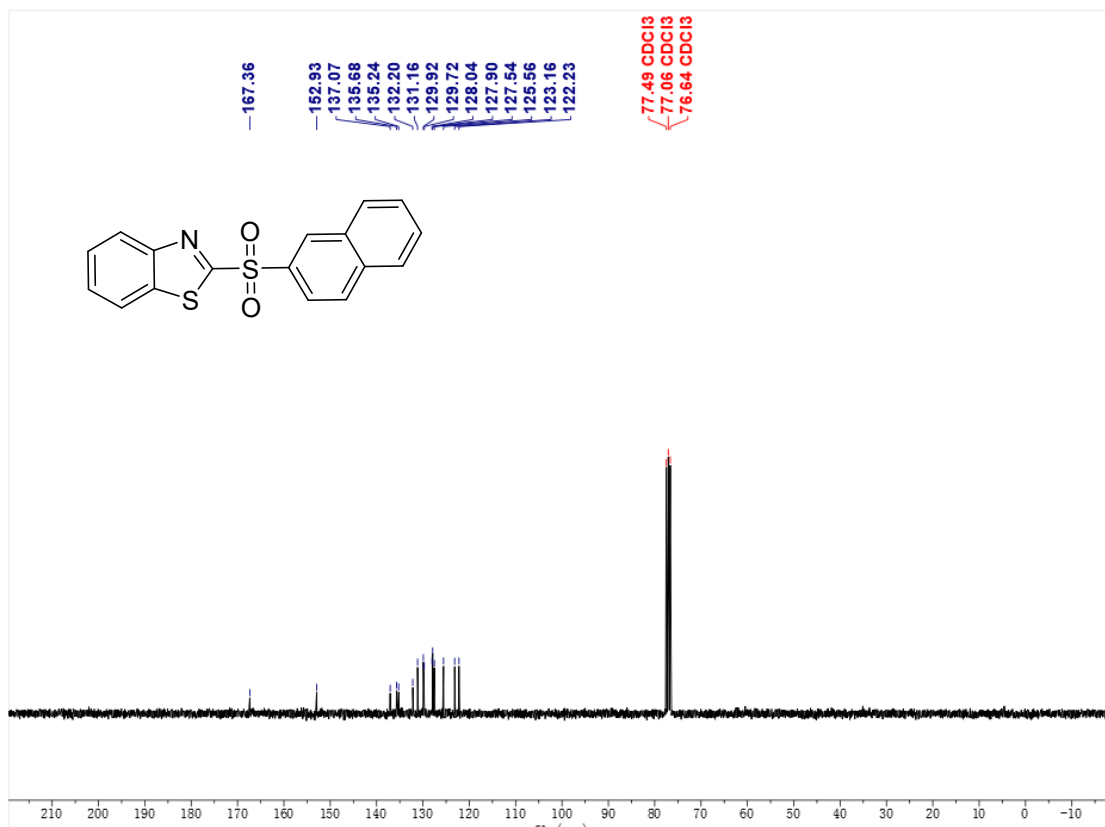

<sup>13</sup>C NMR (75 MHz, CDCl<sub>3</sub>) of 3al.

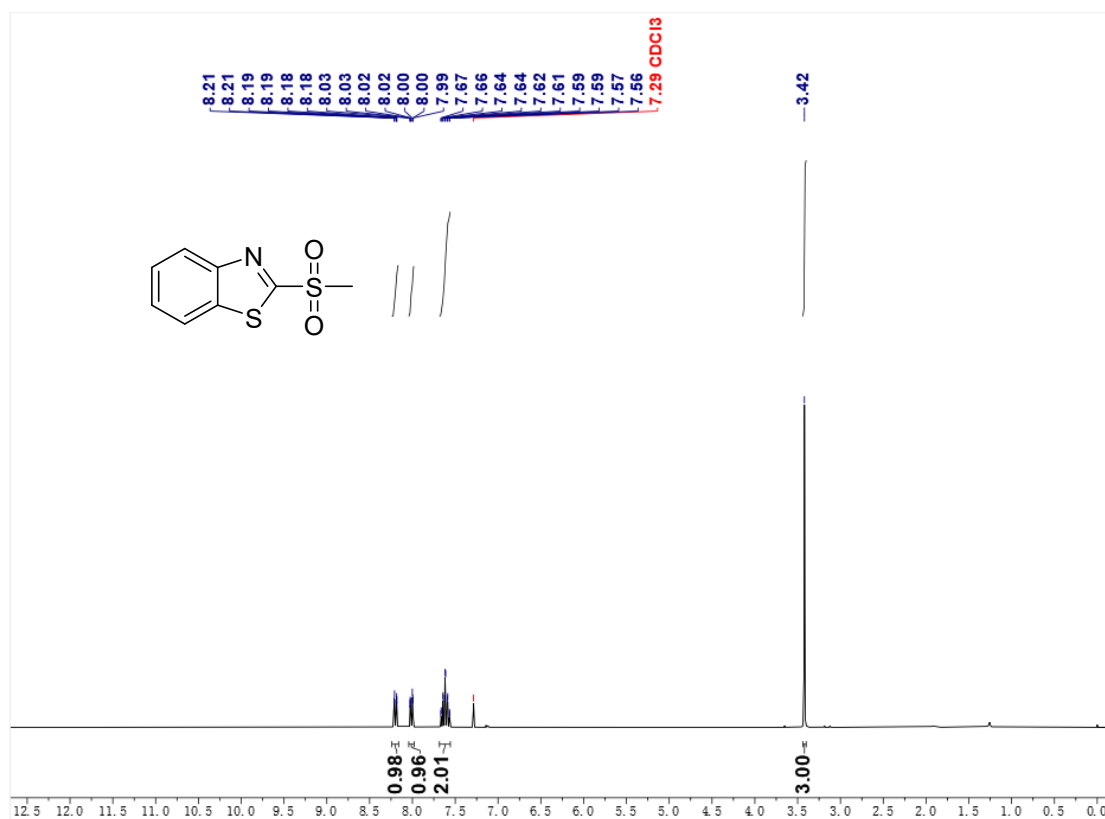

<sup>1</sup>H NMR (300 MHz, CDCl<sub>3</sub>) of 3am.

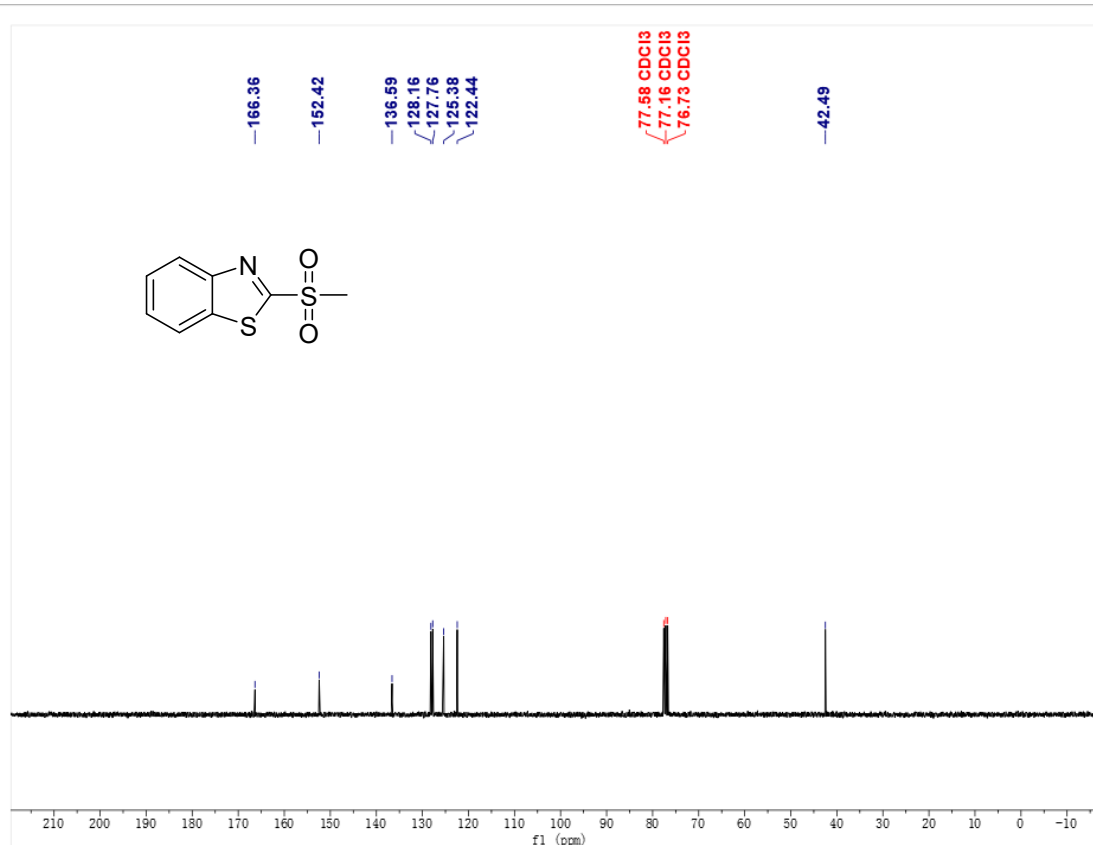

$^{13}\text{C}$  NMR (75 MHz,  $\text{CDCl}_3$ ) of **3am**.

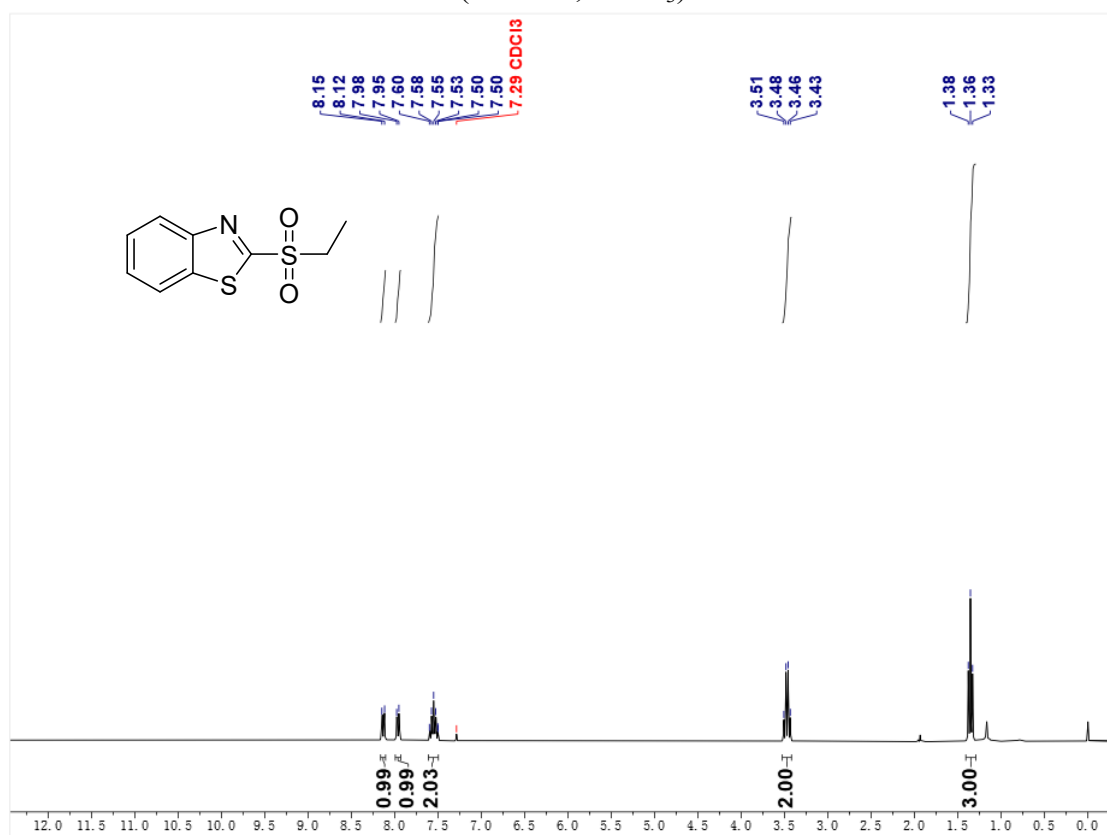

$^1\text{H}$  NMR (300 MHz,  $\text{CDCl}_3$ ) of **3an**.

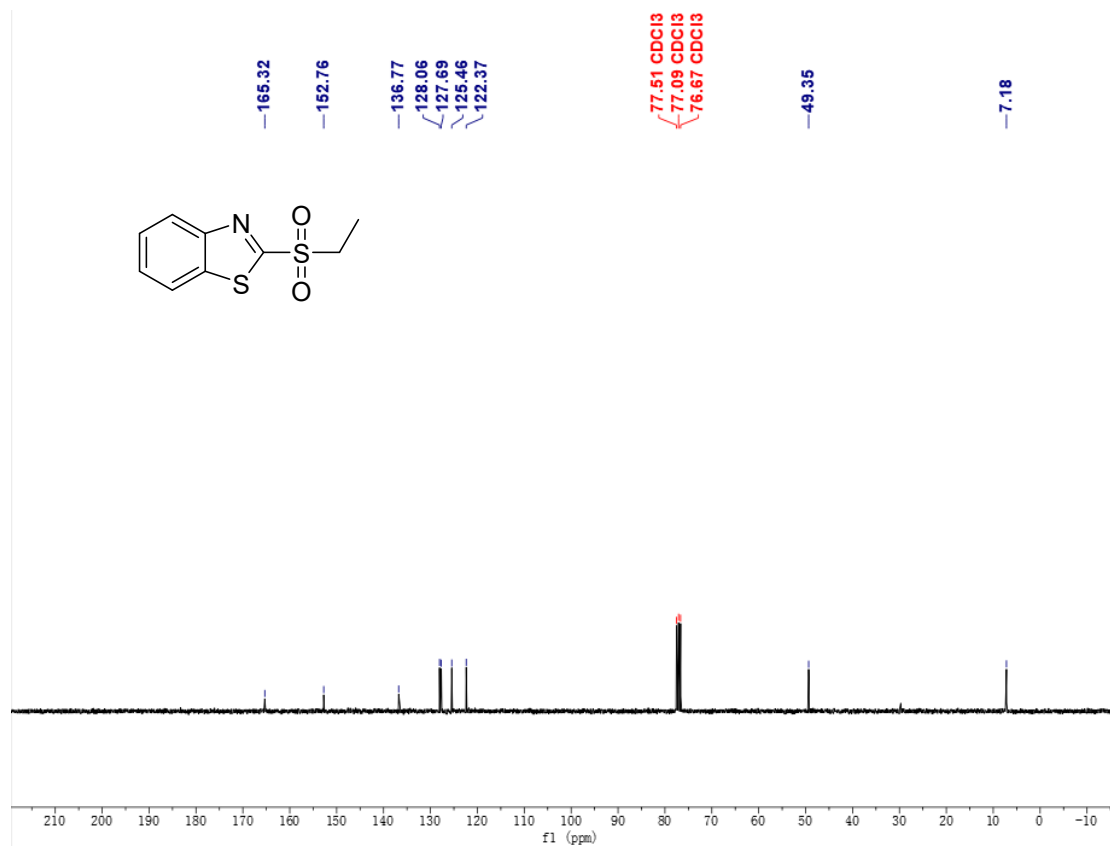

<sup>13</sup>C NMR (75 MHz, CDCl<sub>3</sub>) of **3an**.

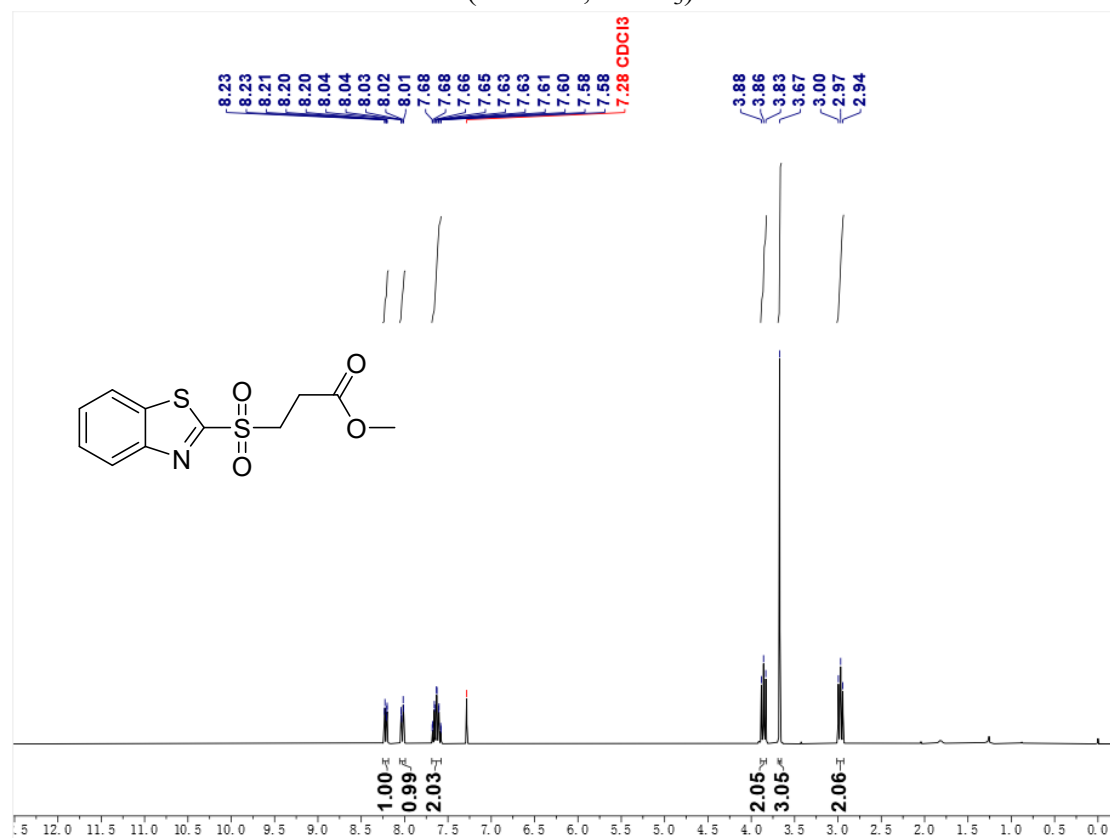

<sup>1</sup>H NMR (300 MHz, CDCl<sub>3</sub>) of **3ao**.

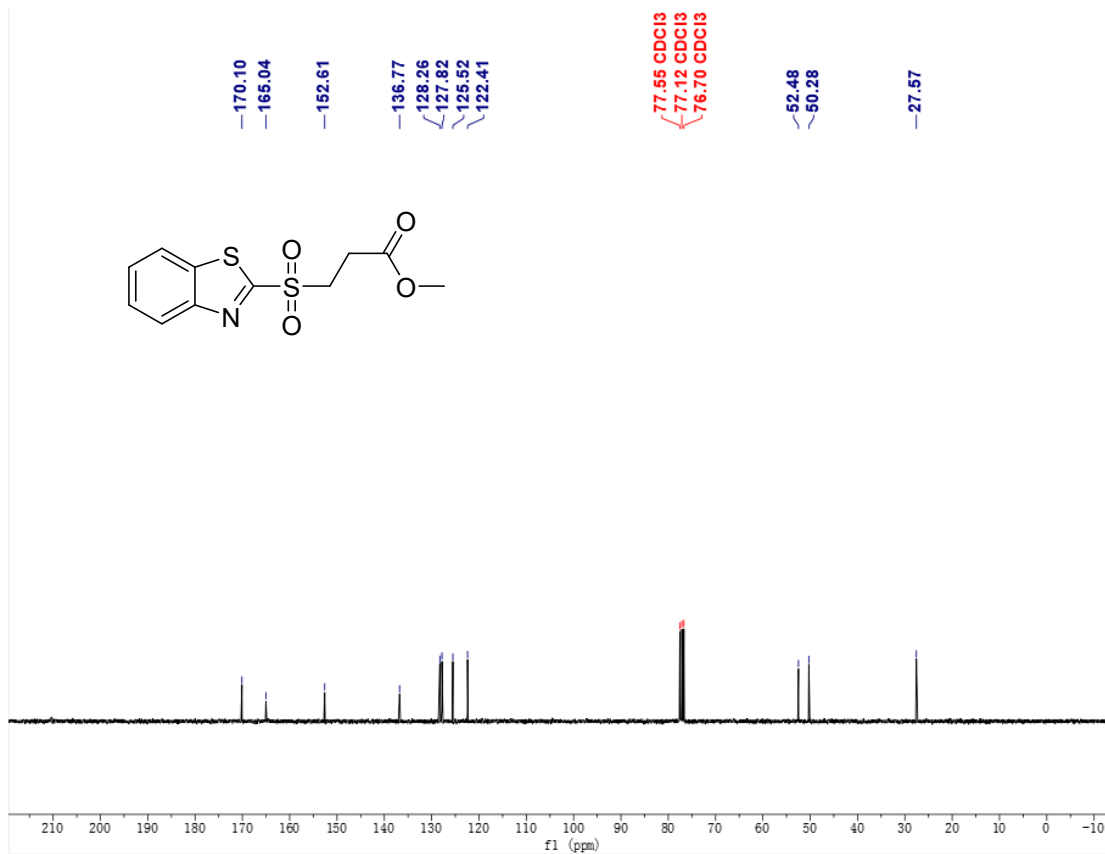

<sup>13</sup>C NMR (75 MHz, CDCl<sub>3</sub>) of 3ao.

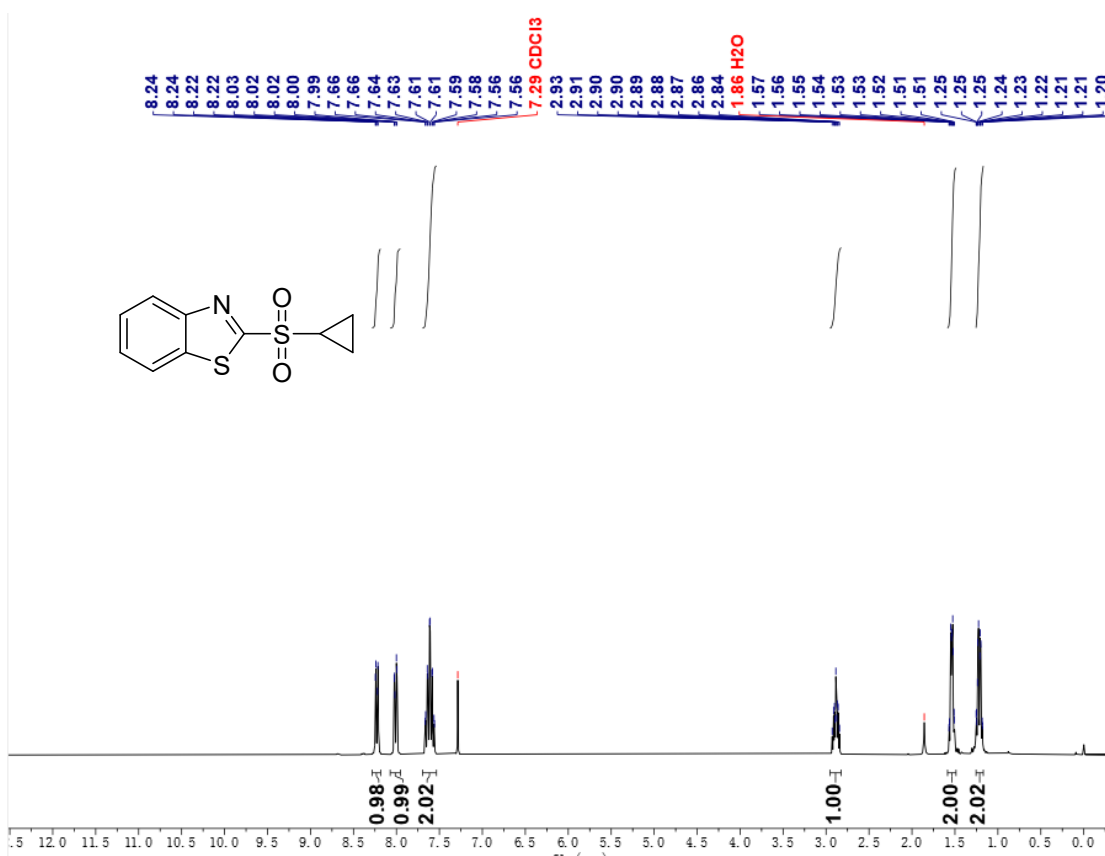

<sup>1</sup>H NMR (300 MHz, CDCl<sub>3</sub>) of 3ap.

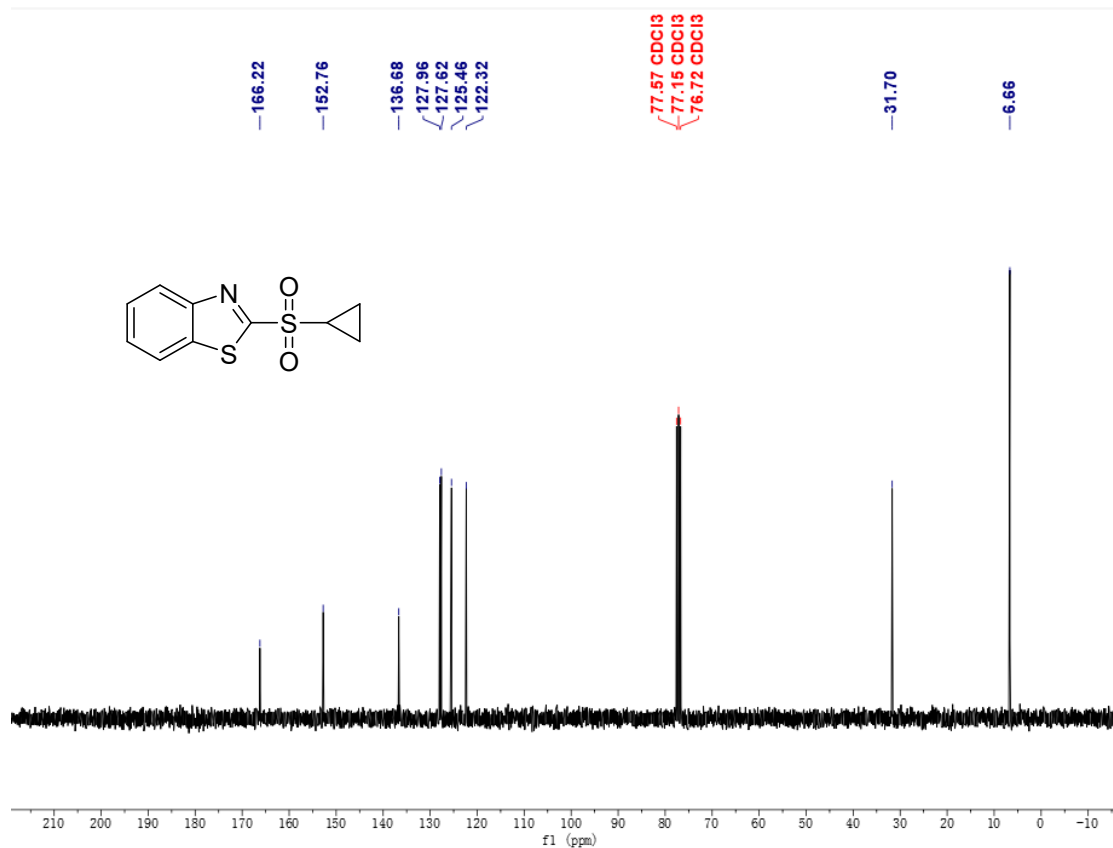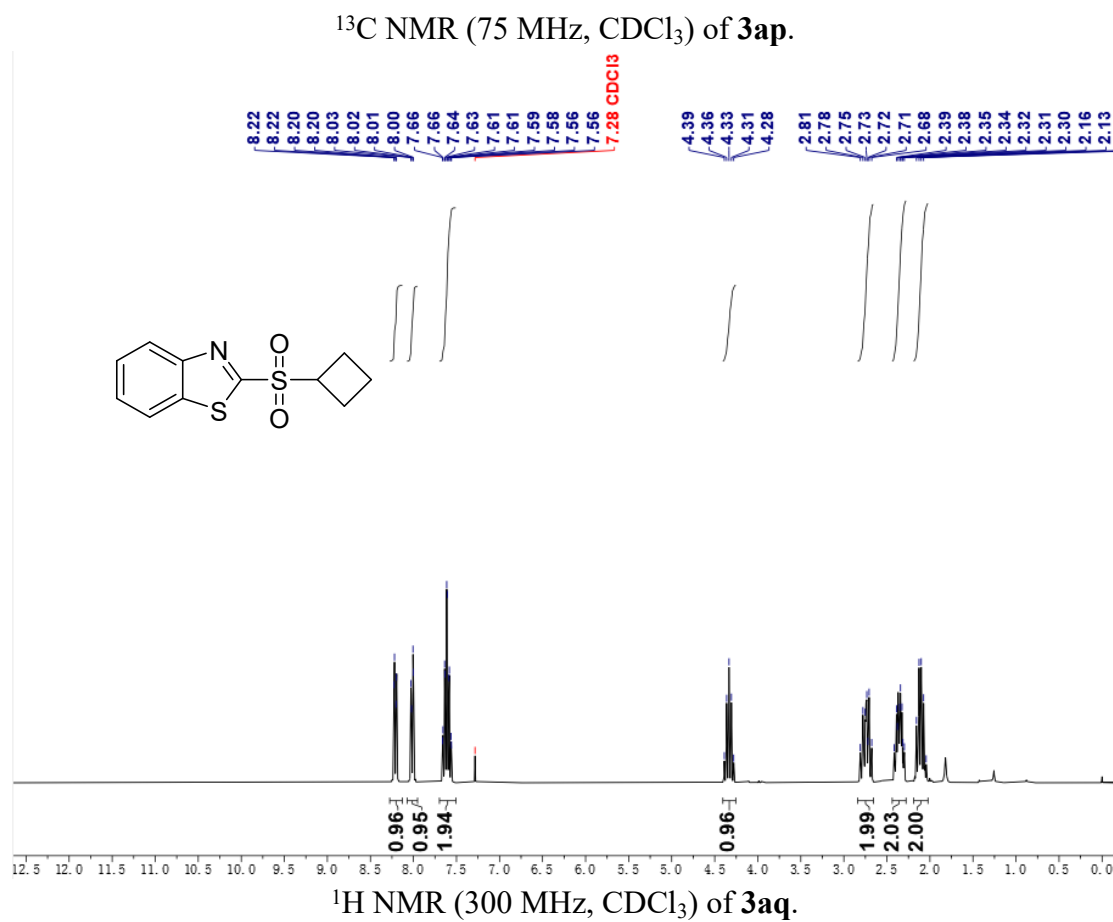

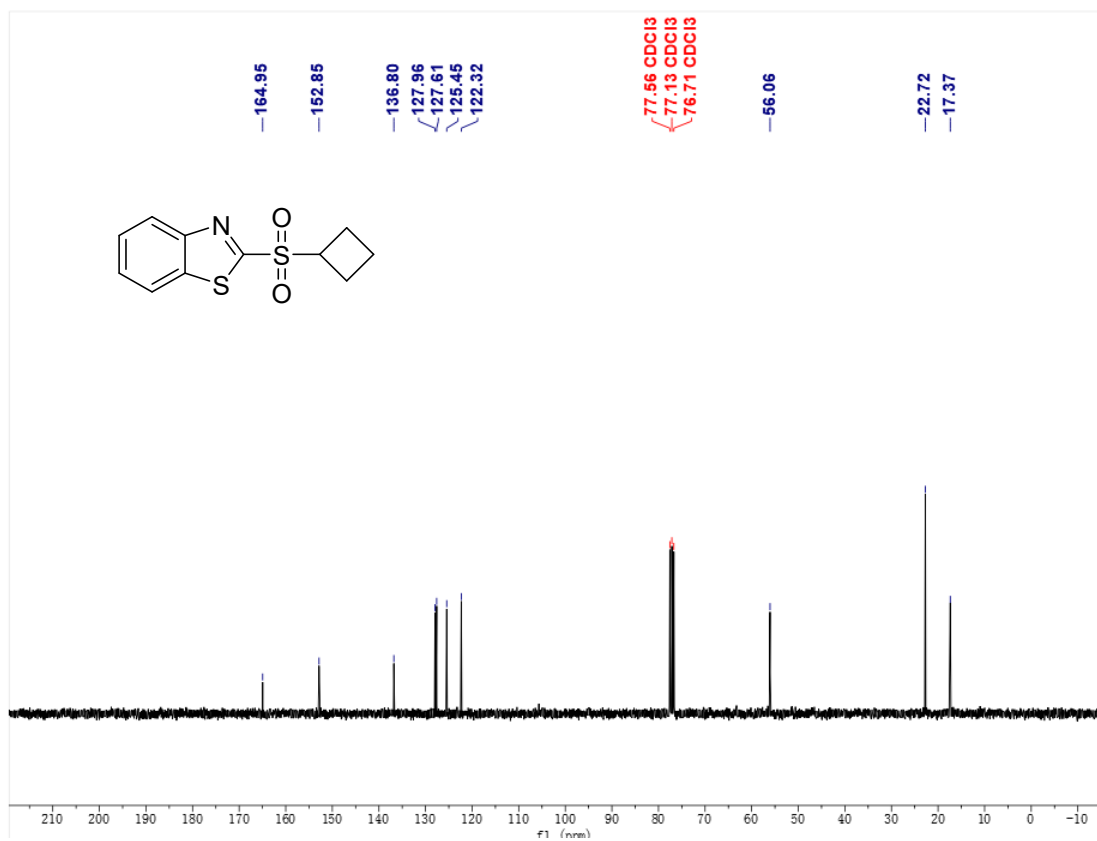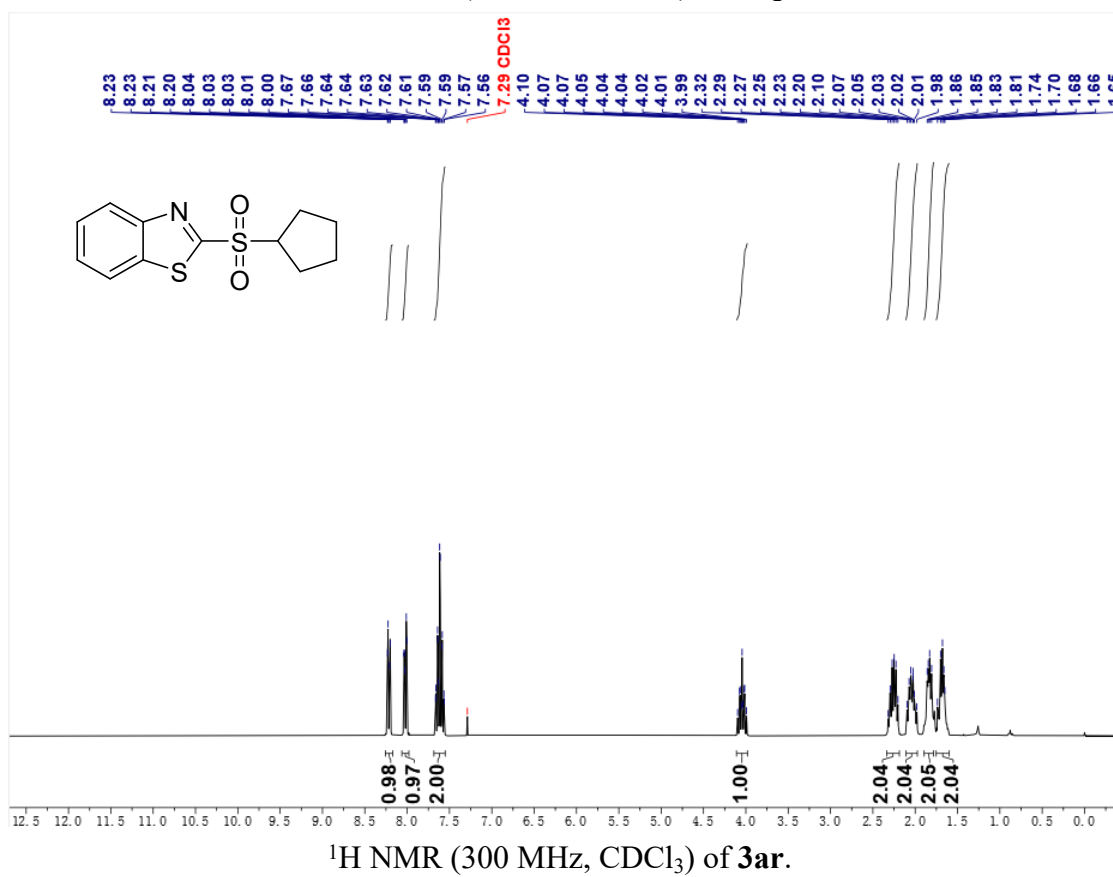

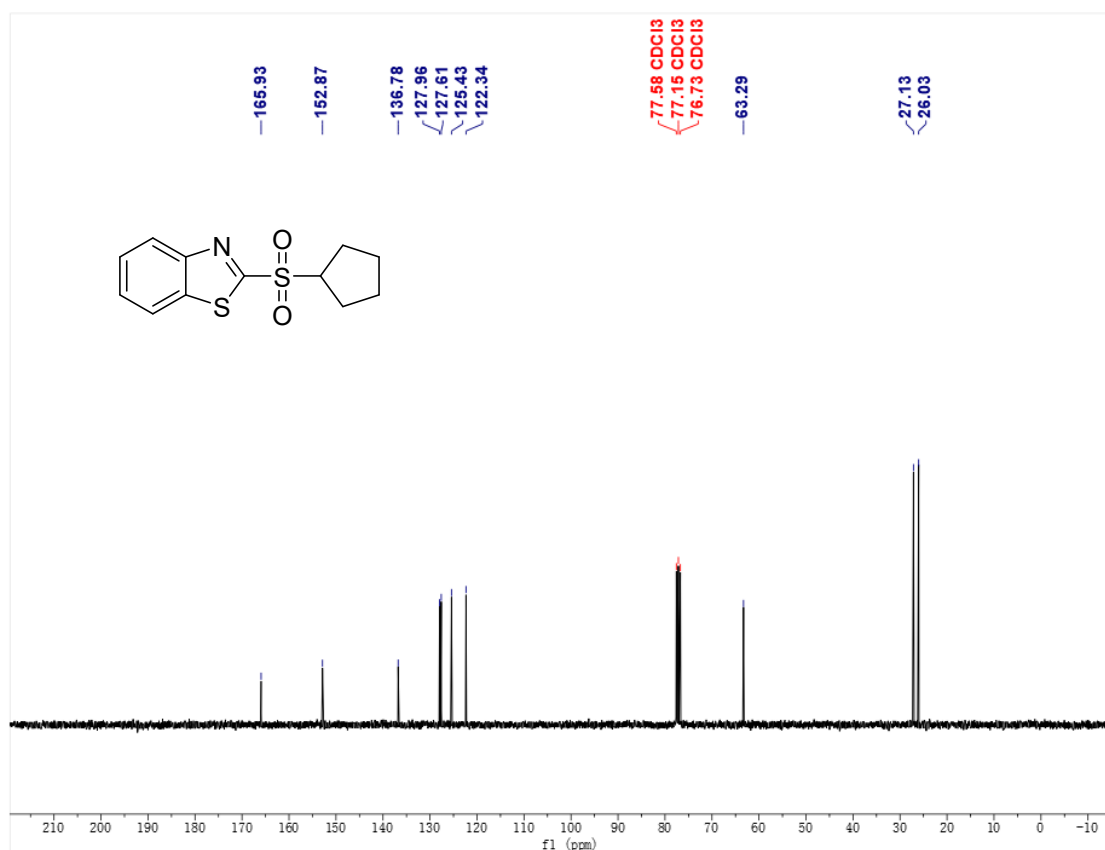

<sup>13</sup>C NMR (75 MHz, CDCl<sub>3</sub>) of **3ar**.

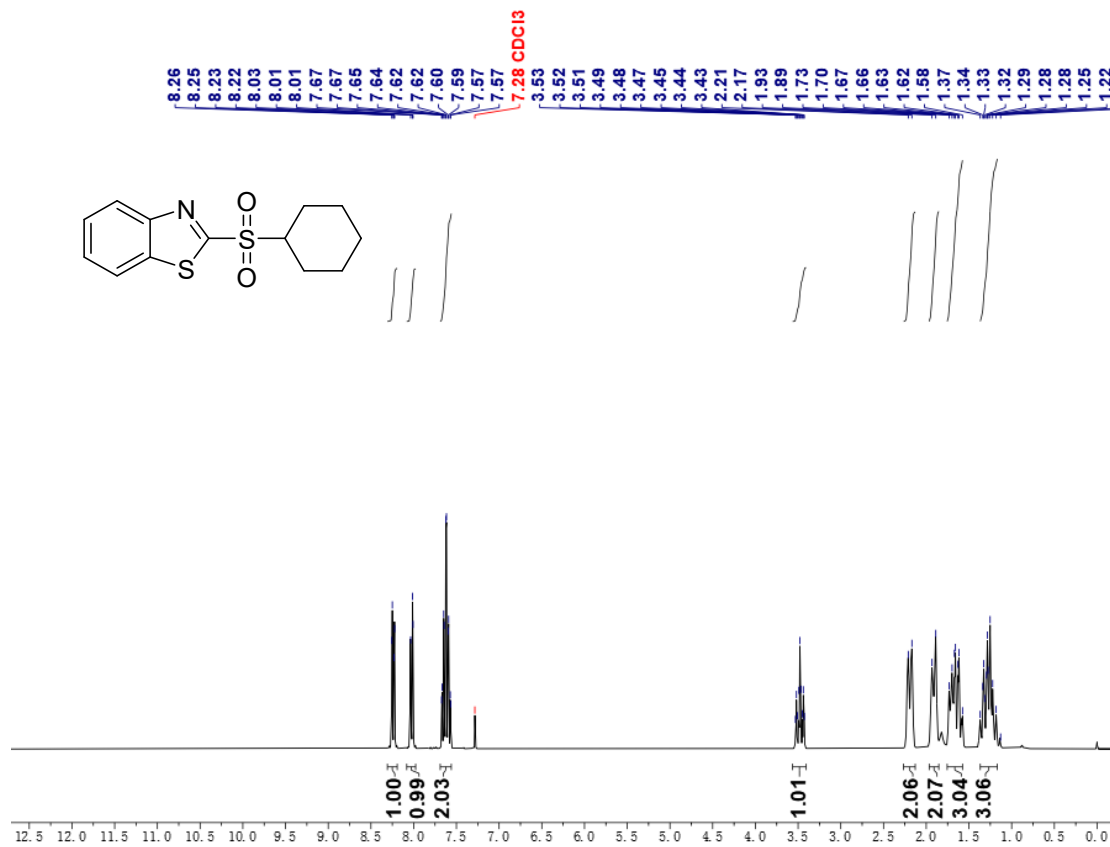

<sup>1</sup>H NMR (300 MHz, CDCl<sub>3</sub>) of **3as**.



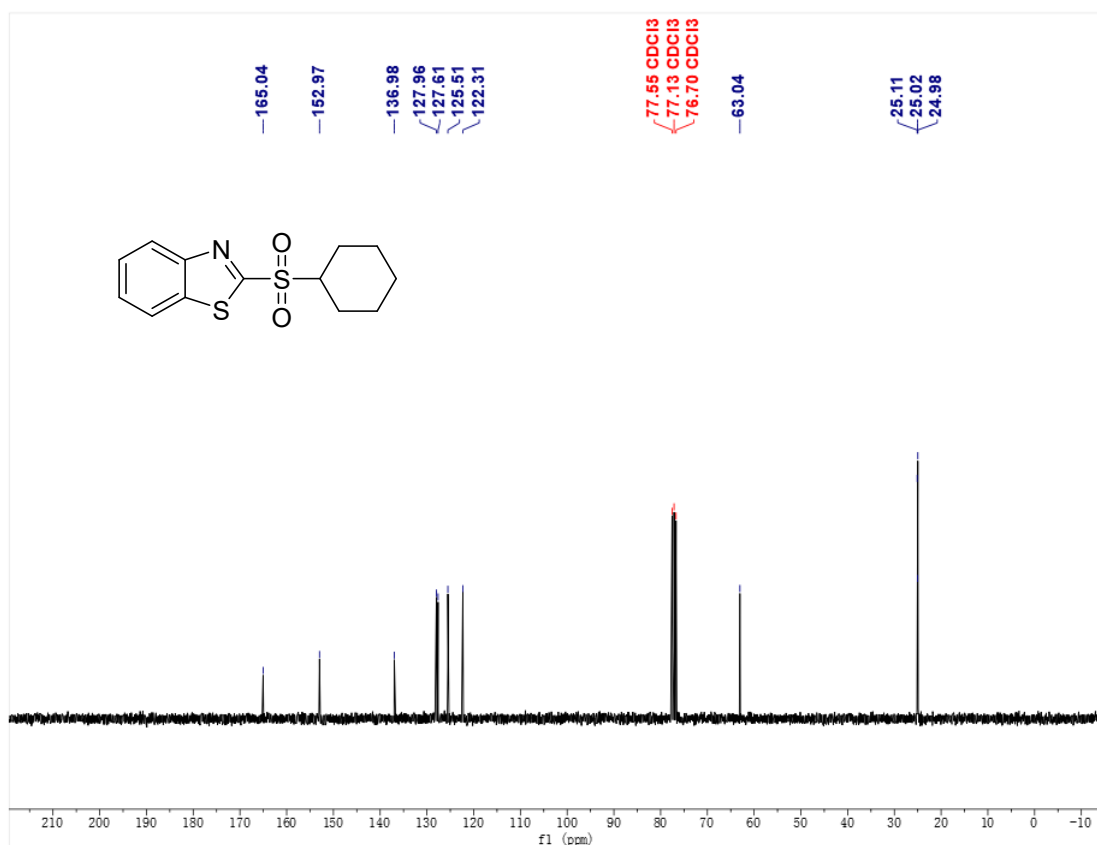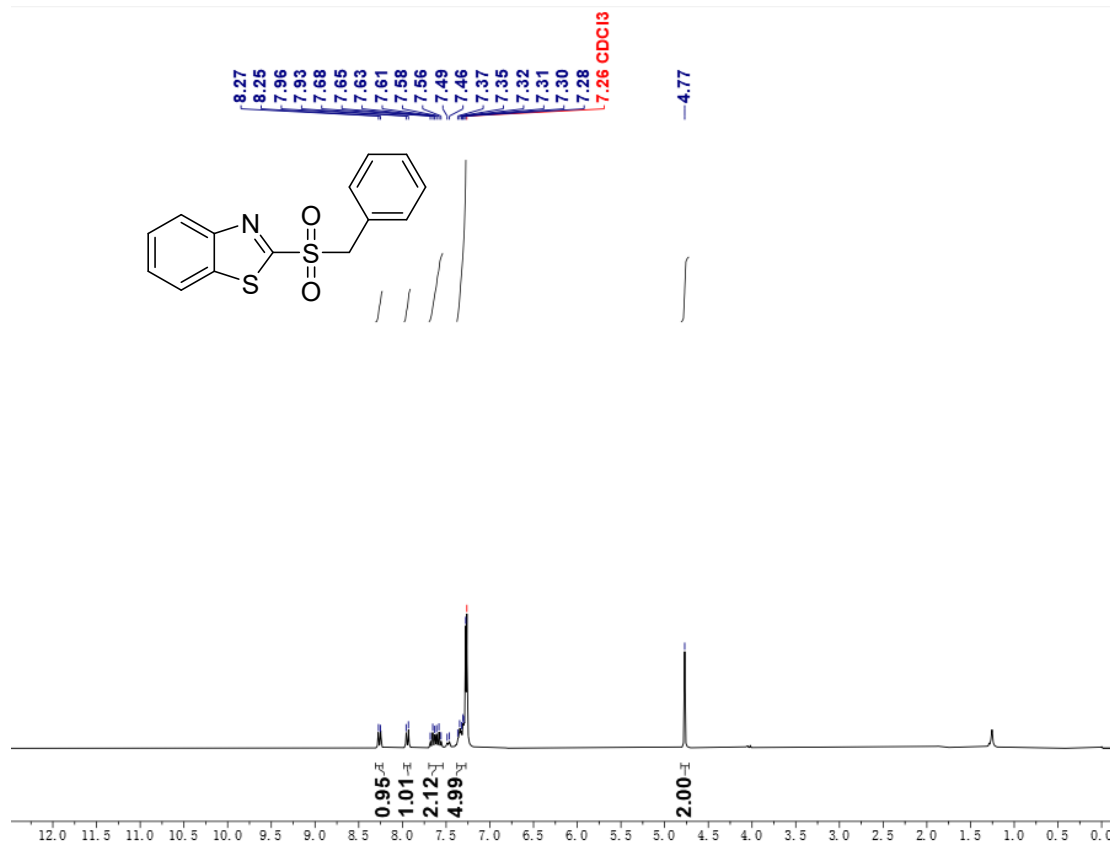

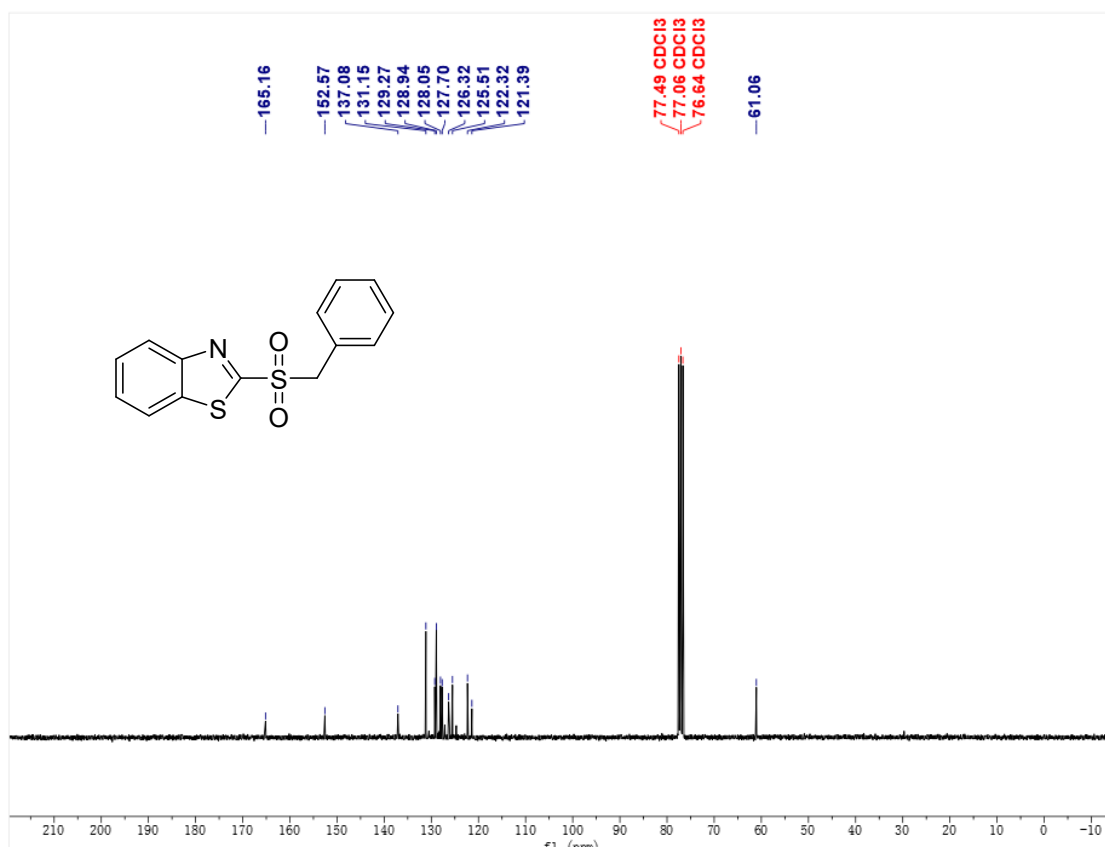

$^{13}\text{C}$  NMR (75 MHz,  $\text{CDCl}_3$ ) of 3at.

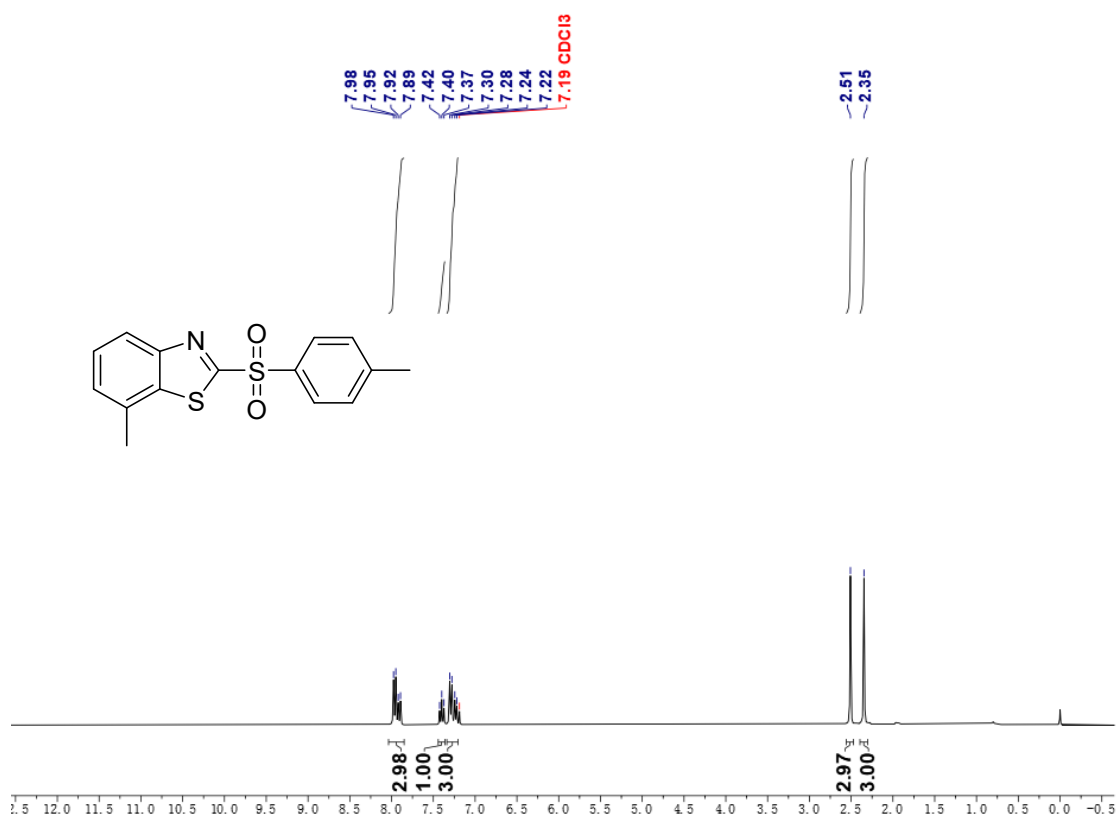

$^1\text{H}$  NMR (300 MHz,  $\text{CDCl}_3$ ) of 3ba.

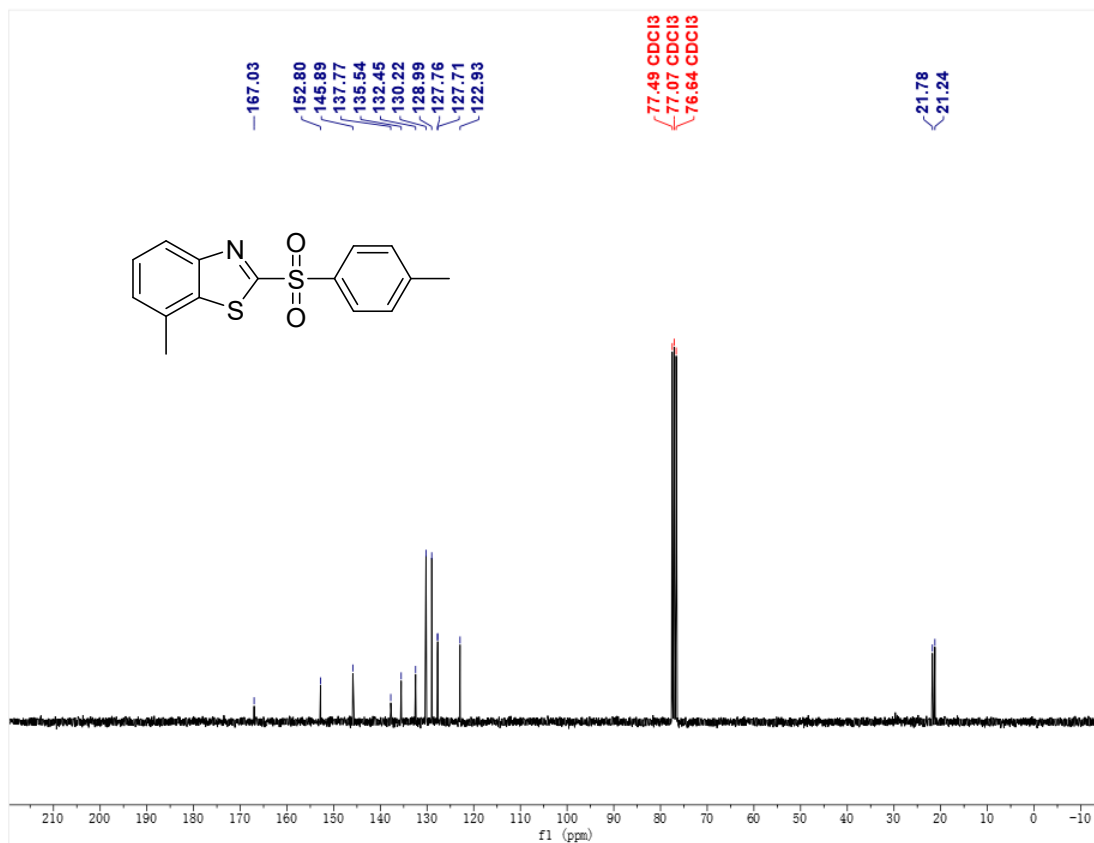

<sup>13</sup>C NMR (75 MHz, CDCl<sub>3</sub>) of 3ba.

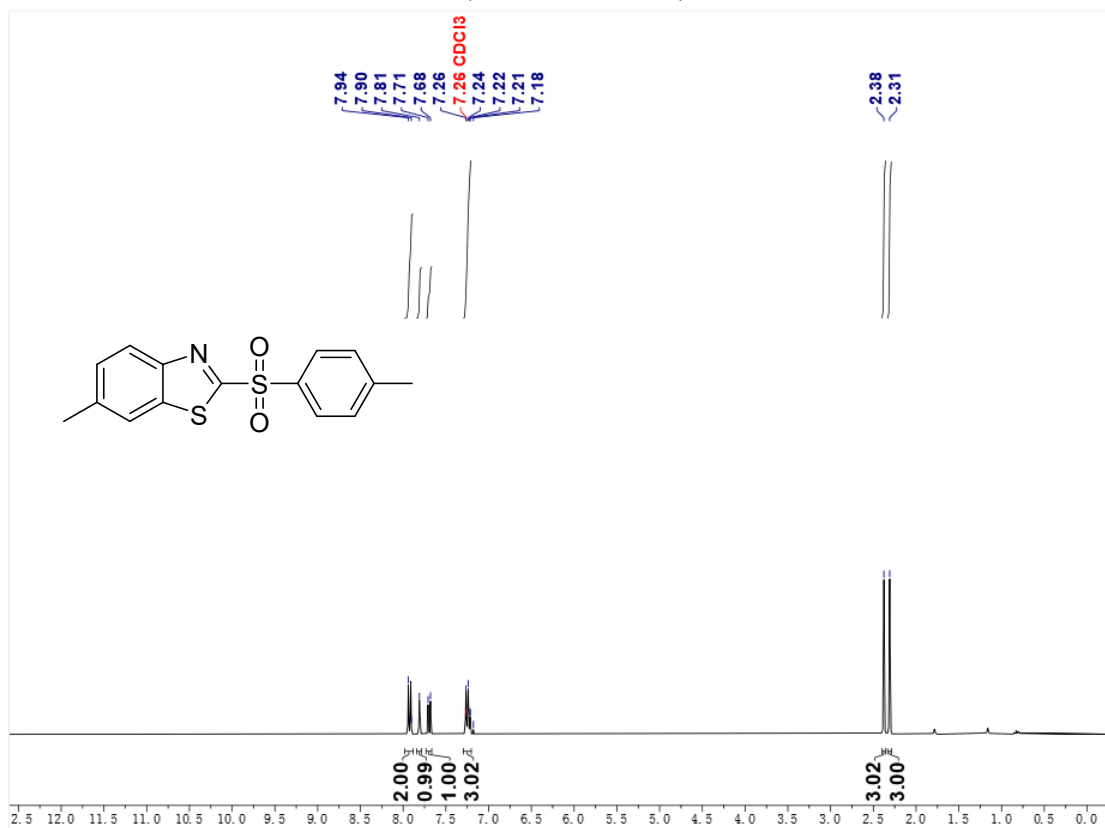

<sup>1</sup>H NMR (300 MHz, CDCl<sub>3</sub>) of 3bb.

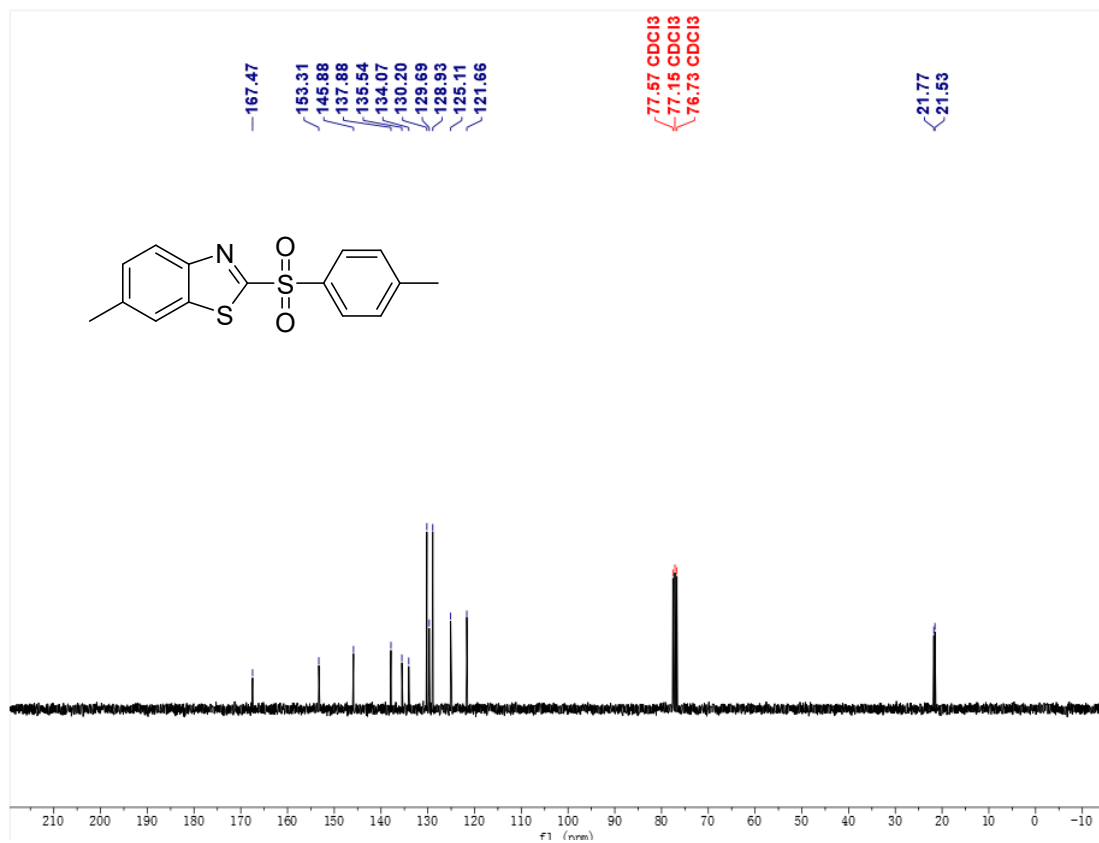

<sup>13</sup>C NMR (75 MHz, CDCl<sub>3</sub>) of 3bb.

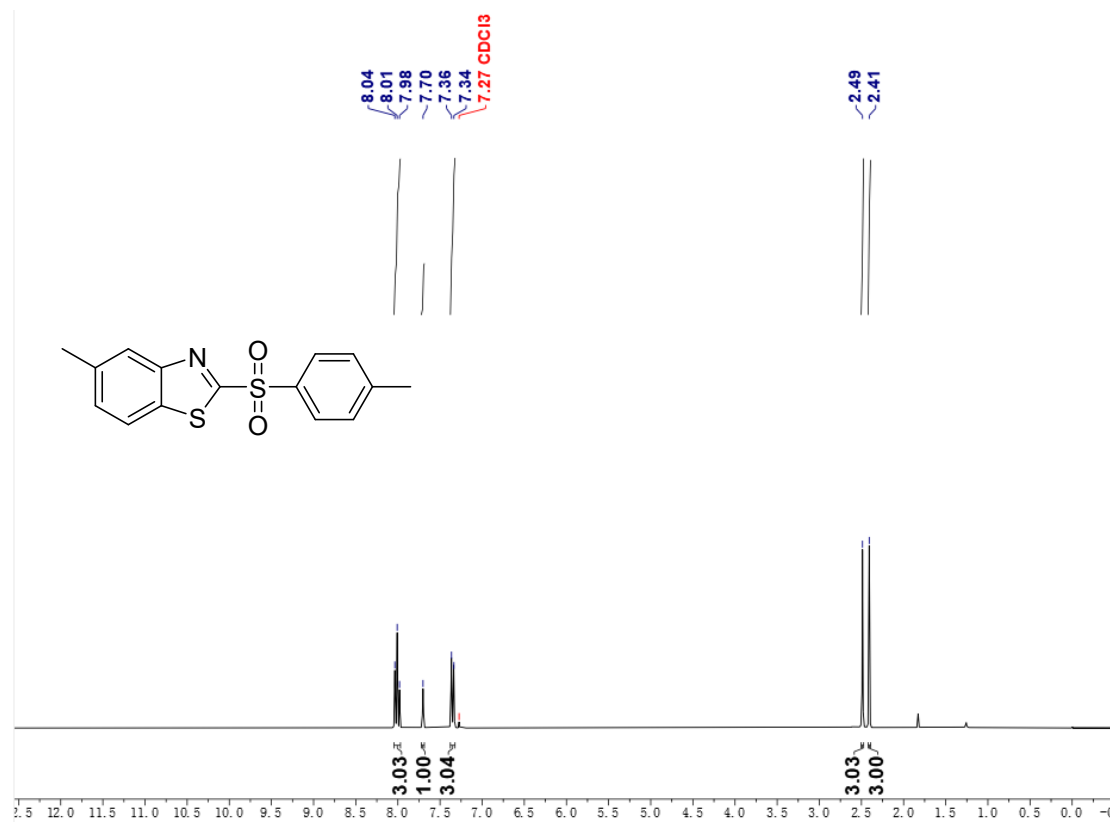

<sup>1</sup>H NMR (300 MHz, CDCl<sub>3</sub>) of 3bc.

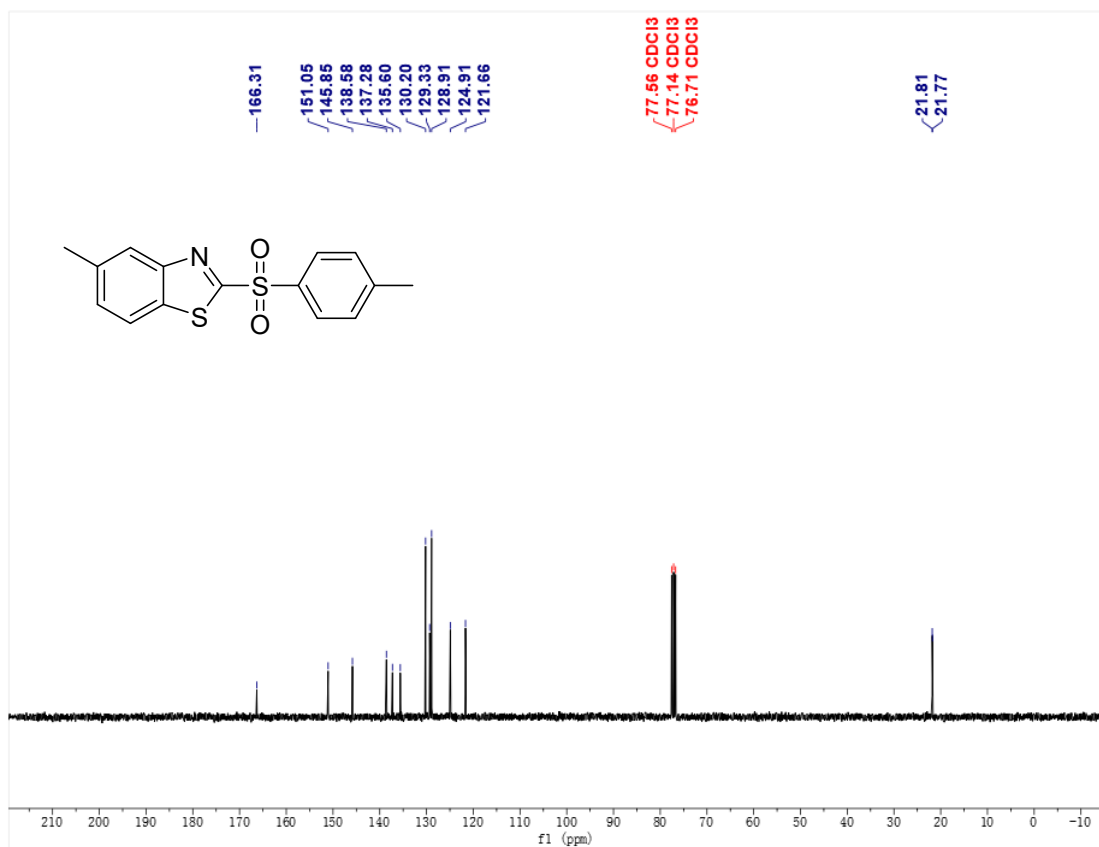

<sup>13</sup>C NMR (75 MHz, CDCl<sub>3</sub>) of 3bc.

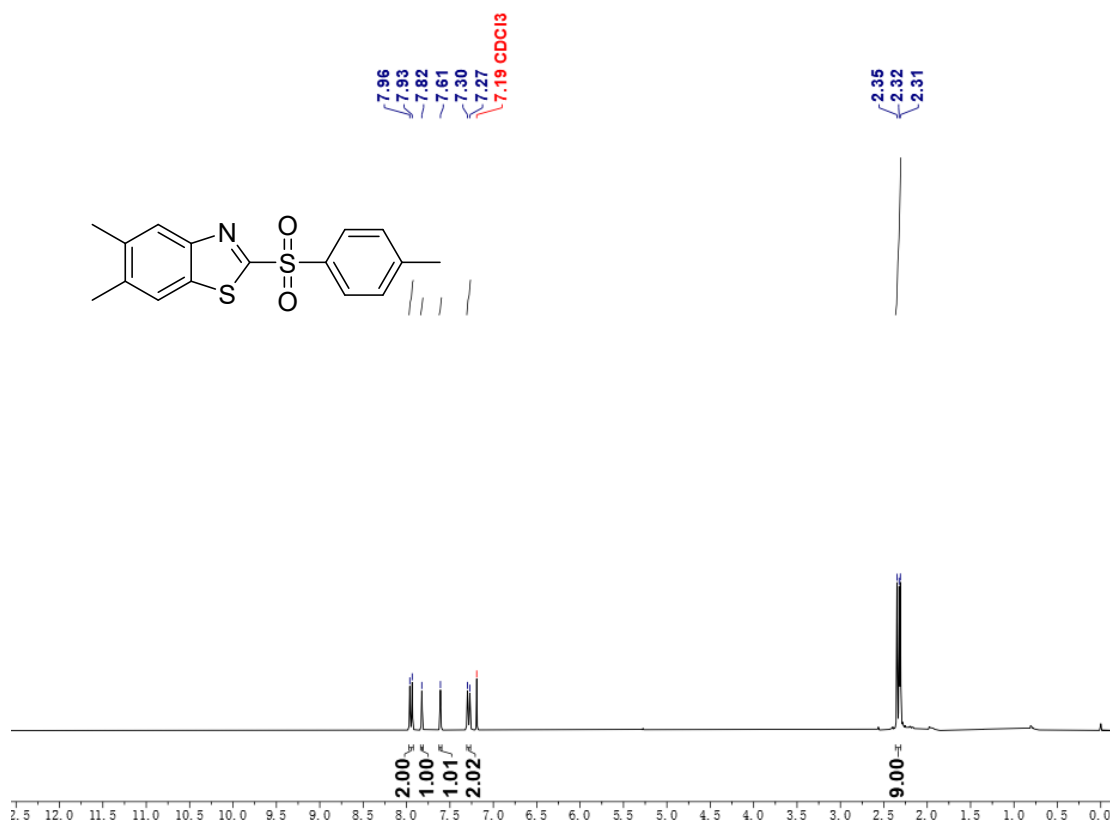

<sup>1</sup>H NMR (300 MHz, CDCl<sub>3</sub>) of 3bd.

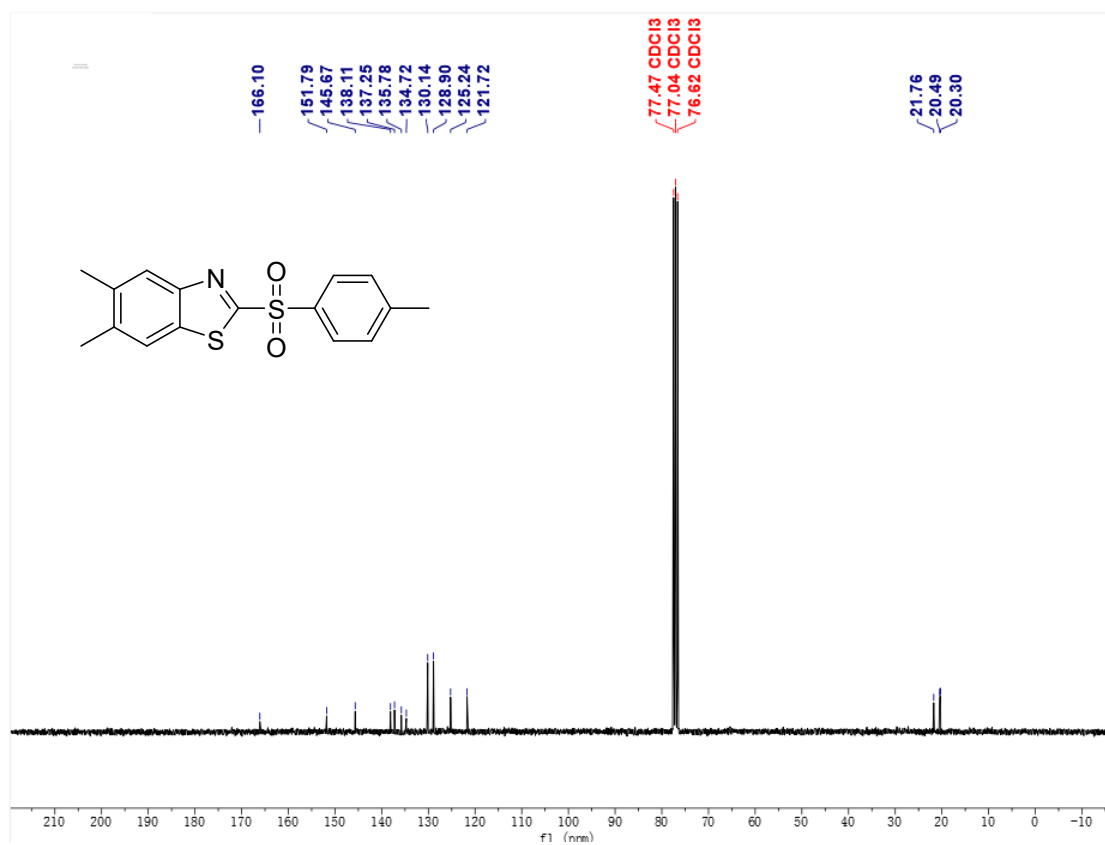

<sup>13</sup>C NMR (75 MHz, CDCl<sub>3</sub>) of 3bd.

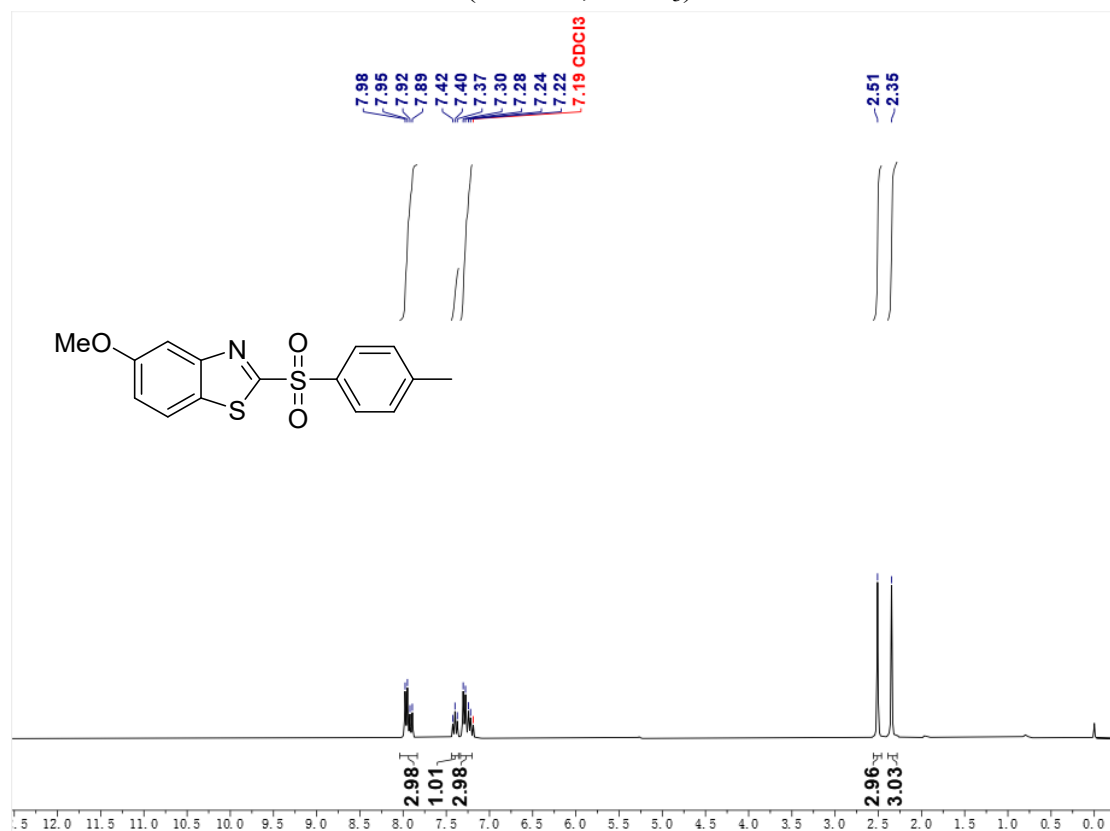

<sup>1</sup>H NMR (300 MHz, CDCl<sub>3</sub>) of 3be.

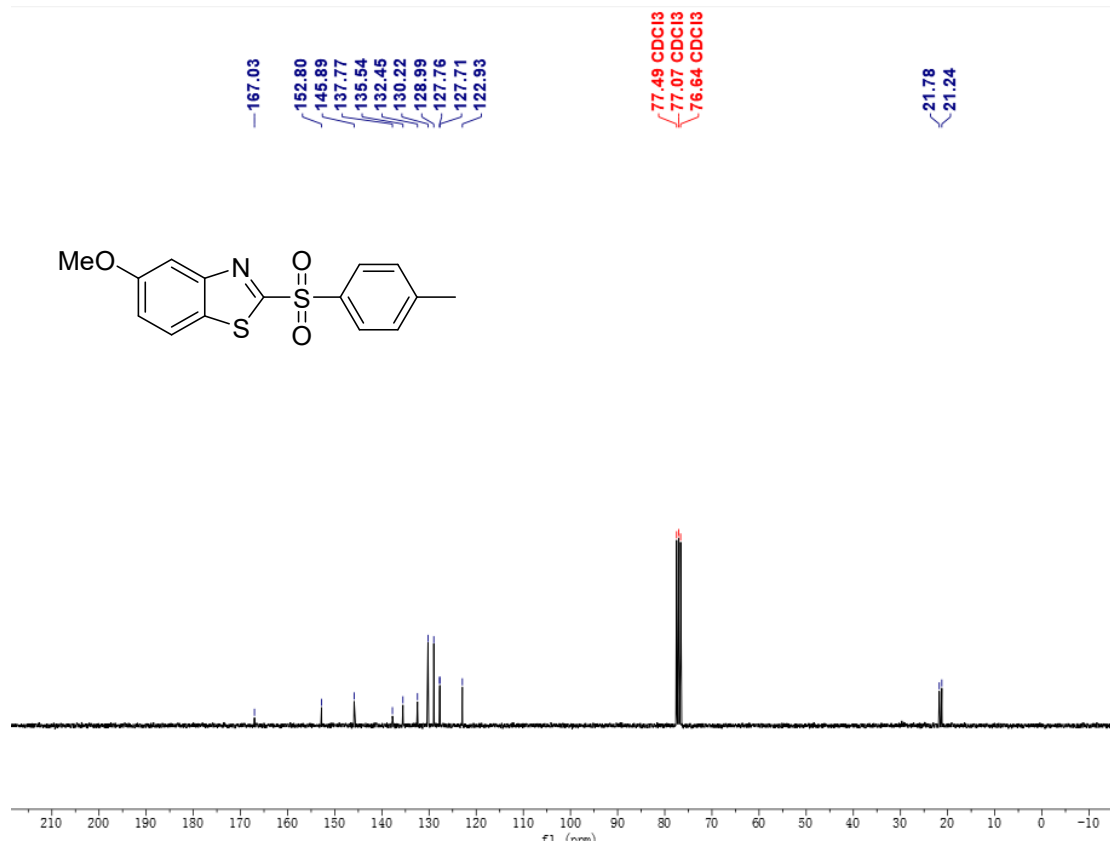

<sup>13</sup>C NMR (75 MHz, CDCl<sub>3</sub>) of 3be.

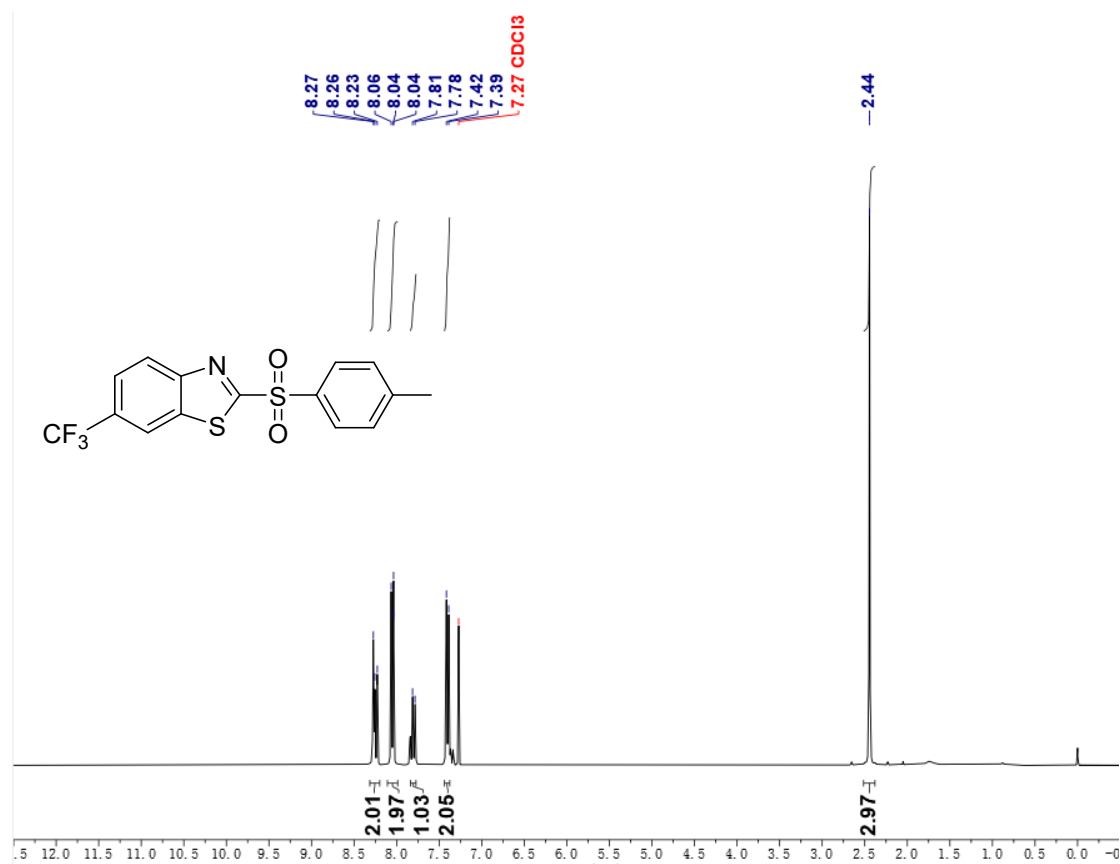

<sup>1</sup>H NMR (300 MHz, CDCl<sub>3</sub>) of 3bf.

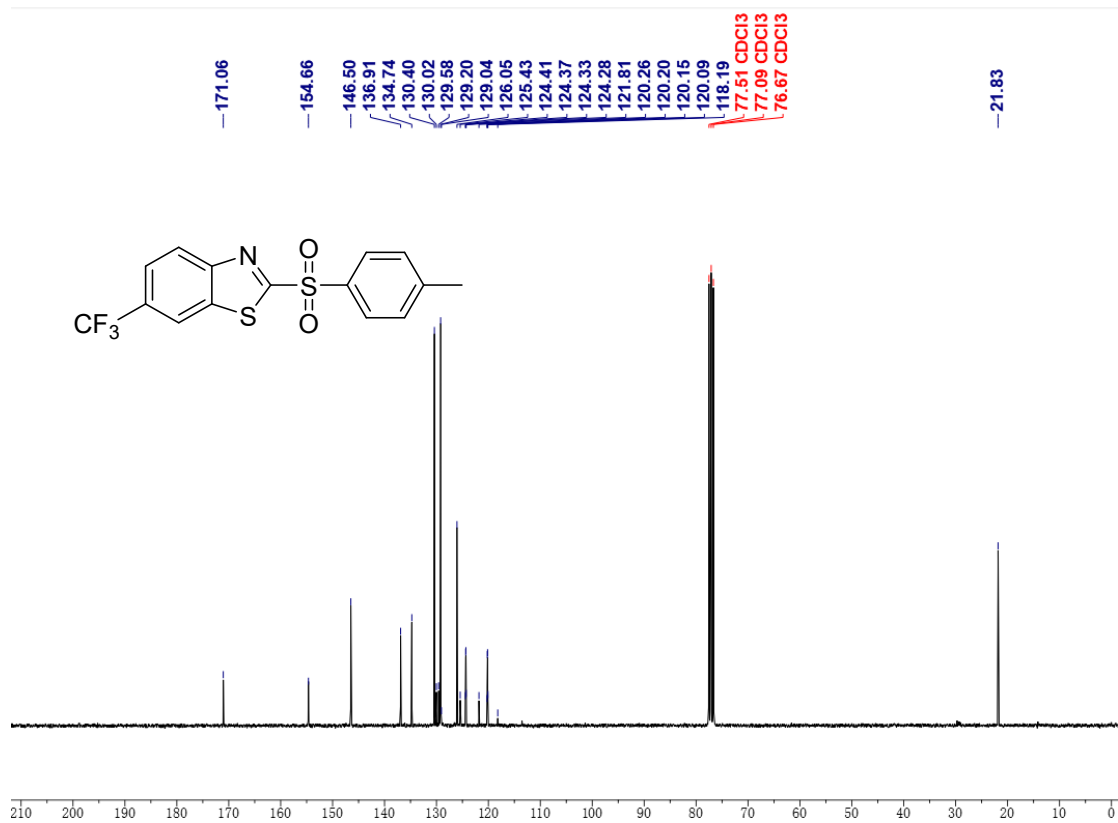

<sup>13</sup>C NMR (75 MHz, CDCl<sub>3</sub>) of **3bf**.

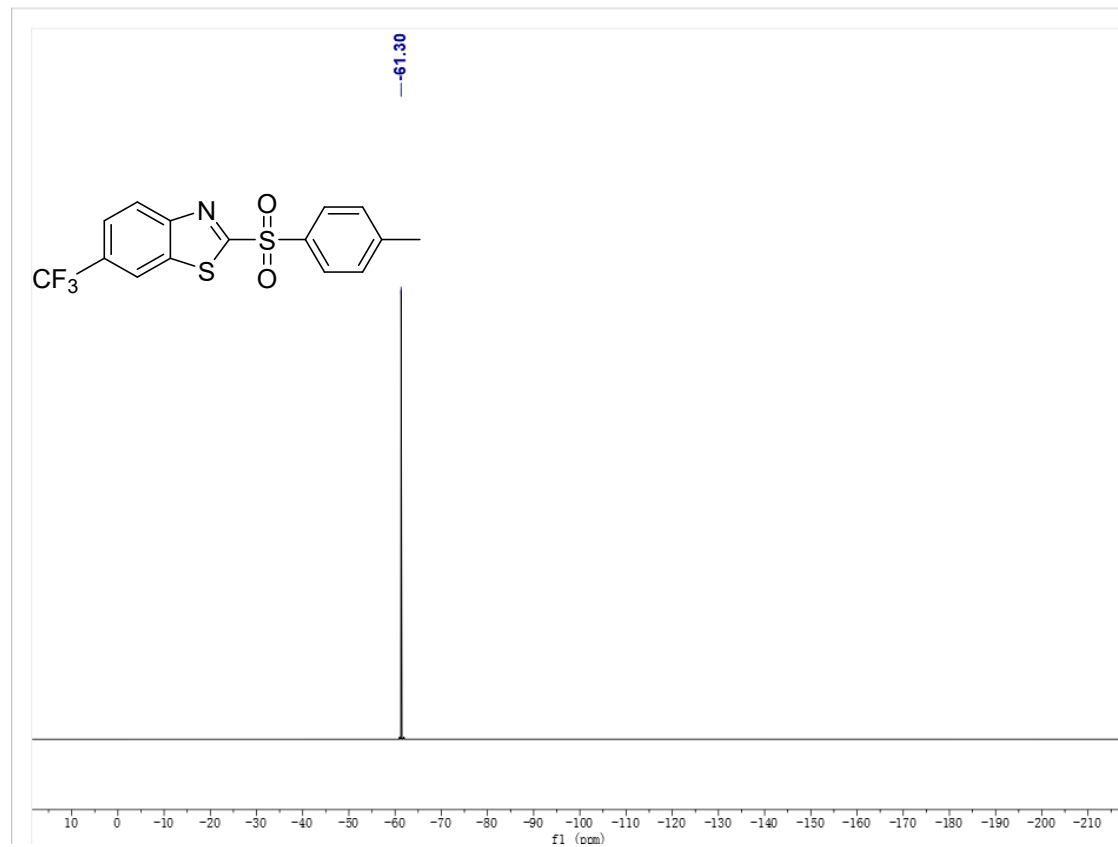

<sup>19</sup>F NMR (282 MHz, CDCl<sub>3</sub>) of **3bf**.



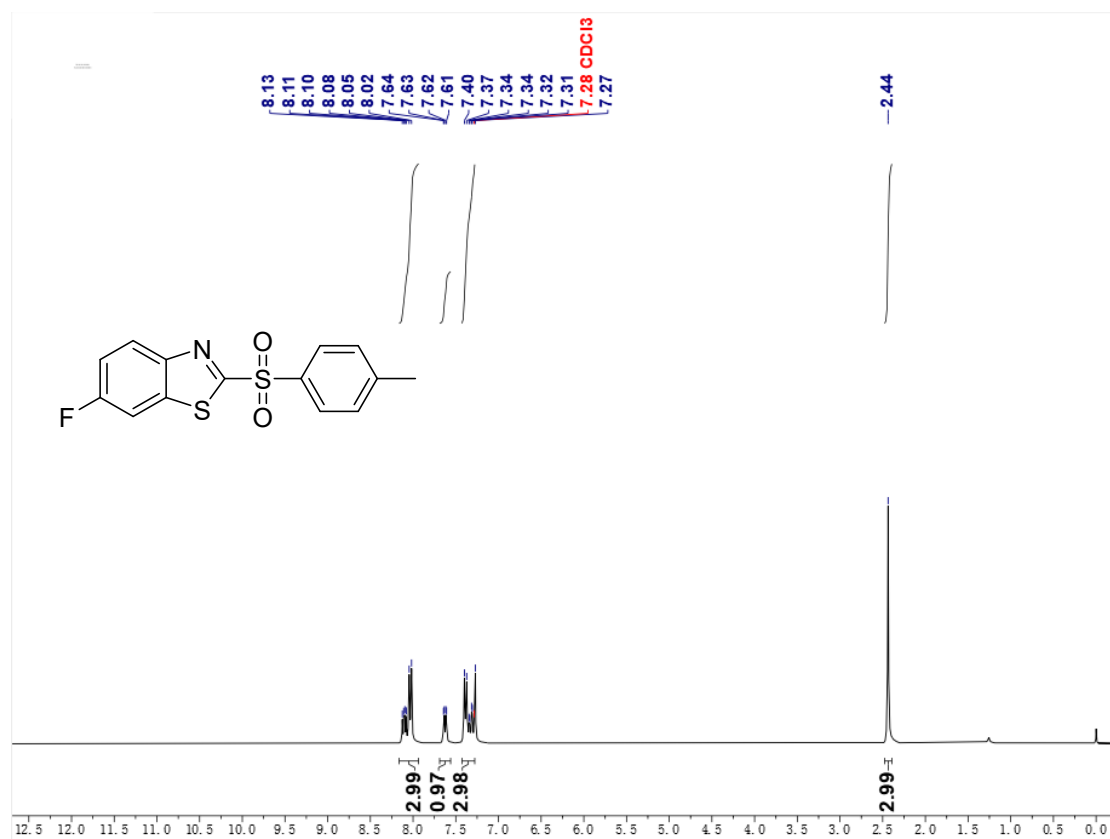

<sup>1</sup>H NMR (300 MHz, CDCl<sub>3</sub>) of **3bg**.

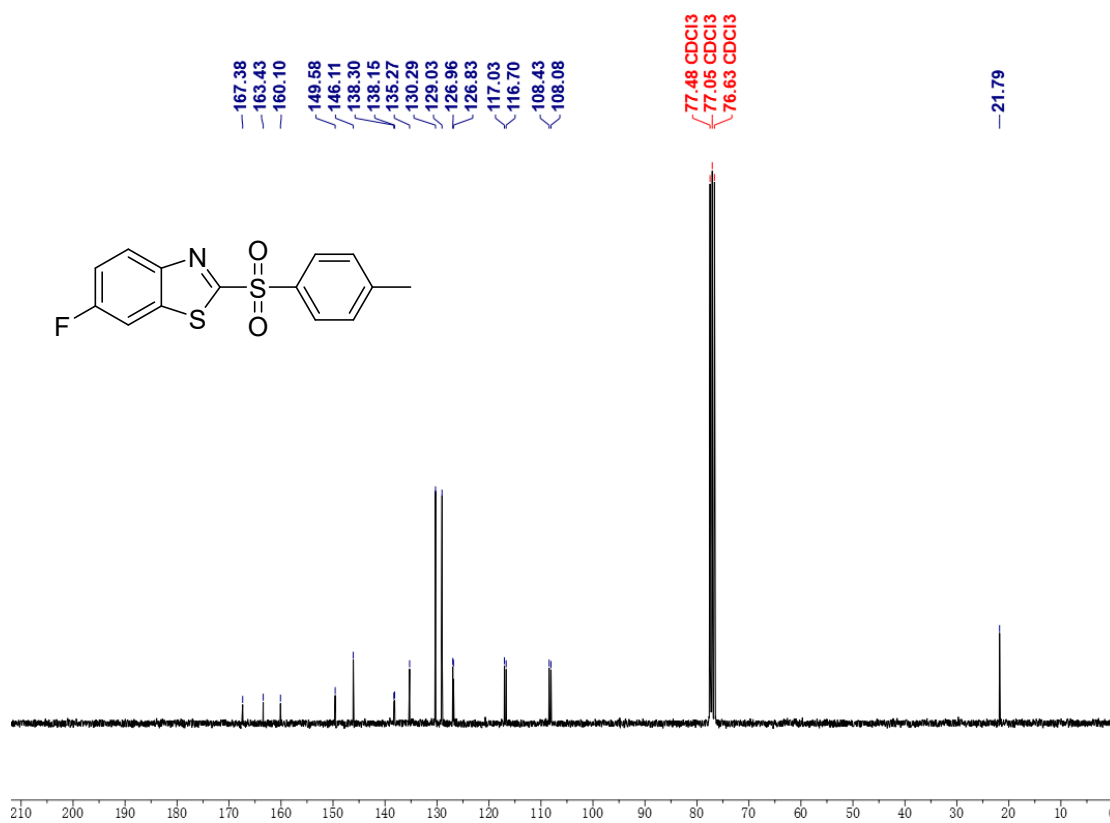

<sup>13</sup>C NMR (75 MHz, CDCl<sub>3</sub>) of **3bg**.

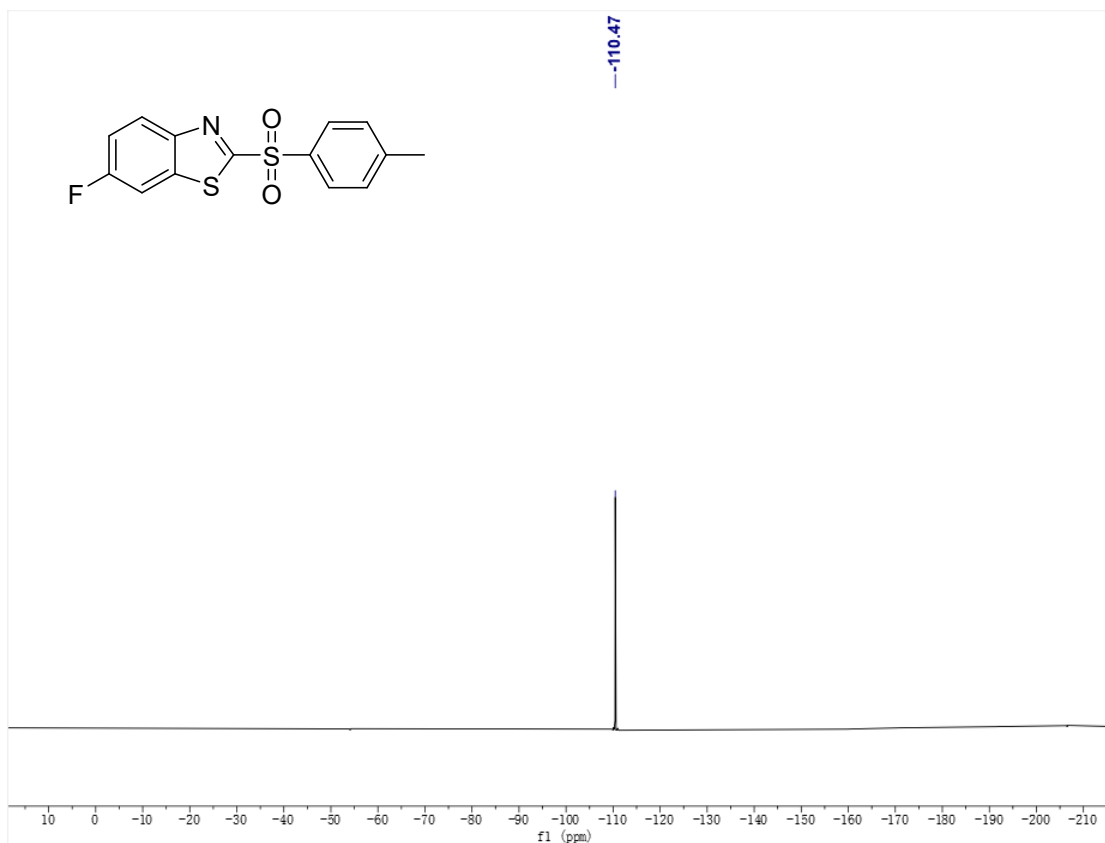

$^{19}\text{F}$  NMR (282 MHz,  $\text{CDCl}_3$ ) of **3bg**.

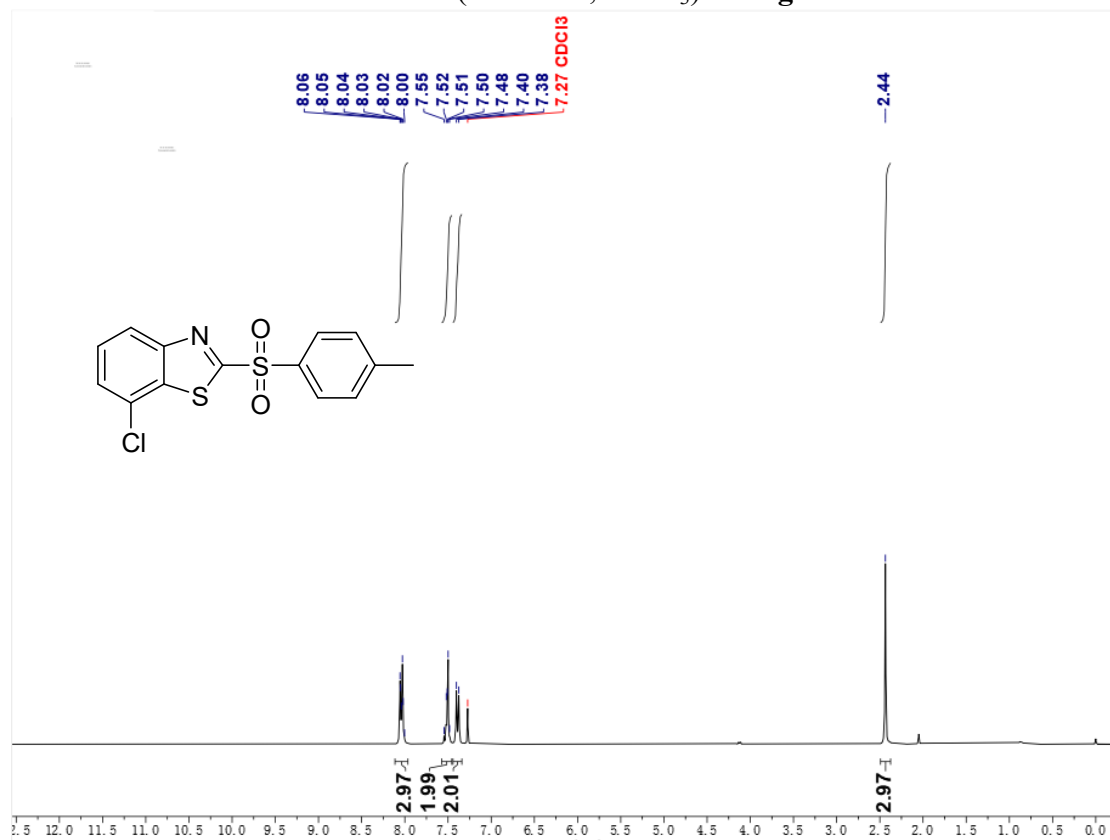

$^1\text{H}$  NMR (300 MHz,  $\text{CDCl}_3$ ) of **3bh**.

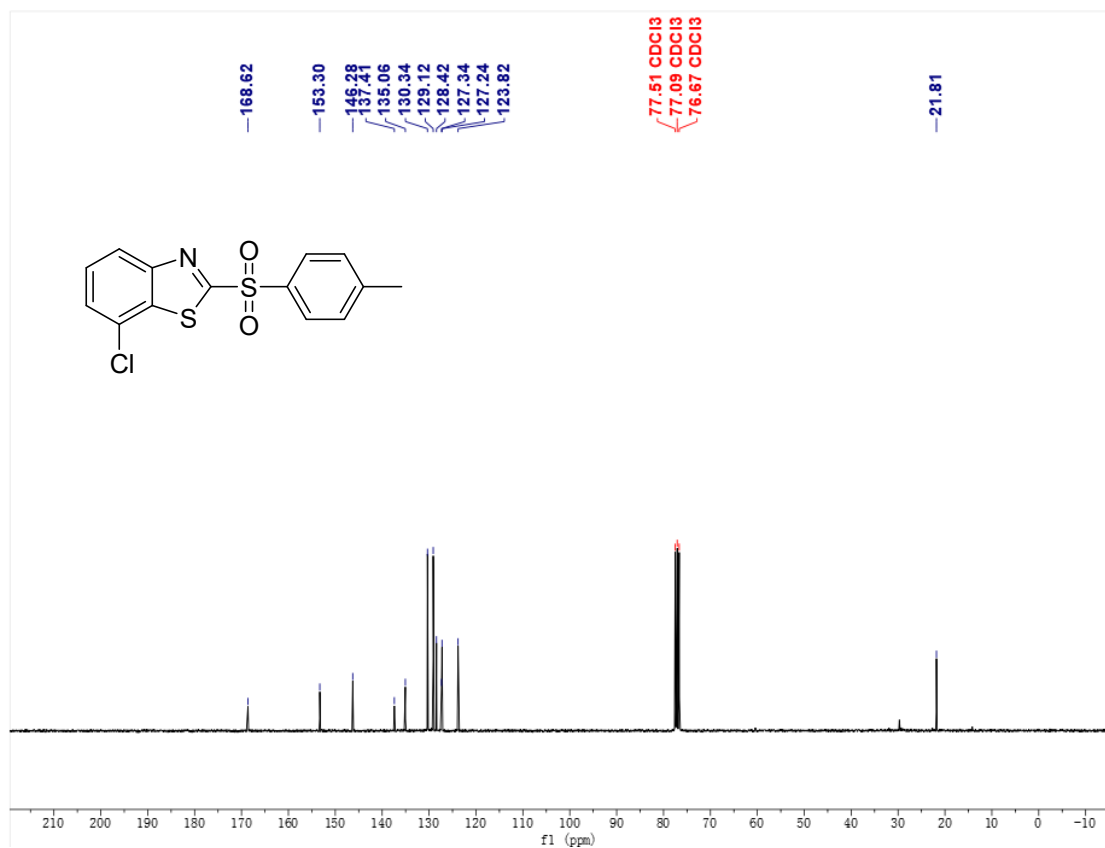

**<sup>13</sup>C NMR (75 MHz, CDCl<sub>3</sub>) of 3bh.**

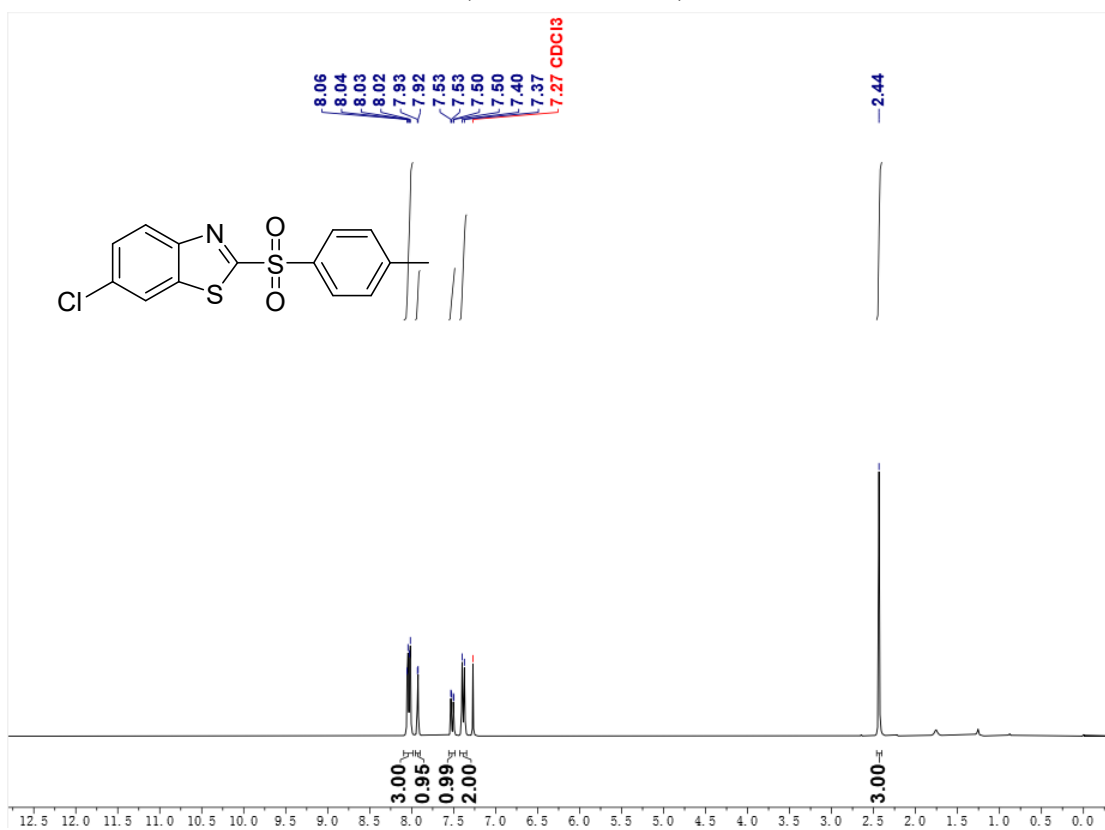

**<sup>1</sup>H NMR (300 MHz, CDCl<sub>3</sub>) of 3bi.**

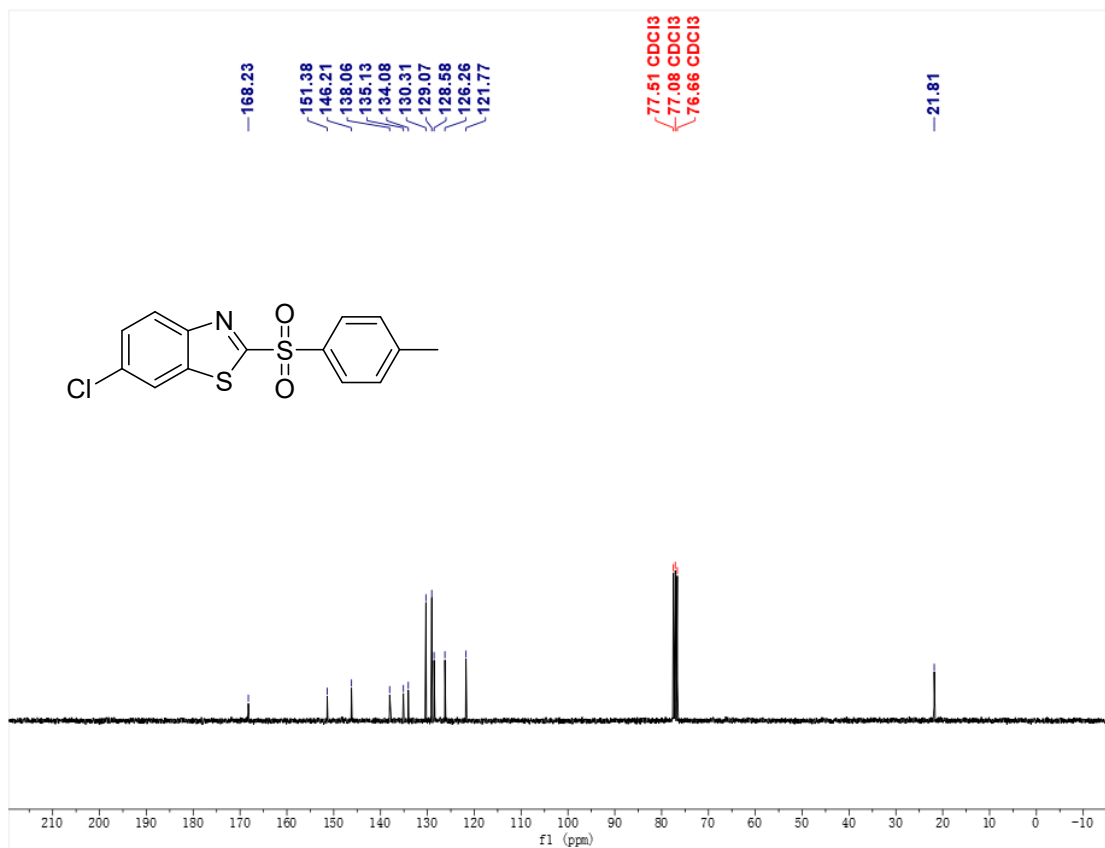

<sup>13</sup>C NMR (75 MHz, CDCl<sub>3</sub>) of **3bi**.

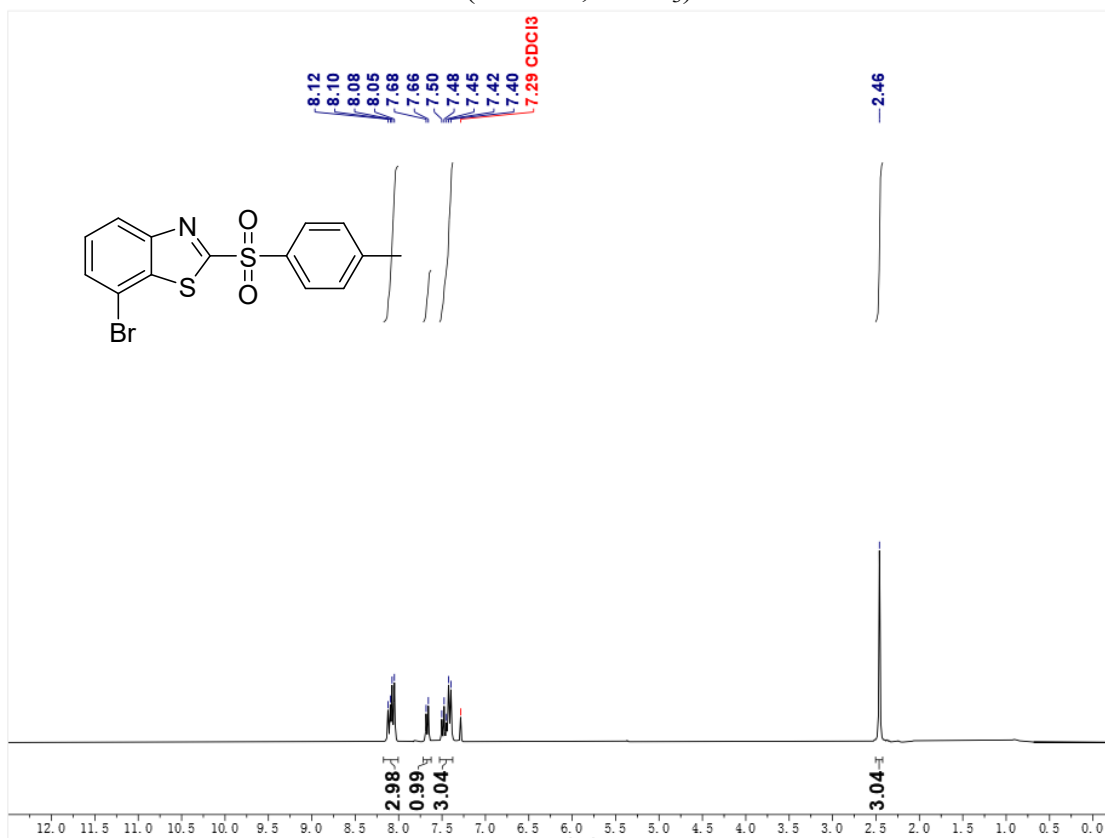

<sup>1</sup>H NMR (300 MHz, CDCl<sub>3</sub>) of **3bk**.

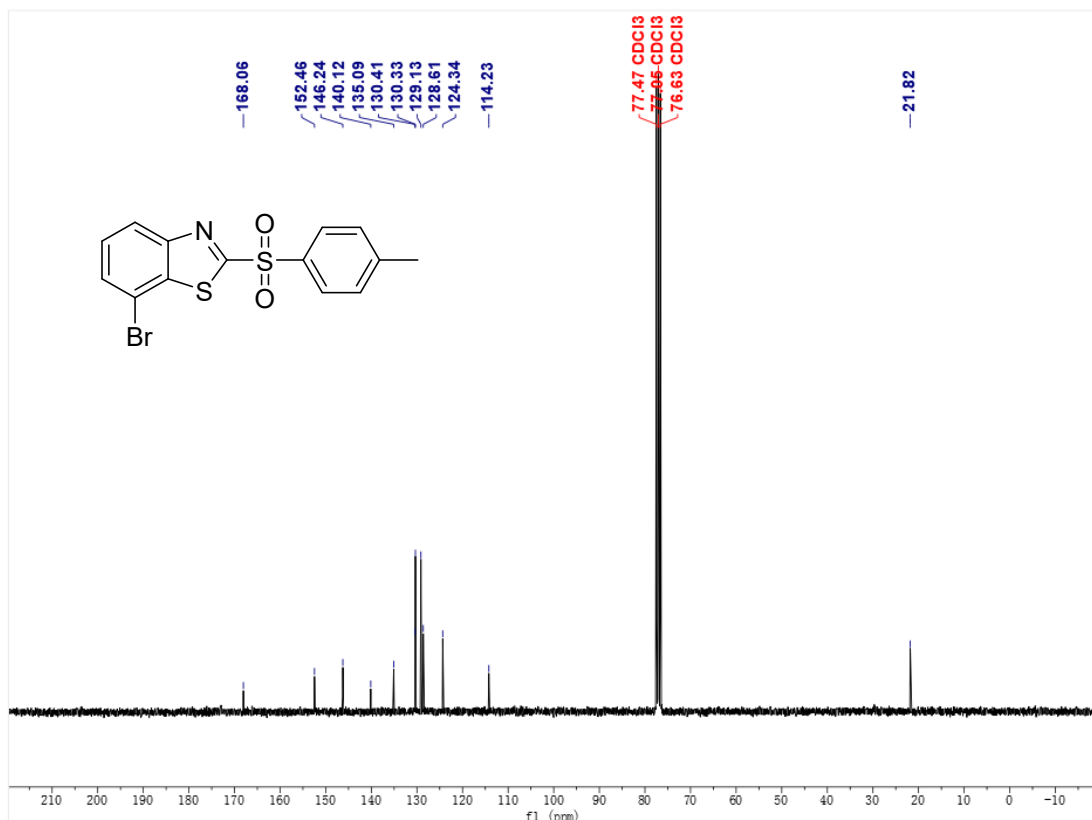

<sup>13</sup>C NMR (75 MHz, CDCl<sub>3</sub>) of 3bk.

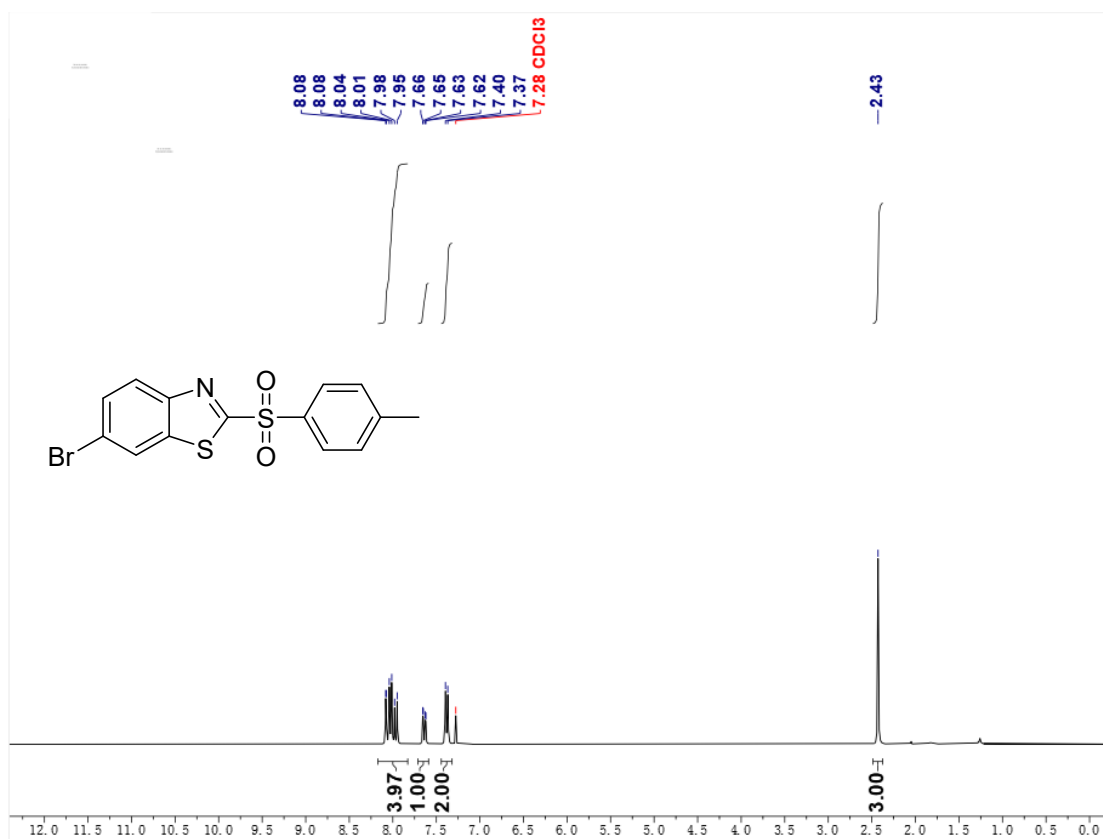

<sup>1</sup>H NMR (300 MHz, CDCl<sub>3</sub>) of 3bl.

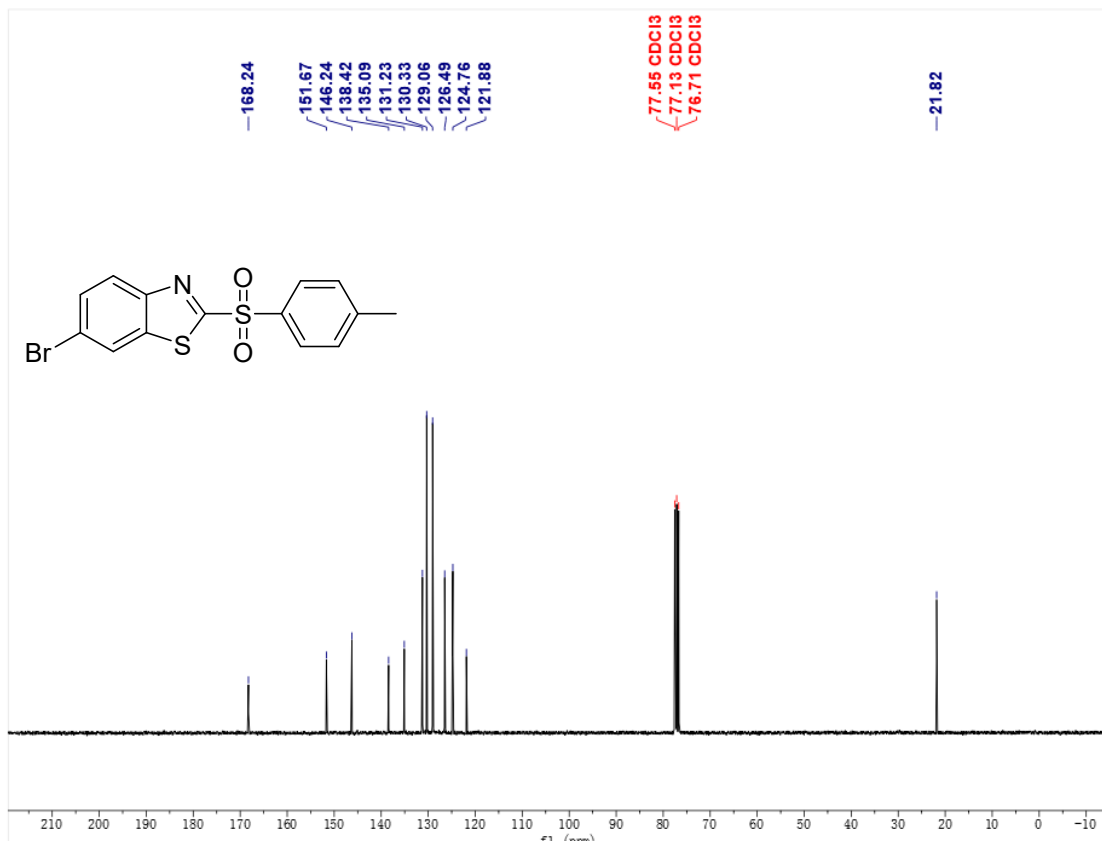

<sup>13</sup>C NMR (75 MHz, CDCl<sub>3</sub>) of **3bl**.

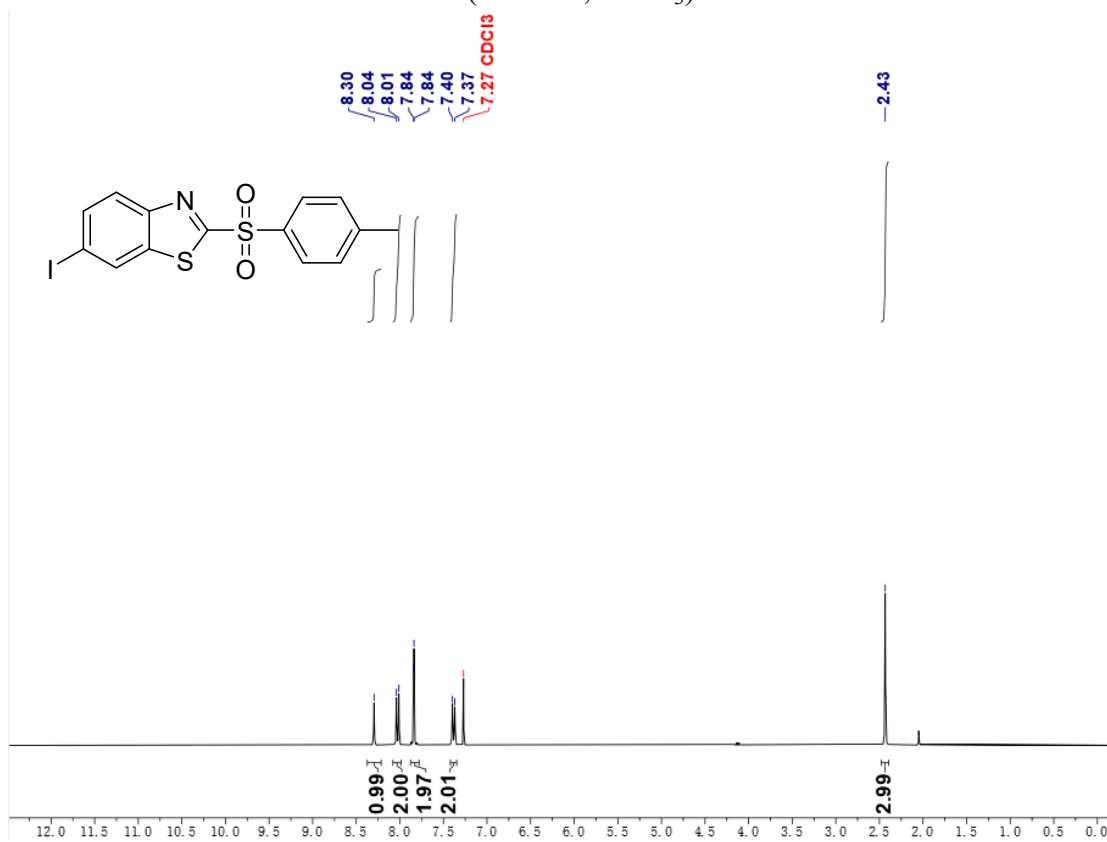

<sup>1</sup>H NMR (300 MHz, CDCl<sub>3</sub>) of **3bm**.

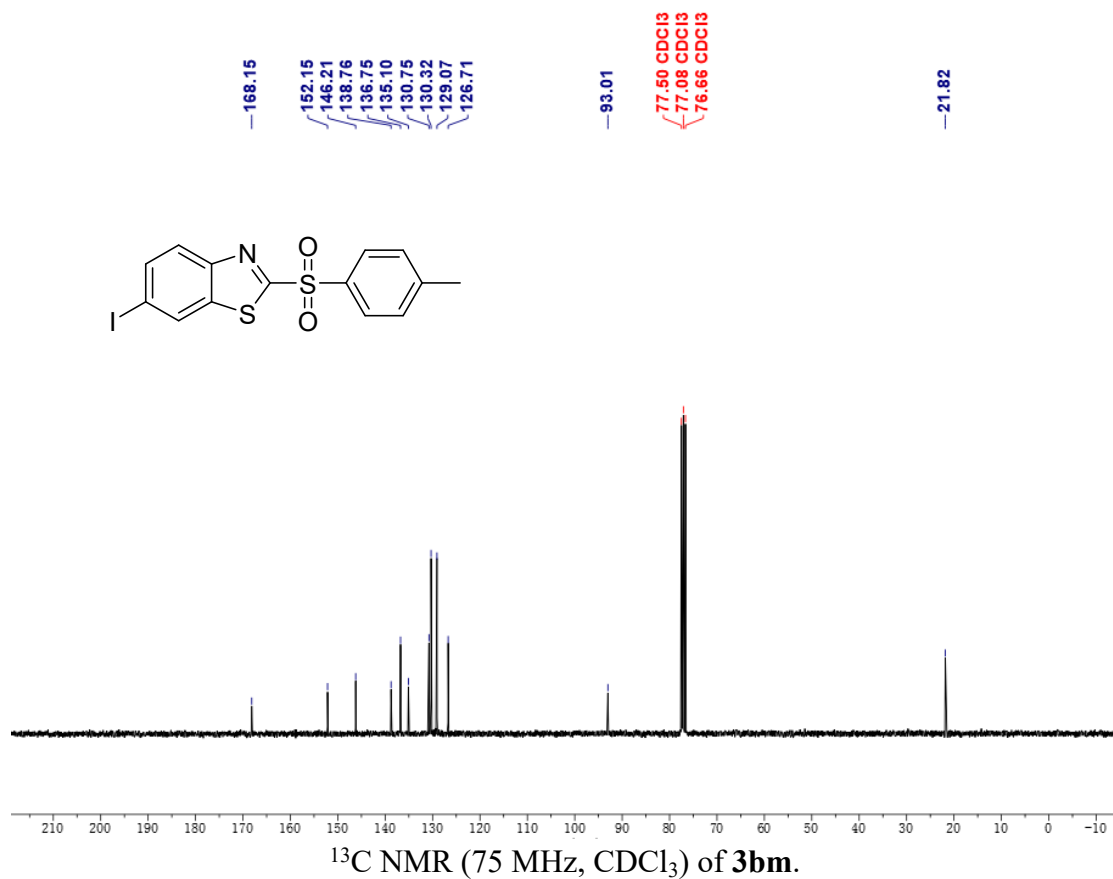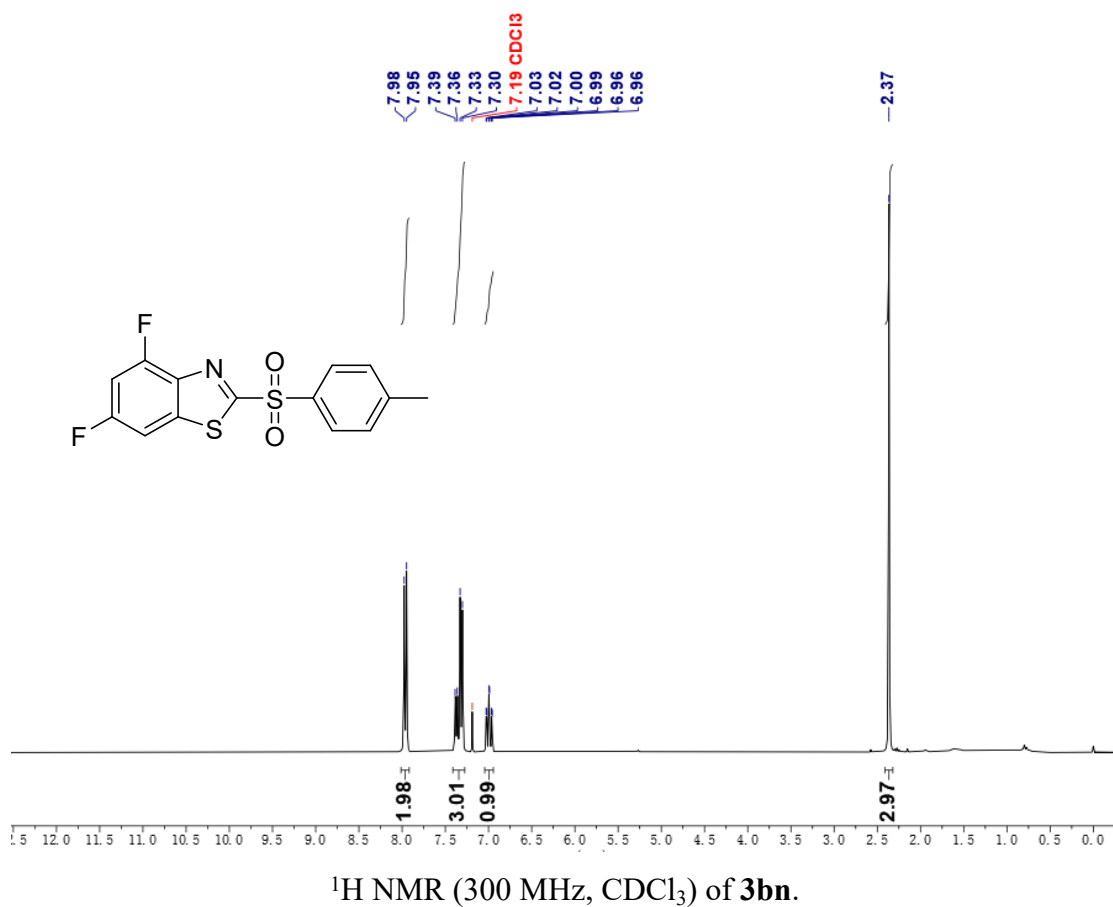

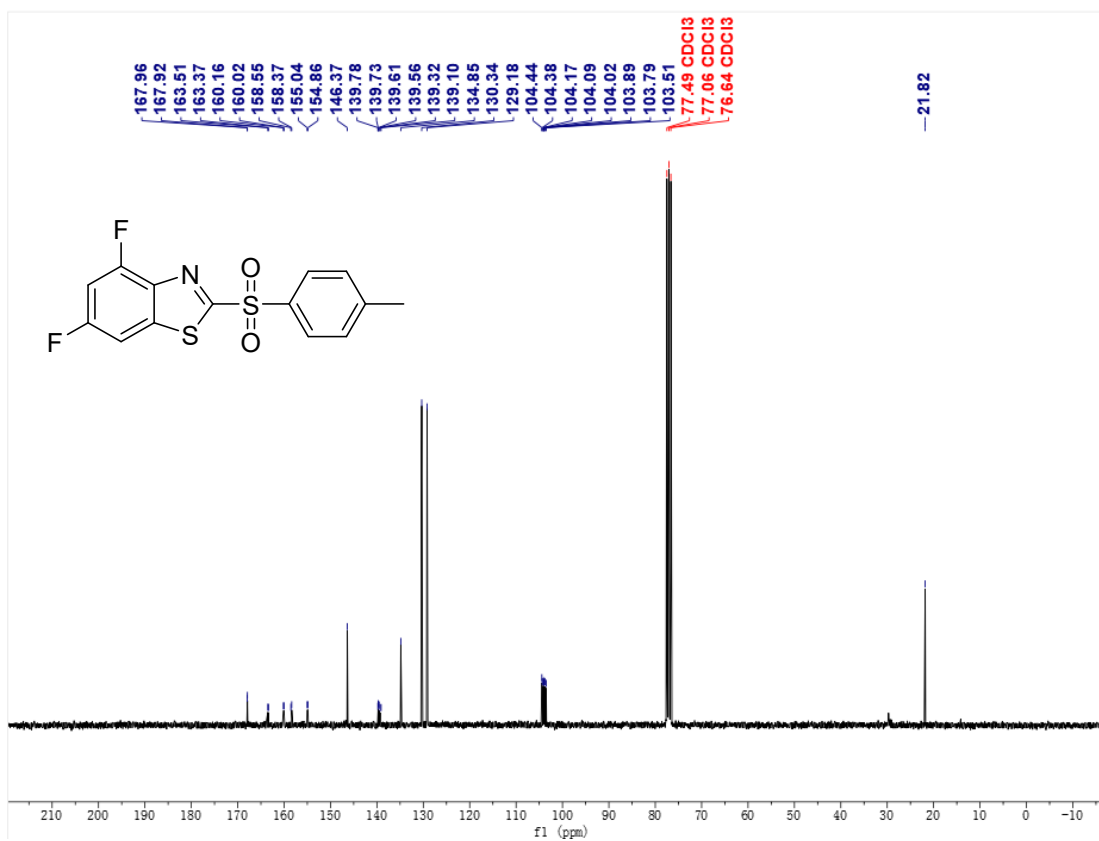

<sup>13</sup>C NMR (75 MHz, CDCl<sub>3</sub>) of 3bn.

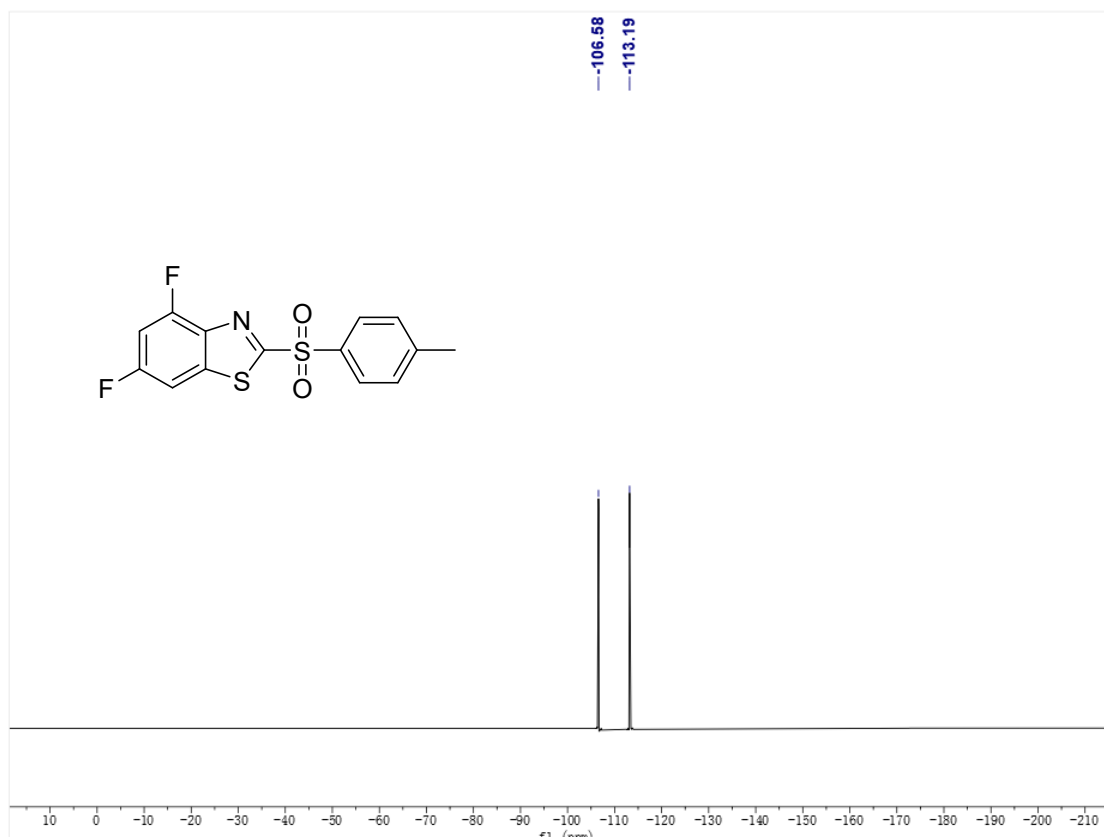

<sup>19</sup>F NMR (282 MHz, CDCl<sub>3</sub>) of 3bn.



## 4. Reference

- [S1] H. Zhu, Y. Zhang, G. Ren, Y. Wang, J. Meng, Q. Fan, Z. Xie and Z.-G. Le, *Chem. Commun.*, 2023, **59**, 1050-1053.
- [S2] H. Zhu, Y. Zhong, L. Yan, H. Zhang, Y. Shen, Z. Le, Q. Fan and Z. Xie, *Green Chem.*, 2024, **26**, 1387.
- [S3] H. Zhang, H. Zhu, Y. Zhang, G. Ren, W. Fang, Q. Fan and Z. Xie, *Chem. Asian J.*, 2023, **18**, e202300757.
- [S4] H. Motiwala, Y. Kuo, B. Stinger, B. Palfey and B. Martin, *J. Am. Chem. Soc.*, 2020, **142**, 1801–1810.
- [S5] A. F. Xinlan, Loïc R. E. Pantaine, D. C. Blakemore, I. B. Moses, N. W. Sach, A. Shavnya and M. C. Willis, *Angew. Chem. Int. Ed.* 2021, **60**, 22461 – 22468.
- [S6] P. Sandeep, P. Biprajit, P. Hrishikesh, S. Rajat, C. Indranil, *Chem. Commun.*, 2022, **58**, 4857-4860.
